# Supplementary material for: Enantioselective transformations of 5-hydroxymethylfurfural via catalytic asymmetric 1,3-dipolar cycloaddition of azomethine ylides
Source: Royal Society of Chemistry journal article supplement (doi:10.1039/d3cc00499f), 2023-01-01
Supplement: d3cc00499f1.pdf [file d3cc00499f1.pdf]

Supporting information for

**Enantioselective transformations of 5-hydroxymethylfurfural via Catalytic  
Asymmetric 1,3-Dipolar Cycloaddition of Azomethine Ylides.**

Christian Cristobal,<sup>a</sup> César Corral,<sup>a</sup> Juan C. Carretero,<sup>a,b,c</sup> María Ribagorda\*,<sup>a,b</sup>

Javier Adrio\*<sup>a,b,c</sup>

<sup>a.</sup> *Departamento de Química Orgánica, Facultad de Ciencias, C/ Francisco Tomás y Valiente 7, Universidad Autónoma de Madrid, 28049 Madrid (Spain ). E-mail: javier.adrio@uam.es*

<sup>b.</sup> *Institute for Advanced Research in Chemical Sciences (IAdChem), Universidad Autónoma de Madrid, 28049 Madrid (Spain)*

<sup>c.</sup> *Centro de Innovación en Química Avanzada (ORFEO-CINQA), Spain*

**Table of Contents**

|                                                                                  |     |
|----------------------------------------------------------------------------------|-----|
| 1. General methods                                                               | S1  |
| 2. Typical procedure for the synthesis of imines                                 | S2  |
| 3. Typical procedure for the asymmetric [3+2] cycloaddition of azomethine ylides | S4  |
| 4. Preparation of racemic products for HPLC analysis                             | S12 |
| 5. Additional transformations                                                    | S12 |
| 6. Stereochemical assignment                                                     | S15 |
| 7. HPLC chart                                                                    | S16 |
| 8. NMR Spectra collection                                                        | S32 |
| 9. Bibliography                                                                  | S59 |

## 1. General methods

All anaerobic and moisture-sensitive manipulations were carried out in anhydrous solvents and under nitrogen. Dichloromethane, toluene, and tetrahydrofuran were dried over the PureSolv MD purification system. Melting points were taken in open-end capillary tubes. Reactions were monitored by thin-layer chromatography carried out on 0.25 mm silica gel plates (230-400 mesh). Flash column chromatographies were performed using silica gel (230-400 mesh). NMR spectra were recorded on AU-300 MHz instrument and calibrated using residual undeuterated solvent ( $\text{CDCl}_3$ ) as internal reference. MS spectra were recorded on a VG *AutoSpec* mass spectrometer. The HPLC chromatograms of the racemic and enantiomerically enriched cycloadducts are also included.  $\alpha$ -Iminoesters (**1a-J**) were prepared by condensation of aminoesters hydrochlorides with the corresponding aldehydes, according to literature procedures.<sup>1</sup>

## 2. Typical procedure for the synthesis of imines

### Typical procedure 1: Methyl (S)-2-(5-(hydroxymethyl)furan-2-yl)methyleneaminopropanoate (1a)

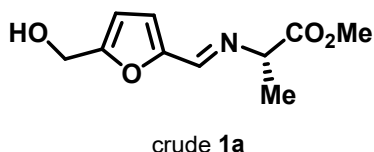

A suspension of (S)-alanine methyl ester hydrochloride (122.8 mg, 0.88 mmol), anhydrous  $\text{MgSO}_4$  (excess) and  $\text{Et}_3\text{N}$  (0.12 mL, 0.88 mmol) in dry dichloromethane (4.0 mL) was stirred at room temperature for 30 minutes. 5-(Hydroxymethyl)furfural (100 mg, 0.80 mmol) was added and the mixture was stirred at room temperature for 12 hours. Water (10 mL) was added, the organic layer was separated, and the aqueous phase was extracted with dichloromethane (3x10mL). The combined organic layers were dried over  $\text{MgSO}_4$  and evaporated under reduced pressure to afford **1a** (100 mg, 59%, yellow oil), which was used without further purification in the next reaction step.

**$^1\text{H-NMR}$  (300 MHz,  $\text{CDCl}_3$ )**  $\delta$  8.06 (s, 1H), 6.76 (d,  $J$  = 3.5 Hz, 1H), 6.39 (d,  $J$  = 3.5 Hz, 1H), 4.67 (s, 2H), 4.11 (q,  $J$  = 6.7 Hz, 1H), 3.74 (s, 3H), 1.53 (d,  $J$  = 6.0 Hz, 3H).

### Methyl (S)-2-(5-(hydroxymethyl)furan-2-yl)methyleneaminobutanoate (1b)

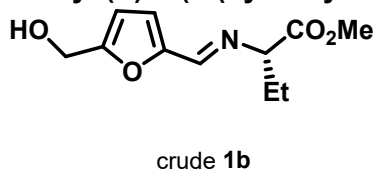

Following the typical procedure 1, the reaction of (S)-methyl 2-aminobutanoate (103.1 mg, 0.88 mmol),  $\text{MgSO}_4$  (excess),  $\text{Et}_3\text{N}$  (0.12 mL, 0.88 mmol) and 5-(Hydroxymethyl)furfural (100.0 mg, 0.80 mmol) in dichloromethane (5 mL) afforded **1b** (174 mg, 97%, yellow oil).

**$^1\text{H-NMR}$  (300 MHz,  $\text{CDCl}_3$ )**  $\delta$  7.92 (s, 1H), 6.69 (d,  $J$  = 3.4 Hz, 1H), 6.28 (d,  $J$  = 3.3 Hz, 1H), 4.55 (s, 2H), 3.63 (s, 3H), 2.01 – 1.88 (m, 1H), 1.85 – 1.73 (m, 1H), 0.80 (t,  $J$  = 7.5 Hz, 3H).

### Methyl (S)-2-(5-(hydroxymethyl)furan-2-yl)methyleneamino-4-methylpentanoate (1c)

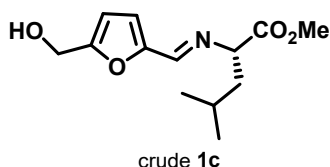

Following the typical procedure 1, the reaction of (S)-leucine methyl ester hydrochloride (159.9 mg, 0.88 mmol),  $\text{MgSO}_4$  (excess),  $\text{Et}_3\text{N}$  (0.12 mL, 0.88 mmol) and 5-(Hydroxymethyl)furfural (100.0 mg, 0.80 mmol) in dichloromethane (5 mL) afforded **1c** (200 mg, 99%, yellow oil).

**$^1\text{H-NMR}$  (300 MHz,  $\text{CDCl}_3$ )**  $\delta$  7.87 (s, 1H), 6.64 (d,  $J$  = 3.4 Hz, 1H), 6.21 (d,  $J$  = 3.4 Hz, 1H), 4.48 (s, 2H), 3.85 (dd,  $J$  = 8.4, 6.0 Hz, 1H), 3.55 (s, 3H), 1.68 – 1.61 (m, 2H), 1.45 – 1.32 (m, 1H), 0.77 (d,  $J$  = 6.5 Hz, 3H), 0.72 (d,  $J$  = 6.5 Hz, 3H).

### Ethyl (S)-2-(5-(hydroxymethyl)furan-2-yl)methyleneamino-3-phenylpropanoate (1d)

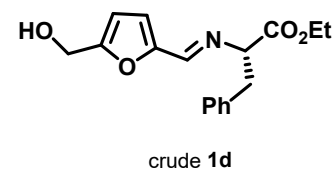

Following the typical procedure 1, the reaction of (S)-phenylalanine ethyl ester hydrochloride (202.1 mg, 0.88 mmol),  $\text{MgSO}_4$  (excess),  $\text{Et}_3\text{N}$  (0.12 mL, 0.88 mmol) and 5-(Hydroxymethyl)furfural (100.0 mg, 0.80 mmol) in dichloromethane (5 mL) afforded **1d** (200 mg, 83%, yellow oil).

**$^1\text{H-NMR}$  (300 MHz,  $\text{CDCl}_3$ )**  $\delta$  7.77 (s, 1H), 7.40 – 7.21 (m, 5H), 6.76 (d,  $J$  = 2.5 Hz, 1H), 6.43 (d,  $J$  = 2.5 Hz, 1H), 4.73 (s, 2H), 4.26 (q,  $J$  = 7.0 Hz, 2H), 4.18 (dd,  $J$  = 6.5, 3.8 Hz, 1H), 3.45 (dd,  $J$  = 13.5, 5.4 Hz, 1H), 3.19 (dd,  $J$  = 13.5, 8.6 Hz, 1H), 1.31 (t,  $J$  = 7.0 Hz, 3H).

**Methyl (S)-2-(5-(hydroxymethyl)furan-2-yl)methyleneamino-2-phenylacetate (1e)**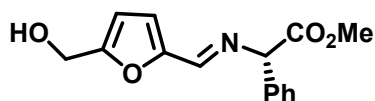crude **1e**

Following the typical procedure 1, the reaction of (S)-2-phenylglycine methyl ester hydrochloride (177.5 mg, 0.88 mmol), MgSO<sub>4</sub> (excess), Et<sub>3</sub>N (0.12 mL, 0.88 mmol) and 5-(Hydroxymethyl)furfural (100.0 mg, 0.80 mmol) in dichloromethane (5 mL) afforded **1e** (200 mg, 91%, yellow oil).

**<sup>1</sup>H-NMR (300 MHz, CDCl<sub>3</sub>)** δ 8.01 (s, 1H), 7.46 – 7.40 (m, 2H), 7.37 – 7.30 (m, 3H), 6.75 (d, *J* = 3.4 Hz, 1H), 6.35 (d, *J* = 3.4 Hz, 1H), 4.63 (s, 2H), 3.73 (s, 3H), 3.69 (s, 1H).

**Methyl (S)-3-(tert-butoxy)-2-(5-(hydroxymethyl)furan-2-yl)methyleneaminopropanoate (1f)**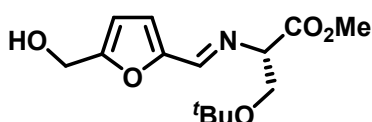crude **1f**

Following the typical procedure 1, the reaction of O-tert-buthyl-(S)-serine methyl ester hydrochloride (186.3 mg, 0.88 mmol), MgSO<sub>4</sub> (excess), Et<sub>3</sub>N (0.12 mL, 0.88 mmol) and 5-(Hydroxymethyl)furfural (100.0 mg, 0.80 mmol) in dichloromethane (5 mL) afforded **1f** (200 mg, 88%, yellow oil).

**<sup>1</sup>H-NMR (300 MHz, CDCl<sub>3</sub>)** δ 7.92 (s, 1H), 6.67 (d, *J* = 3.4 Hz, 1H), 6.26 (d, *J* = 3.4 Hz, 1H), 4.51 (s, 2H), 3.97 (t, *J* = 6.4 Hz, 1H), 3.79 – 3.73 (m, 1H), 3.62 (s, 3H), 3.50 (t, *J* = 8.0 Hz, 1H), 1.03 (s, 9H).

**Methyl (S)-2-(5-(hydroxymethyl)furan-2-yl)methyleneamino-4-(methylthio)butanoate (1g)**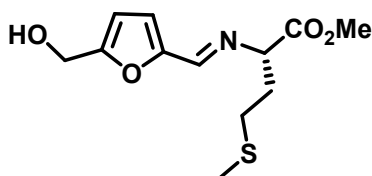crude **1g**

Following the typical procedure 1, the reaction of (S)-methionine methyl ester hydrochloride (175.7 mg, 0.88 mmol), MgSO<sub>4</sub> (excess), Et<sub>3</sub>N (0.12 mL, 0.88 mmol) and 5-(Hydroxymethyl)furfural (100.0 mg, 0.80 mmol) in dichloromethane (5 mL) afforded **1g** (200 mg, 92%, yellow oil).

**<sup>1</sup>H-NMR (300 MHz, CDCl<sub>3</sub>)** δ 8.03 (s, 1H), 6.76 (d, *J* = 3.4 Hz, 1H), 6.37 (d, *J* = 3.4 Hz, 1H), 4.64 (s, 2H), 4.13 (dd, *J* = 8.6, 5.0 Hz, 1H), 3.71 (s, 3H), 2.66 – 2.50 (m, 2H), 2.43 – 2.33 (m, 1H), 2.28 – 2.14 (m, 2H), 2.05 (s, 3H).

**Methyl (R)-3-(benzylthio)-2-(5-(hydroxymethyl)furan-2-yl)methyleneaminopropanoate (1h)**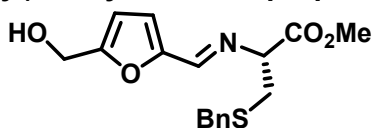crude **1h**

Following the typical procedure 1, the reaction of S-benzyl-(R)-cysteine methyl ester hydrochloride (230.4 mg, 0.88 mmol), MgSO<sub>4</sub> (excess), Et<sub>3</sub>N (0.12 mL, 0.88 mmol) and 5-(Hydroxymethyl)furfural (100.0 mg, 0.80 mmol) in dichloromethane (5 mL) afforded **1h** (250 mg, 94%, yellow oil).

**<sup>1</sup>H NMR-(300 MHz, CDCl<sub>3</sub>)** δ 7.89 (s, 1H), 7.31 – 7.14 (m, 5H), 6.77 (d, *J* = 3.4 Hz, 1H), 6.37 (d, *J* = 3.4 Hz, 1H), 4.63 (s, 2H), 3.89 (dd, *J* = 8.3, 5.3 Hz, 1H), 3.70 (s, 5H), 3.07 (dd, *J* = 13.8, 5.3 Hz, 1H), 2.84 (dd, *J* = 13.8, 8.3 Hz, 1H).

**Methyl 2-(5-(hydroxymethyl)furan-2-yl)methyleneaminoacetate (1i)**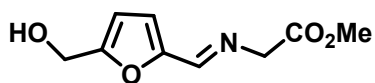crude **1i**

Following the typical procedure 1, the reaction of glycine methyl ester hydrochloride (110.4 mg, 0.88 mmol), MgSO<sub>4</sub> (excess), Et<sub>3</sub>N (0.12 mL, 0.88 mmol) and 5-(Hydroxymethyl)furfural (100.0 mg, 0.80 mmol) in dichloromethane (5 mL) afforded **1i** (150 mg, 95%, yellow oil).

**<sup>1</sup>H-NMR (300 MHz, CDCl<sub>3</sub>)**  $\delta$  7.97 (s, 1H), 6.73 (d,  $J$  = 3.5 Hz, 1H), 6.32 (d,  $J$  = 3.5 Hz, 1H), 4.58 (s, 2H), 4.30 (s, 2H), 3.70 (s, 3H).

**Methyl (S)-2-((5-methylfuran-2-yl)methyleneamino)propanoate (1j)**

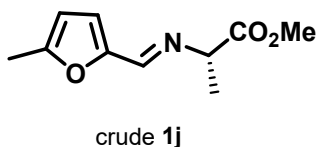

Following the typical procedure 1, the reaction of (S)-alanine methyl ester hydrochloride (455.0 mg, 3.26 mmol), MgSO<sub>4</sub> (excess), Et<sub>3</sub>N (0.50 mL, 3.58 mmol) and 5-methylfuran-2-carbaldehyde (0.25 mL, 2.51 mmol) in dichloromethane (5 mL) afforded **1j** (350.0 mg, 70%, yellow oil)

**<sup>1</sup>H-NMR (300 MHz, CDCl<sub>3</sub>)**  $\delta$  7.78 (s, 1H), 6.46 (d,  $J$  = 2.9 Hz, 1H), 5.85 (d,  $J$  = 2.9 Hz, 1H), 3.84 (q,  $J$  = 6.8 Hz, 1H), 3.47 (s, 3H), 2.11 (s, 3H), 1.28 (d,  $J$  = 6.8 Hz, 3H).

**Methyl (S)-2-((5-(triisopropylsilyloxymethyl)furan-2-yl)methyleneamino)propanoate (1k)**

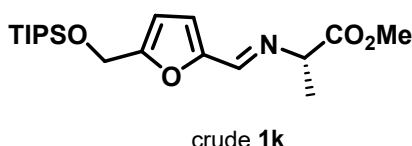

Following the typical procedure 1, the reaction of (S)-alanine methyl ester hydrochloride (165.0 mg, 1.18 mmol), MgSO<sub>4</sub> (excess), Et<sub>3</sub>N (0.17 mL, 1.22 mmol) and 5-((triisopropylsilyloxy)methyl)furan-2-carbaldehyde (275.3 mg, 0.97 mmol) in dichloromethane (5 mL) afforded **1k** (250.4 mg, 70%, yellow oil)

**<sup>1</sup>H-NMR (300 MHz, CDCl<sub>3</sub>)**  $\delta$  8.10 (s, 1H), 7.30 (s, 1H), 6.43 (d,  $J$  = 2.5 Hz, 1H), 4.86 (s, 2H), 4.14 (q,  $J$  = 6.9 Hz, 1H), 3.78 (s, 3H), 1.57 (d,  $J$  = 6.6 Hz, 3H), 1.23 – 1.17 (m, 3H), 1.15 – 1.06 (m, 18H).

**Methyl (S)-2-(5-((methoxymethoxymethyl)furan-2-yl)methyleneamino)propanoate (1l)**

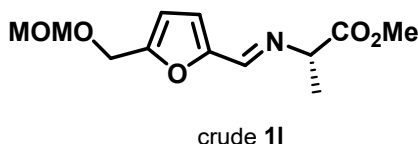

Following the typical procedure 1, the reaction of (S)-alanine methyl ester hydrochloride (135.0 mg, 0.97 mmol), MgSO<sub>4</sub> (excess), Et<sub>3</sub>N (0.13 mL, 0.95 mmol) and 5-(methoxymethoxymethyl)furan-2-carbaldehyde (128.9 mg, 0.76 mmol) in dichloromethane (5 mL) afforded **1l** (158.3 mg, 81%, yellow oil)

**<sup>1</sup>H-NMR (300 MHz, CDCl<sub>3</sub>)**  $\delta$  8.00 (s, 1H), 6.72 (d,  $J$  = 3.2 Hz, 1H), 6.35 (d,  $J$  = 3.2 Hz, 1H), 4.58 (s, 2H), 4.49 (s, 2H), 4.01 (q,  $J$  = 6.8 Hz, 1H), 3.63 (s, 3H), 3.29 (s, 3H), 1.43 (d,  $J$  = 6.8 Hz, 3H).

**3. Typical procedure for the asymmetric [3+2] cycloaddition of azomethine ylides**

**Typical Procedure 2: Methyl (1S,3R,3aS,6aR)-3-(5-(hydroxymethyl)furan-2-yl)-1-methyl-4,6-dioxo-5-phenyloctahydropyrrolo[3,4-c]pyrrole-1-carboxylate (3a)**

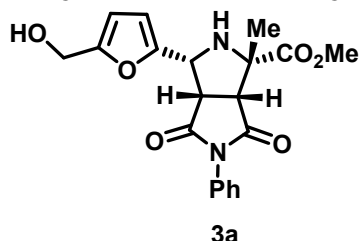

To a suspension of [Cu(CH<sub>3</sub>CN)<sub>4</sub>]PF<sub>6</sub> (8.9 mg, 2.4·10<sup>-2</sup> mmol), (R)-Fesulphos (11.9 mg, 2.6·10<sup>-2</sup> mmol), *N*-phenylmaleimide (41.6, 0.24 mmol) and **1a** (50 mg, 0.24 mmol) in anhydrous dichloromethane (5 mL) under argon atmosphere, Et<sub>3</sub>N (10  $\mu$ L, 7.2·10<sup>-2</sup> mmol) was added. The resulting mixture was stirred at room temperature for 12 h, filtered over celite® and the solvent was removed under reduced pressure at the rotary evaporator. The

crude mixture was purified by flash chromatography, (heptane:AcOEt 1:1) to afford **3a** (60.0 mg, 65%, white solid),

**M.p.:** 193-195°C.

**[ $\alpha$ ]<sub>D</sub><sup>20</sup>:** +61.8 (*c* = 0.5, CHCl<sub>3</sub>), 95% *ee*.

**SFC:** Chiralpak IB, CO<sub>2</sub>/MeOH from 95-5 to 70/30 in 8 min, flow rate 2 mL/min ( $\lambda$  = 230 nm) *t<sub>R</sub>*: 2.72 min (2*R*,3*S*,3*aR*,6*aS*)-**3a** and 3.02 min (1*S*,3*R*,3*aS*,6*aR*)-**3a**.

**<sup>1</sup>H-NMR (300 MHz, CDCl<sub>3</sub>)**  $\delta$  7.47 – 7.35 (m, 3H), 7.26 – 7.20 (m, 2H), 6.34 (d, *J* = 3.3 Hz, 1H), 6.20 (d, *J* = 3.3 Hz, 1H), 4.82 (d, *J* = 8.7 Hz, 1H), 4.42 (s, 2H), 3.86 (s, 3H), 3.64 (t, *J* = 8.3 Hz, 1H), 3.45 (d, *J* = 8.3 Hz, 1H), 1.57 (s, 3H).

**<sup>13</sup>C NMR (75 MHz, CDCl<sub>3</sub>)**  $\delta$  174.8, 174.2, 172.4, 154.7, 149.4, 131.8, 129.3(2C), 128.9, 126.5(2C), 109.6, 108.8, 68.4, 58.1, 57.4, 56.8, 53.1, 50.1, 23.9.

**HRMS (ESI+):** Calculated for C<sub>20</sub>H<sub>21</sub>N<sub>2</sub>O<sub>6</sub>, 385.1394; found, 385.1388.

**Methyl (1*S*,3*R*,3*aS*,6*aR*)-1-ethyl-3-(5-(hydroxymethyl)furan-2-yl)-4,6-dioxo-5-phenyloctahydropyrrolo[3,4-*c*]pyrrole-1-carboxylate (**3b**)**

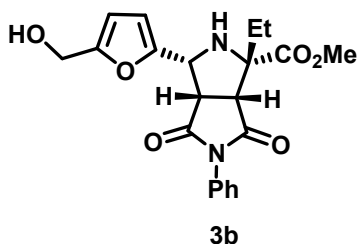

Following the typical procedure 2, the reaction of Cu(CH<sub>3</sub>CN)<sub>4</sub>PF<sub>6</sub> (7.5 mg, 2.0·10<sup>-2</sup> mmol), (*R*)-Fesulphos (10.1 mg, 2.2·10<sup>-2</sup> mmol), *N*-phenylmaleimide (34.6 mg, 0.20 mmol), **1b** (46 mg, 0.20 mmol) and Et<sub>3</sub>N (9  $\mu$ L, 6.0·10<sup>-2</sup> mmol) in dichloromethane (5 mL) at 0°C for 12 h, afforded, after purification by silica gel flash chromatography (heptane-AcOEt 1:1) the cycloadduct **3b** (58.2 mg, 73%, white solid).

**M.p.:** 187-189°C.

**[ $\alpha$ ]<sub>D</sub><sup>20</sup>:** +9.9 (*c* = 1.0, CHCl<sub>3</sub>), 95% *ee*.

**SFC:** Chiralpak IB, CO<sub>2</sub>/MeOH from 95-5 to 70/30 in 8 min, flow rate 2 mL/min ( $\lambda$  = 254 nm) *t<sub>R</sub>*: 2.73 min (2*R*,3*S*,3*aR*,6*aS*)-**3b** and 3.02 min (1*S*,3*R*,3*aS*,6*aR*)-**3b**.

**<sup>1</sup>H-NMR (300 MHz, CDCl<sub>3</sub>)**  $\delta$  7.48 – 7.34 (m, 3H), 7.29 – 7.22 (m, 2H), 6.37 (d, *J* = 3.2 Hz, 1H), 6.23 (d, *J* = 3.2 Hz, 1H), 4.70 (d, *J* = 9.0 Hz, 1H), 4.44 (s, 2H), 3.88 (s, 3H), 3.61 (dd, *J* = 9.0, 7.7 Hz, 1H), 3.46 (d, *J* = 7.7 Hz, 1H), 3.13 (d, *J* = 9.4 Hz, 1H, NH), 2.22 – 2.10 (m, 1H), 1.71 (dq, *J* = 14.2, 7.2 Hz, 1H), 0.94 (t, *J* = 7.2 Hz, 3H).

**<sup>13</sup>C-NMR (75 MHz, CDCl<sub>3</sub>)**  $\delta$  174.9, 174.4, 171.7, 154.7, 149.6, 131.8, 129.3(2C), 128.9, 126.5(2C), 109.6, 108.8, 72.5, 57.6, 57.4, 56.6, 52.9, 50.1, 28.7, 8.4.

**HRMS (ESI+):** Calculated for C<sub>21</sub>H<sub>23</sub>N<sub>2</sub>O<sub>6</sub>, 399.1551; found, 399.1549.

**Methyl (1*S*,3*R*,3*aS*,6*aR*)-3-(5-(hydroxymethyl)furan-2-yl)-1-isobutyl-4,6-dioxo-5-phenyloctahydropyrrolo[3,4-*c*]pyrrole-1-carboxylate (**3c**)**

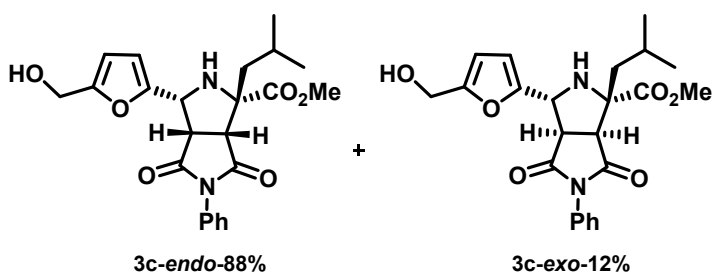

Following the typical procedure 2, the reaction of Cu(CH<sub>3</sub>CN)<sub>4</sub>PF<sub>6</sub> (7.5 mg, 2.0·10<sup>-2</sup> mmol), (*R*)-Fesulphos (10.1 mg, 2.2·10<sup>-2</sup> mmol), *N*-phenylmaleimide (34.6 mg, 0.20 mmol), **1c** (50 mg, 0.20 mmol) and Et<sub>3</sub>N (9  $\mu$ L, 6.0·10<sup>-2</sup> mmol) in

dichloromethane (5 mL) at 0°C for 12 h. The crude mixture was concentrated in vacuo and gave a 85:15 mixture of diastereoisomers **3c-endo** and **3c-exo**. After flash column chromatography (heptane-AcOEt 1:1) a fraction containing 88:12 mixture of **3c-endo** and **3c-exo** could be isolated (68.2 mg, 80%, white solid).

**M.p.:** 117-120°C.

**[ $\alpha$ ]<sub>D</sub><sup>20</sup>:** +11.3 (*c* = 1.0 CHCl<sub>3</sub>), 98% *ee*.

**SFC:** Chiralpak IB, CO<sub>2</sub>/MeOH from 95-5 to 70/30 in 8 min, flow rate 2 mL/min ( $\lambda$  = 230 nm) *t<sub>R</sub>*: 3.06 min (2*R*,3*S*,3*aR*,6*aS*)-**3c-endo** and 3.32 min (1*S*,3*R*,3*aS*,6*aR*)-**3c-endo**.

**<sup>1</sup>H-NMR (300 MHz, CDCl<sub>3</sub>)**  $\delta$  7.45 – 7.31 (m, 3H, **3c-endo**), 7.26 – 7.17 (m, 2H, **3c-endo**), 7.12 – 7.09 (m, 3H, **3c-exo**), 6.59 (s, 1H, **3c-exo**), 6.41 (d, *J* = 5.6 Hz, 1H, **3c-exo**), 6.33 (d, *J* = 2.8 Hz, 1H, **3c-endo**), 6.18 (s, 1H, **3c-endo**), 4.65 (d, *J* = 8.7 Hz, 1H,

**3c-endo**), 4.54 (d,  $J = 7.2$  Hz, 2H, **3c-exo**), 4.40 (s, 2H, **3c-endo**), 3.83 (s, 3H, **3c-endo**), 3.80 (s, 2H, **3c-exo**), 3.55 (t,  $J = 8.7$  Hz, 2H, **3c-endo**), 3.44 (d,  $J = 7.0$  Hz, 2H, **3c-exo**), 3.35 (d,  $J = 7.2$  Hz, 1H, **3c-endo**), 2.74 (bs, 1H, OH), 2.13 – 1.99 (m, 1H, **3c-endo**), 1.78 (dd,  $J = 13.2, 6.7$  Hz, 1H, **3c-endo**), 1.60 (dd,  $J = 14.1, 4.8$  Hz, 1H, **3c-endo**), 1.09 – 1.01 (m, 3H, **3c-exo**), 0.98 (d,  $J = 6.7$  Hz, 3H, **3c-endo**), 0.90 (d,  $J = 1.5$  Hz, 3H, **3c-exo**), 0.86 (d,  $J = 5.8$  Hz, 3H, **3c-endo**).

**$^{13}\text{C}$ -NMR (75 MHz,  $\text{CDCl}_3$ , **3c-endo**)**  $\delta$  174.6, 174.4, 172.4, 154.8, 149.3, 131.7, 129.2(2C), 128.8, 126.5(2C), 109.5, 108.7, 71.3, 58.0, 57.4, 57.2, 52.7, 50.2, 43.5, 24.8, 24.2, 22.1.

**HRMS (ESI+)**: Calculated for  $\text{C}_{23}\text{H}_{27}\text{N}_2\text{O}_6$ , 427.1864; found, 427.1857.

**Ethyl (1*S*,3*R*,3*aS*,6*aR*)-1-benzyl-3-(5-(hydroxymethyl)furan-2-yl)-4,6-dioxo-5-phenyloctahydropyrrolo[3,4-*c*]pyrrole-1-carboxylate (**3d**)**

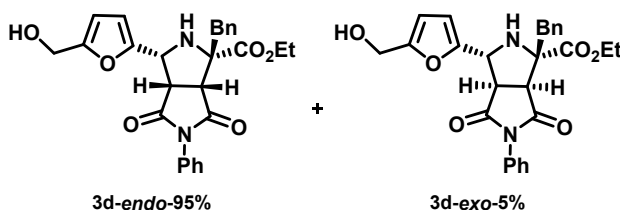

Following the typical procedure 2, the reaction of  $\text{Cu}(\text{CH}_3\text{CN})_4\text{PF}_6$  (6.3 mg,  $1.7 \cdot 10^{-2}$  mmol), (*R*)-Fesulphos (8.6 mg,  $1.9 \cdot 10^{-2}$  mmol), *N*-phenylmaleimide (29.4 mg, 0.17 mmol), **1d** (50 mg, 0.17 mmol) and  $\text{Et}_3\text{N}$  (8  $\mu\text{L}$ ,  $5.1 \cdot 10^{-2}$  mmol) in dichloromethane (5 mL) at 0°C for 12

h. The crude mixture was concentrated in vacuo and gave a 90:10 mixture of diastereoisomers **3d-endo** and **3d-exo**. After flash column chromatography (heptane-AcOEt 1:1) a fraction containing 95:5 mixture of **3d-endo** and **3d-exo** could be isolated (61.3 mg, 76%, white solid).

**M.p.**: 90-92°C.

**$[\alpha]_D^{20}$** : +133.4 ( $c = 1.0$ ,  $\text{CHCl}_3$ ), 98% ee.

**SFC**: Chiralpak IB,  $\text{CO}_2/\text{MeOH}$  from 95-5 to 70/30 in 8 min, flow rate 2 mL/min ( $\lambda = 230$  nm)  $t_R$ : 3.56 min (2*R*,3*S*,3*aR*,6*aS*)-**3d-endo** and 3.78 min (1*S*,3*R*,3*aS*,6*aR*)-**3d-endo**.

**$^1\text{H}$ -NMR (300 MHz,  $\text{CDCl}_3$ , **3d-endo**)**  $\delta$  7.43 – 7.35 (m, 3H), 7.34 – 7.27 (m, 3H), 7.24 – 7.17 (m, 4H), 6.35 (d,  $J = 3.1$  Hz, 1H), 6.20 (d,  $J = 3.1$  Hz, 1H), 4.86 (s, 1H), 4.45 (s, 2H), 4.29 (q,  $J = 7.1$  Hz, 2H), 3.67 – 3.51 (m, 2H), 3.39 (d,  $J = 13.7$  Hz, 1H), 3.02 (d,  $J = 13.7$  Hz, 1H), 2.06 (bs, 1H, OH), 1.34 (t,  $J = 7.1$  Hz, 3H).

**$^{13}\text{C}$ -NMR (75 MHz,  $\text{CDCl}_3$ , **3d-endo**)**  $\delta$  174.6, 174.2, 170.6, 154.7, 150.3, 135.4, 131.8, 130.1(2C), 129.3(2C), 128.8, 128.7(2C), 127.5, 126.5(2C), 109.4, 108.8, 72.2, 62.1, 57.4, 57.3, 55.7, 49.7, 41.3, 14.2.

**HRMS (ESI+)**: Calculated for  $\text{C}_{27}\text{H}_{27}\text{N}_2\text{O}_6$ , 475.1864; found, 475.1858.

**Methyl (1*R*,3*R*,3*aS*,6*aR*)-3-(5-(hydroxymethyl)furan-2-yl)-4,6-dioxo-1,5-diphenyloctahydropyrrolo[3,4-*c*]pyrrole-1-carboxylate (**3e**)**

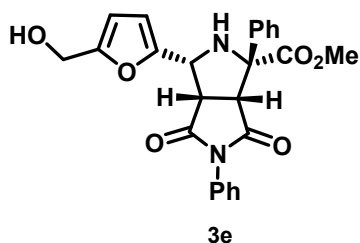

Following the typical procedure 2, the reaction of  $\text{Cu}(\text{CH}_3\text{CN})_4\text{PF}_6$  (6.7 mg,  $1.8 \cdot 10^{-2}$  mmol), (*R*)-Fesulphos (9.2 mg,  $2.0 \cdot 10^{-2}$  mmol), *N*-phenylmaleimide (31.2 mg, 0.18 mmol), **1e** (50 mg, 0.18 mmol) and  $\text{Et}_3\text{N}$  (8  $\mu\text{L}$ ,  $5.4 \cdot 10^{-2}$  mmol) in dichloromethane (5 mL) at 0°C for 12 h, afforded, after purification by silica gel flash chromatography (heptane-AcOEt 1:1) the cycloadduct **3e** (56.3 mg, 70%, white solid).

**M.p.**: 146-148°C.

**$[\alpha]_D^{20}$** : -7.2 ( $c = 0.5$ ,  $\text{CHCl}_3$ ), 97% ee.

**SFC**: Chiralpak IB,  $\text{CO}_2/\text{MeOH}$  from 95-5 to 70/30 in 8 min, flow rate 2 mL/min ( $\lambda = 254$  nm)  $t_R$ : 3.32 min (2*S*,3*S*,3*aR*,6*aS*)-**3e** and 3.54 min (1*R*,3*R*,3*aS*,6*aR*)-**3e**.

**<sup>1</sup>H-NMR (300 MHz, CDCl<sub>3</sub>)**  $\delta$  7.66 – 7.57 (m, 2H), 7.42 – 7.31 (m, 6H), 7.30 – 7.21 (m, 2H), 6.23 (d,  $J$  = 3.2 Hz, 1H), 6.12 (d,  $J$  = 3.2 Hz, 1H), 4.36 (bs, 3H), 4.23 (dd,  $J$  = 7.4, 1.1 Hz, 1H), 3.71 (s, 3H), 3.36 (dd,  $J$  = 8.9, 7.4 Hz, 1H), 2.61 (bs, 1H, OH).

**<sup>13</sup>C-NMR (75 MHz, CDCl<sub>3</sub>)**  $\delta$  175.1, 174.5, 170.7, 154.8, 149.2, 138.0, 131.7, 129.2(2C), 128.9(2C), 128.9, 128.6, 126.8(2C), 126.5(2C), 109.6, 108.6, 73.4, 57.2, 55.2, 53.2, 53.2, 49.9.

**HRMS (ESI+)**: Calculated for C<sub>25</sub>H<sub>23</sub>N<sub>2</sub>O<sub>6</sub>, 447.1551; found, 447.1549.

**Methyl (1*R*,3*R*,3*aS*,6*aR*)-1-tert-butoxymethyl-3-(5-(hydroxymethyl)furan-2-yl)-4,6-dioxo-5-phenyloctahydropyrrolo[3,4-*c*]pyrrole-1-carboxylate (3f)**

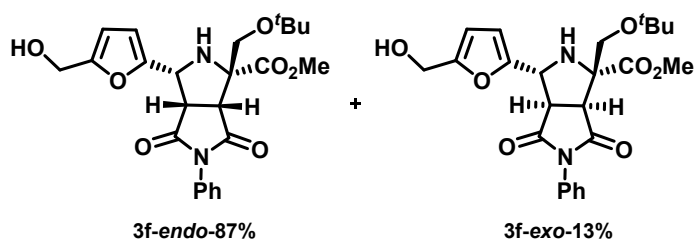

Following the typical procedure 2, the reaction of Cu(CH<sub>3</sub>CN)<sub>4</sub>PF<sub>6</sub> (6.7 mg, 1.8·10<sup>-2</sup> mmol), (*R*)-Fesulphos (9.2 mg, 2.0·10<sup>-2</sup> mmol), *N*-phenylmaleimide (31.2 mg, 0.18 mmol), **1f** (50 mg, 0.18 mmol) and Et<sub>3</sub>N (8  $\mu$ L, 5.4·10<sup>-2</sup> mmol)

in dichloromethane (5 mL) at 0°C for 12 h. The crude mixture was concentrated in vacuo and gave a 86:14 mixture of diastereoisomers **3f-endo** and **3f-exo**. After flash column chromatography (heptane-AcOEt 1:1) a fraction containing 88:12 mixture of **3f-endo** and **3f-exo** could be isolated (61.0 mg, 73%, white solid).

**M.p.**: 103-105°C.

**[ $\alpha$ ]<sub>D</sub><sup>20</sup>**: +87.4 ( $c$  = 0.5, CH<sub>2</sub>Cl<sub>2</sub>), 99% *ee*.

**SFC**: Chiralpak IC, CO<sub>2</sub>/MeOH from 95-5 to 60/40 in 8 min, flow rate 2 mL/min ( $\lambda$ =230 nm)  $t_R$ : 6.24 min (1*S*,3*S*,3*aR*,6*aS*)-**3f-endo** and 6.4 min (1*R*,3*R*,3*aS*,6*aR*)-**3f-endo**.

**<sup>1</sup>H-NMR (300 MHz, CDCl<sub>3</sub>)**  $\delta$  7.46 – 7.34 (m, 3H, **3f-endo**), 7.26 – 7.19 (m, 2H, **3f-endo**), 7.15 – 7.09 (m, 4H, **3f-exo**), 6.61 (d,  $J$  = 5.9 Hz, 1H, **3f-exo**), 6.46 (d,  $J$  = 5.9 Hz, 1H, **3f-exo**), 6.37 (d,  $J$  = 3.1 Hz, 1H, **3f-endo**), 6.21 (d,  $J$  = 3.1 Hz, 1H, **3f-endo**), 4.99 (d,  $J$  = 9.2 Hz, 1H, **3f-endo**), 4.90 (d,  $J$  = 9.2 Hz, 1H, **3f-exo**), 4.57 (d,  $J$  = 7.7 Hz, 1H, **3f-exo**), 4.46 (s, 2H, **3f-endo**), 4.19 – 4.05 (m, 4H, **3f-exo**), 3.90 (d,  $J$  = 2.4 Hz, 1H, **3f-exo**), 3.84 (s, 3H, **3f-endo**), 3.80 (d,  $J$  = 8.0 Hz, 1H, **3f-endo**), 3.75 – 3.68 (m, 2H, **3f-endo**), 3.61 (d,  $J$  = 7.7 Hz, 1H, **3f-exo**), 3.51 (d,  $J$  = 8.0 Hz, 1H, **3f-endo**), 1.22 (s, 9H, **3f-endo**).

**<sup>13</sup>C-NMR (75 MHz, CDCl<sub>3</sub>, 3f-endo)**  $\delta$  175.2, 174.7, 171.0, 154.5, 150.9, 131.9, 129.3(2C), 128.8, 126.5(2C), 109.3, 108.7, 74.0, 71.9, 66.2, 58.4, 57.5, 53.0, 52.8, 50.8, 27.5(3C).

**HRMS (ESI+)**: Calculated for C<sub>24</sub>H<sub>29</sub>N<sub>2</sub>O<sub>7</sub>, 457.1969; found, 457.1964.

**Methyl (1*S*,3*R*,3*aS*,6*aR*)-3-(5-(hydroxymethyl)furan-2-yl)-1-(2-methylthioethyl)-4,6-dioxo-5-phenyloctahydropyrrolo[3,4-*c*]pyrrole-1-carboxylate (3g)**

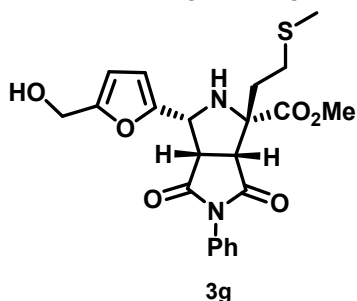

Following the typical procedure 2, the reaction of Cu(CH<sub>3</sub>CN)<sub>4</sub>PF<sub>6</sub> (6.3 mg, 1.7·10<sup>-2</sup> mmol), (*R*)-Fesulphos (8.6 mg, 1.9·10<sup>-2</sup> mmol), *N*-phenylmaleimide (29.4 mg, 0.17 mmol), **1g** (45 mg, 0.17 mmol) and Et<sub>3</sub>N (8  $\mu$ L, 5.1·10<sup>-2</sup> mmol) in dichloromethane (5 mL) at 0°C for 12 h, afforded, after purification by silica gel flash chromatography (heptane-AcOEt 1:1) the cycloadduct **3g** (50.6 mg, 67%, white solid).

**M.p.**: 167-169°C.

**[ $\alpha$ ]<sub>D</sub><sup>20</sup>**: +33.4 ( $c$  = 0.5, CHCl<sub>3</sub>), 88% *ee*.

**SFC**: Chiralpak IB, CO<sub>2</sub>/MeOH from 95-5 to 70/30 in 8 min, flow rate 2 mL/min ( $\lambda$  = 230 nm)  $t_R$ : 3.28 min (2*R*,3*S*,3*aR*,6*aS*)-**3g** and 3.53 min (1*S*,3*R*,3*aS*,6*aR*)-**3g**.

**<sup>1</sup>H-NMR (300 MHz, CDCl<sub>3</sub>)**  $\delta$  7.48 – 7.33 (m, 3H), 7.28 – 7.19 (m, 2H), 6.37 (d,  $J$  = 3.2 Hz, 1H), 6.24 (d,  $J$  = 3.2 Hz, 1H), 4.74 (d,  $J$  = 8.9 Hz, 1H), 4.44 (s, 2H), 3.89 (s, 3H), 3.61 (dd,  $J$  = 8.9, 7.7 Hz, 1H), 3.47 (d,  $J$  = 7.7 Hz, 1H), 2.72 – 2.60 (m, 1H), 2.53 – 2.34 (m, 2H), 2.14 (s, 3H), 1.95 – 1.83 (m, 1H).

**<sup>13</sup>C-NMR (75 MHz, CDCl<sub>3</sub>)** δ 174.5, 174.0, 171.2, 154.9, 149.0, 131.7, 129.3(2C), 129.0, 126.5(2C), 109.9, 108.9, 71.9, 58.2, 57.6, 57.0, 53.2, 50.4, 35.5, 28.9, 15.9.

**HRMS (ESI+):** Calculated for C<sub>22</sub>H<sub>25</sub>N<sub>2</sub>O<sub>6</sub>S, 445.1428; found, 445.1420.

**Methyl (1*S*,3*R*,3*aS*,6*aR*)-1-benzylthiomethyl-3-(5-(hydroxymethyl)furan-2-yl)-4,6-dioxo-5-phenyloctahydropyrrolo[3,4-*c*]pyrrole-1-carboxylate (3h)**

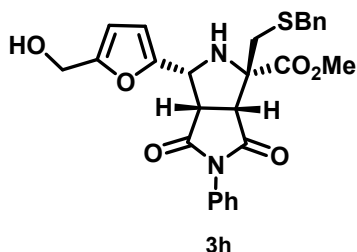

Following the typical procedure 2, the reaction of Cu(CH<sub>3</sub>CN)<sub>4</sub>PF<sub>6</sub> (5.6 mg, 1.5·10<sup>-2</sup> mmol), (*R*)-Fesulphos (7.6 mg, 1.7·10<sup>-2</sup> mmol), *N*-phenylmaleimide (26.0 mg, 0.15 mmol), **1h** (50 mg, 0.15 mmol) and Et<sub>3</sub>N (7 μL, 4.5·10<sup>-2</sup> mmol) in dichloromethane (5 mL) at 0°C for 12 h, afforded, after purification by silica gel flash chromatography (heptane-AcOEt 1:1) the cycloadduct **3h** (64.6 mg, 85%, white solid).

**M.p.:** 105-107°C.

**[α]<sub>D</sub><sup>20</sup>:** +30.7 (c = 1.0, CHCl<sub>3</sub>), 86% ee.

**SFC:** Chiralpak IB, CO<sub>2</sub>/MeOH from 95-5 to 70/30 in 8 min, flow rate 2 mL/min (λ = 210 nm) t<sub>R</sub>: 5.24 min (2*R*,3*S*,3*aR*,6*aS*)-**3h** and 5.65 min (1*S*,3*R*,3*aS*,6*aR*)-**3h**.

**<sup>1</sup>H-NMR (300 MHz, CDCl<sub>3</sub>)** δ 7.36 – 7.27 (m, 6H), 7.24 – 7.18 (m, 2H), 7.16 – 7.09 (m, 2H), 6.24 (d, *J* = 3.2 Hz, 1H), 6.12 (d, *J* = 3.2 Hz, 1H), 4.36 (bs, 3H), 3.79 (d, *J* = 13.8 Hz, 1H), 3.75 (s, 3H), 3.68 (d, *J* = 13.8 Hz, 1H), 3.40 – 3.33 (m, 1H), 3.29 (d, *J* = 7.7 Hz, 1H), 3.01 (d, *J* = 13.6 Hz, 1H), 2.69 (d, *J* = 13.6 Hz, 1H).

**<sup>13</sup>C-NMR (75 MHz, CDCl<sub>3</sub>)** δ 174.2, 174.0, 170.8, 154.7, 149.5, 138.1, 131.7, 129.3(2C), 129.1(2C), 128.9, 128.8(2C), 127.5, 126.5(2C), 109.5, 108.7, 72.6, 57.4, 57.2, 55.3, 53.1, 49.5, 37.2, 36.4.

**HRMS (ESI+):** Calculated for C<sub>27</sub>H<sub>27</sub>N<sub>2</sub>O<sub>6</sub>S, 507.1584; found, 507.1576.

**Methyl (1*S*,3*R*,3*aS*,6*aR*)-3-(5-(hydroxymethyl)furan-2-yl)-4,6-dioxo-5-phenyloctahydropyrrolo[3,4-*c*]pyrrole-1-carboxylate (3i)**

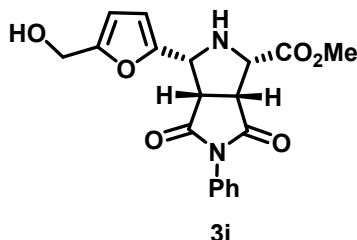

Following the typical procedure 2, the reaction of Cu(CH<sub>3</sub>CN)<sub>4</sub>PF<sub>6</sub> (9.3 mg, 2.5·10<sup>-2</sup> mmol), (*R*)-Fesulphos (12.8 mg, 2.8·10<sup>-2</sup> mmol), *N*-phenylmaleimide (43.3 mg, 0.25 mmol), **1i** (50 mg, 0.25 mmol) and Et<sub>3</sub>N (11 μL, 7.5·10<sup>-2</sup> mmol) in dichloromethane (5 mL) at room temperature for 12 h, afforded, after purification by silica gel flash chromatography (heptane-AcOEt 1:1) the cycloadduct **3i** (65.0 mg, 70%, white solid).

**M.p.:** 130-132°C.

**[α]<sub>D</sub><sup>20</sup>:** +41.0 (c = 0.1, CHCl<sub>3</sub>), >99% ee.

**HPLC:** Chiralpak IC, hexane/*i*PrOH 40/60 in 30 min, flow rate 1 mL/min (λ = 254 nm), t<sub>R</sub>: 10.69 min (1*S*,3*R*,3*aS*,6*aR*)-**3i** and 16.42 min (1*R*,3*S*,3*aR*,6*aS*)-**3i**.

**<sup>1</sup>H-NMR (300 MHz, CDCl<sub>3</sub>)** δ 7.47 – 7.32 (m, 3H), 7.26 – 7.22 (m, 2H), 6.36 (d, *J* = 3.1 Hz, 1H), 6.23 (d, *J* = 3.1 Hz, 1H), 4.64 (d, *J* = 8.8 Hz, 1H), 4.50 (s, 2H), 4.11 (d, *J* = 6.3 Hz, 1H), 3.87 (s, 3H), 3.75 (t, *J* = 7.4 Hz, 1H), 3.59 (t, *J* = 8.3 Hz, 1H), 2.78 (bs, 1H, OH).

**<sup>13</sup>C-NMR (75 MHz, CDCl<sub>3</sub>)** δ 174.9, 174.1, 169.9, 154.7, 149.4, 131.8, 129.3(2C), 128.9, 126.5(2C), 109.4, 108.8, 62.5, 59.3, 57.5, 52.7, 49.6, 49.6.

**HRMS (ESI+):** Calculated for C<sub>19</sub>H<sub>19</sub>N<sub>2</sub>O<sub>6</sub>, 371.1238; found, 371.1239.

**Methyl (1*S*,3*R*,3*aS*,6*aR*)-3-(5-methylfuran-2-yl)-4,6-dioxo-5-phenyloctahydropyrrolo[3,4-*c*]pyrrole-1-carboxylate (3j)**

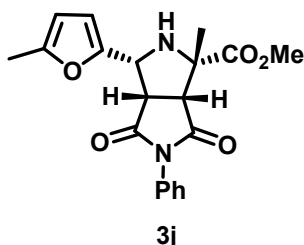

Following the typical procedure 2, the reaction of Cu(CH<sub>3</sub>CN)<sub>4</sub>PF<sub>6</sub> (4.8 mg, 1.3·10<sup>-2</sup> mmol), (*R*)-Fesulphos (6.9 mg, 1.5·10<sup>-2</sup> mmol), *N*-phenylmaleimide (22.5 mg, 0.13 mmol), **1j** (25 mg, 0.13 mmol) and Et<sub>3</sub>N (5 μL, 3.9·10<sup>-2</sup> mmol) in

dichloromethane (5 mL) at room temperature for 12 h, afforded, after purification by silica gel flash chromatography (heptane-AcOEt 3:1) the cycloadduct **3j** (40.5 mg, 86%, white solid).

**M.p.:** 171-174°C.

**[ $\alpha$ ]<sub>D</sub><sup>20</sup>:** +42.0 (c = 0.5, CHCl<sub>3</sub>), 96% ee.

**HPLC:** Chiralpak IBN, hexane/iPrOH 70/30 in 30 min, flow rate 1 mL/min ( $\lambda$  = 230 nm), *t<sub>R</sub>*: 9.24 min (1*R*,3*S*,3*aR*,6*aS*)-**3j** and 12.96 min (1*S*,3*R*,3*aS*,6*aR*)-**3j**.

**<sup>1</sup>H-NMR (300 MHz, CDCl<sub>3</sub>)**  $\delta$  7.50 – 7.38 (m, 4H), 7.29 – 7.24 (m, 1H), 6.34 (d, *J* = 3.2 Hz, 1H), 5.98 – 5.93 (m, 1H), 4.86 (t, *J* = 9.5 Hz, 1H), 3.92 (s, 3H), 3.68 (t, *J* = 7.7 Hz, 1H), 3.54 (d, *J* = 7.7 Hz, 1H), 3.35 (d, *J* = 10.1 Hz, 1H, NH), 2.23 (s, 3H), 1.63 (s, 3H).

**<sup>13</sup>C-NMR (75 MHz, CDCl<sub>3</sub>)**  $\delta$  174.8, 174.0, 172.4, 152.8, 147.2, 131.9, 129.2 (2C), 128.8, 126.5 (2C), 110.0, 106.7, 68.4, 58.5, 57.2, 53.1, 50.3, 24.0, 13.8.

**HRMS (ESI<sup>+</sup>):** Calculated for C<sub>20</sub>H<sub>21</sub>N<sub>2</sub>O<sub>5</sub>, 369.1445; found, 369.1440.

**Methyl (1*S*,3*R*,3*aS*,6*aR*)-4,6-dioxo-5-phenyl-3-(5-(triisopropylsilyloxymethyl)furan-2-yl)octahydropyrrolo[3,4-*c*]pyrrole-1-carboxylate (**3k**)**

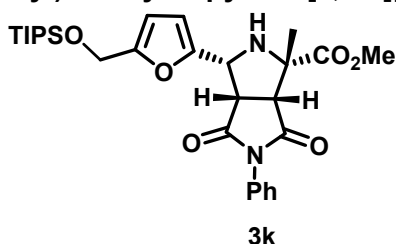

Following the typical procedure 2, the reaction of Cu(CH<sub>3</sub>CN)<sub>4</sub>PF<sub>6</sub> (2.7 mg, 7.2·10<sup>-3</sup> mmol), (*R*)-Fesulphos (3.6 mg, 7.8·10<sup>-3</sup> mmol), *N*-phenylmaleimide (12.1 mg, 6.9·10<sup>-2</sup> mmol), **1i** (25 mg, 6.8·10<sup>-2</sup> mmol) and Et<sub>3</sub>N (5  $\mu$ L, 2.0·10<sup>-2</sup> mmol) in dichloromethane (5 mL) at room temperature for 12 h, afforded, after purification by silica gel flash chromatography (heptane-AcOEt 2:1) the cycloadduct **3i** (21.4 mg, 60%, yellow solid).

**M.p.:** 110-112°C.

**[ $\alpha$ ]<sub>D</sub><sup>20</sup>:** +15.2 (c = 1.0, CHCl<sub>3</sub>), 97% ee.

**HPLC:** Chiralpak IBN, hexane/iPrOH 80/20 in 30 min, flow rate 1 mL/min ( $\lambda$  = 250 nm), *t<sub>R</sub>*: 7.10 min (1*R*,3*S*,3*aR*,6*aS*)-**3k** and 8.48 min (1*S*,3*R*,3*aS*,6*aR*)-**3k**.

**<sup>1</sup>H-NMR (300 MHz, CDCl<sub>3</sub>)**  $\delta$  7.44 – 7.34 (m, 3H), 7.25 – 7.18 (m, 2H), 6.35 (d, *J* = 3.2 Hz, 1H), 6.20 (d, *J* = 3.2 Hz, 1H), 4.82 (dd, *J* = 11.0, 9.0 Hz, 1H), 4.58 (d, *J* = 4.4 Hz, 2H), 3.86 (s, 3H), 3.63 (dd, *J* = 9.0, 7.7 Hz, 1H), 3.46 (d, *J* = 7.7 Hz, 1H), 3.28 (d, *J* = 11.0 Hz, 1H, NH), 1.57 (s, 3H), 1.15 – 0.95 (m, 18H).

**<sup>13</sup>C-NMR (75 MHz, CDCl<sub>3</sub>)**  $\delta$  174.7, 173.7, 172.1, 155.3, 148.2, 131.9, 129.1 (2C), 128.7, 126.4 (2C), 109.6, 107.4, 68.4, 58.7, 58.3, 57.0, 53.0, 50.31, 24.0, 18.0 (6C), 12.1 (3C).

**HRMS (ESI<sup>+</sup>):** Calculated for C<sub>29</sub>H<sub>41</sub>N<sub>2</sub>O<sub>6</sub>Si, 541.2728; found, 541.2723.

**Methyl (1*S*,3*R*,3*aS*,6*aR*)-3-(5-((methoxymethoxy)methyl)furan-2-yl)-4,6-dioxo-5-phenyloctahydropyrrolo[3,4-*c*]pyrrole-1-carboxylate (**3l**)**

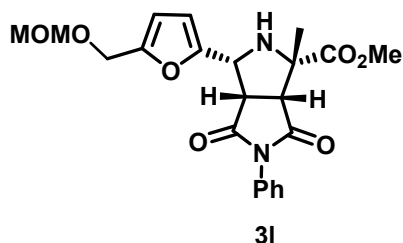

Following the typical procedure 2, the reaction of Cu(CH<sub>3</sub>CN)<sub>4</sub>PF<sub>6</sub> (4.3 mg, 1.1·10<sup>-2</sup> mmol), (*R*)-Fesulphos (5.9 mg, 1.3·10<sup>-2</sup> mmol), *N*-phenylmaleimide (20.3 mg, 0.11 mmol), **1l** (30 mg, 0.11 mmol) and Et<sub>3</sub>N (11  $\mu$ L, 7.5·10<sup>-2</sup> mmol) in dichloromethane (5 mL) at room temperature for 12 h, afforded, after purification by silica gel flash chromatography (heptane-AcOEt 3:1) the cycloadduct **3l** (30.2 mg, 60%, yellow solid).

**M.p.:** 154-157°C

**[ $\alpha$ ]<sub>D</sub><sup>20</sup>:** +87.6 (c = 0.5, CHCl<sub>3</sub>), 97% ee.

**HPLC:** Chiralpak IBN, hexane/iPrOH 70/30 in 30 min, flow rate 1 mL/min ( $\lambda$  = 230 nm), *t<sub>R</sub>*: 14.50 min (1*R*,3*S*,3*aR*,6*aS*)-**3l** and 18.54 min (1*S*,3*R*,3*aS*,6*aR*)-**3l**.

**<sup>1</sup>H-NMR (300 MHz, CDCl<sub>3</sub>)**  $\delta$  7.47 – 7.31 (m, 3H), 7.25 (d, *J* = 5.3 Hz, 2H), 6.37 (d, *J* = 3.2 Hz, 1H), 6.29 (d, *J* = 3.2 Hz, 1H), 4.84 (t, *J* = 9.1 Hz, 1H), 4.57 (d, *J* = 6.7 Hz, 1H), 4.51 (d, *J* = 6.7 Hz, 1H), 4.43 (d, *J* = 5.5 Hz, 2H), 3.86 (s, 3H), 3.64 (d, *J* = 8.6 Hz, 1H), 3.47 (d, *J* = 7.8 Hz, 1H), 3.34 (s, 3H), 1.58 (s, 3H).

**<sup>13</sup>C-NMR (75 MHz, CDCl<sub>3</sub>)**  $\delta$  174.8, 173.8, 172.3, 151.9, 149.8, 131.8, 129.2(2C), 128.8, 126.6(2C), 110.7, 109.5, 95.0, 68.5, 60.7, 58.2, 56.9, 55.5, 53.1, 50.3, 24.0.

**HRMS (ESI<sup>+</sup>):** Calculated for C<sub>22</sub>H<sub>25</sub>N<sub>2</sub>O<sub>7</sub>, 429.1656; found, 429.1659.

**Trimethyl (2*S*,3*S*,4*S*,5*R*)-5-(5-(hydroxymethyl)furan-2-yl)pyrrolidine-2,3,4-tricarboxylate (9)**

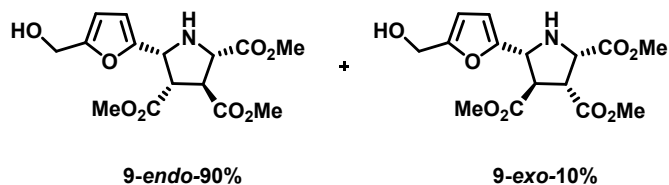

Following the typical procedure 2, the reaction of Cu(CH<sub>3</sub>CN)<sub>4</sub>PF<sub>6</sub> (8.9 mg, 2.4·10<sup>-2</sup> mmol), (*R*)-Fesulphos (11.9 mg, 2.6·10<sup>-2</sup> mmol), dimethyl fumarate (34.6 mg, 0.24 mmol), **1i** (48 mg, 0.24

mmol) and Et<sub>3</sub>N (10  $\mu$ L, 7.0·10<sup>-2</sup> mmol) in THF (5 mL) at room temperature for 12 h. The crude mixture was concentrated in vacuo and gave a 80:20 mixture of diastereoisomers **9-endo** and **9-exo**. After flash column chromatography (heptane-AcOEt 1:2) a fraction containing 90:10 mixture of **9-endo** and **9-exo** could be isolated (41.5 mg, 51%, yellow oil).

**[ $\alpha$ ]<sub>D</sub><sup>25</sup>:** +21.4 (c=0.5, CHCl<sub>3</sub>), 93% *ee*.

**HPLC:** Chiralpak IBN, hexane/iPrOH 70/30 in 15 min, flow rate 1 mL/min ( $\lambda$  = 230 nm), *t<sub>R</sub>*: 6.07 min (2*S*,3*S*,4*S*,5*R*)-**9** and 7.01 min (2*R*,3*R*,4*R*,5*S*)-**9**.

**<sup>1</sup>H-NMR (300 MHz, CDCl<sub>3</sub>)**  $\delta$  6.30 (d, *J* = 3.3 Hz, 1H, **9-exo**), 6.23 (d, *J* = 3.2 Hz, 1H, **9-exo**), 6.20 (d, *J* = 3.2 Hz, 1H, **9-endo**), 6.18 (d, *J* = 3.2 Hz, 1H, **9-endo**), 4.66 (d, *J* = 8.0 Hz, 1H, **9-endo**), 4.58 (s, 2H, **9-exo**), 4.51 (s, 2H, **9-endo**), 4.18 (d, *J* = 7.2 Hz, 1H, **9-endo**), 3.80 (s, 3H, **9-endo**), 3.77 (s, 3H, **9-endo**), 3.73 (s, 3H, **9-exo**), 3.70 (d, *J* = 1.9 Hz, 1H, **9-endo**), 3.61 (t, *J* = 7.2 Hz, 1H, **9-endo**), 3.52 (s, 3H, **9-endo**), 2.41 (s, 1H, OH).

**<sup>13</sup>C-NMR (75 MHz, CDCl<sub>3</sub>, 9-endo)**  $\delta$  172.9, 172.7, 171.4, 154.2, 151.6, 108.6, 108.4, 62.7, 59.0, 57.2, 52.9, 52.8, 52.5, 52.4, 49.6.

**HRMS (ESI<sup>+</sup>):** Calculated for C<sub>15</sub>H<sub>20</sub>NO<sub>8</sub>, 342.1183; found, 342.1180.

**Trimethyl (2*S*,3*S*,4*S*,5*R*)-5-(5-(hydroxymethyl)furan-2-yl)-2-methylpyrrolidine-2,3,4-tricarboxylate (10)**

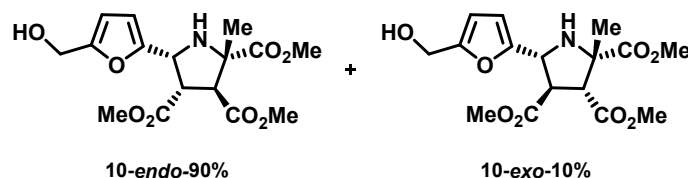

Following the typical procedure 2, the reaction of Cu(CH<sub>3</sub>CN)<sub>4</sub>PF<sub>6</sub> (7.5 mg, 2.0·10<sup>-2</sup> mmol), (*R*)-Fesulphos (10.1 mg, 2.2·10<sup>-2</sup> mmol), dimethyl fumarate (28.9 mg, 0.20 mmol),

**1a** (43 mg, 0.20 mmol) and Et<sub>3</sub>N (9  $\mu$ L, 6.0·10<sup>-2</sup> mmol) in THF (5 mL) at room temperature for 12 h. The crude mixture was concentrated in vacuo and gave a 85:15 mixture of diastereoisomers **10-endo** and **10-exo**. After flash column chromatography (heptane-AcOEt 1:1) a fraction containing 90:10 mixture of **10-endo** and **10-exo** could be isolated (40.0 mg, 56%, yellow oil).

**[ $\alpha$ ]<sub>D</sub><sup>20</sup>:** +19.0, (c=0.5, CHCl<sub>3</sub>), 80% *ee*.

**HPLC:** Chiralpak IBN, hexane/iPrOH 80/20 in 30 min, flow rate 0.8 mL/min ( $\lambda$  = 210 nm), *t<sub>R</sub>*: 8.56 min (2*S*,3*S*,4*S*,5*R*)-**10-endo** and 9.11 min (2*R*,3*R*,4*R*,5*S*)-**10-endo**.

**6.22** (d, *J* = 3.2 Hz, 1H), **6.19** (d, *J* = 3.3 Hz, 1H), **4.54** (s, 2H), **3.70** (s, 3H), **3.67** (s, 3H), **3.64** (s, 3H),

**<sup>1</sup>H-NMR (300 MHz, CDCl<sub>3</sub>)**  $\delta$  6.22 (d, *J* = 3.3 Hz, 1H, **10-exo**), 6.19 (d, *J* = 3.3 Hz, 1H, **10-exo**), 6.13 (d, *J* = 3.3 Hz, 1H, **10-endo**), 6.11 (d, *J* = 3.3 Hz, 1H, **10-endo**), 4.71 (d, *J* = 8.1 Hz, 1H, **10-endo**), 4.54 (s, 2H, **10-exo**), 4.47 (s, 2H, **10-endo**), 4.09 (d, *J* = 10.3 Hz, 1H, **10-endo**), 3.85 (dd, *J* = 10.3, 8.1 Hz, 1H, **10-endo**), 3.76 (s, 3H, **10-endo**), 3.74 (s, 3H, **10-endo**), 3.70 (s, 3H, **10-exo**), 3.67 (s, 3H, **10-exo**), 3.64 (s, 3H, **10-exo**), 3.51 (s, 3H, **10-endo**), 2.47 (bs, OH, **10-endo** + **10-exo**), 1.31 (s, 3H, **10-endo**), 1.24 (s, 3H, **10-exo**).

**<sup>13</sup>C-NMR (75 MHz, CDCl<sub>3</sub>, 9-endo)** δ 175.7, 171.6, 171.0, 154.0, 153.3, 108.4, 108.3, 66.8, 57.4, 56.6, 53.2, 52.4, 52.3, 51.8, 51.1, 23.3.

**HRMS (ESI+):** Calculated for C<sub>16</sub>H<sub>22</sub>NO<sub>8</sub>, 356.1340; found, 356.1341.

**Trimethyl (2*S*,3*R*,4*S*,5*R*)-5-(5-(hydroxymethyl)furan-2-yl)pyrrolidine-2,3,4-tricarboxylate (11)**

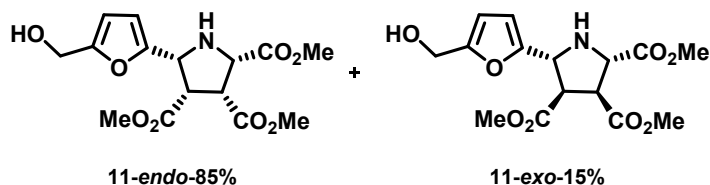

Following the typical procedure 2, the reaction of Cu(CH<sub>3</sub>CN)<sub>4</sub>PF<sub>6</sub> (5.6 mg, 1.5·10<sup>-2</sup> mmol), (*R*)-Fesulphos (7.8 mg, 1.7·10<sup>-2</sup> mmol), dimethyl maleate (38 μL, 0.30

mmol), **1i** (30 mg, 0.15 mmol) and Et<sub>3</sub>N (7 μL, 4.5·10<sup>-2</sup> mmol) in THF (5 mL) at room temperature for 12 h. The crude mixture was concentrated in vacuo and gave a 80:20 mixture of diastereoisomers **11-endo** and **11-exo**. After flash column chromatography (heptane-AcOEt 1:2) a fraction containing 85:15 mixture of **11-endo** and **11-exo** could be isolated (24.0 mg, 47%, yellow oil).

**[α]<sub>D</sub><sup>20</sup>:** +21.0 (c=0.5, CHCl<sub>3</sub>), 83% ee.

**HPLC:** Chiralpak IBN, hexane/iPrOH 70/30 in 30 min, flow rate 1 mL/min (λ = 230 nm), t<sub>R</sub>: 8.87 min (2*R*,3*S*,4*R*,5*S*)-**11-endo** and 12.28 min (2*S*,3*R*,4*S*,5*R*)-**11-endo**.

**<sup>1</sup>H-NMR (300 MHz, CDCl<sub>3</sub>)** δ 6.26 (d, *J* = 3.3 Hz, 1H, **11-endo**), 6.20 (d, *J* = 3.3 Hz, 1H, **11-endo**), 6.06 – 6.00 (m, 2H, **11-exo**), 5.18 (d, *J* = 6.7 Hz, 1H, **11-exo**), 4.85 (d, *J* = 6.9 Hz, 1H, **11-exo**), 4.52 (s, 2H, **11-endo**), 4.47 (d, *J* = 7.1 Hz, 1H, **11-endo**), 4.36 (s, 2H, **11-exo**), 4.28 (d, *J* = 6.8 Hz, 1H, **11-exo**), 4.11 (d, *J* = 8.9 Hz, 1H, **11-endo**), 3.78 (s, 3H, **11-endo**), 3.83 (s, 3H, **11-exo**), 3.76 – 3.72 (m, 1H, **11-exo**), 3.71 (s, 3H, **11-exo**), 3.68 (s, 3H, **11-endo**), 3.66 – 3.61 (m, 1H, **11-endo**), 3.53 – 3.49 (m, 1H, **11-endo**), 3.49 (s, 3H, **11-endo**), 3.39 (s, 3H, **11-exo**), 2.63 (bs, 1H, OH).

**<sup>13</sup>C-NMR (75 MHz, CDCl<sub>3</sub>)** δ 171.2 (**11-exo**), 171.1 (**11-endo**), 170.9 (**11-endo**), 170.6 (**11-endo**), 170.5 (**11-exo**), 169.8 (**11-exo**), 154.0 (**11-endo**), 152.6 (**11-exo**), 150.7 (**11-endo**), 147.6 (**11-exo**), 112.5 (**11-exo**), 108.6 (**11-endo**), 108.4 (**11-endo**), 61.9 (**11-endo**), 60.0 (**11-exo**), 59.5 (**11-endo**), 58.7 (**11-exo**), 57.4 (**11-endo**), 57.3 (**11-exo**), 52.9 (**11-exo**), 52.7 (**11-endo**), 52.5 (**11-exo**), 52.3 (**11-endo**), 52.0 (**11-endo**), 51.9 (**11-exo**), 51.6 (**11-exo**), 51.1 (**11-endo**), 50.6 (**11-endo**), 48.8 (**11-exo**).

**HRMS (ESI+):** Calculated for C<sub>15</sub>H<sub>20</sub>NO<sub>8</sub>, 342.1183; found, 342.1179.

**Dimethyl (2*S*,4*S*,5*R*)-5-(5-(hydroxymethyl)furan-2-yl)pyrrolidine-2,4-dicarboxylate (12)**

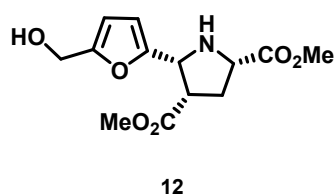

Following the typical procedure 2, the reaction of Cu(CH<sub>3</sub>CN)<sub>4</sub>PF<sub>6</sub> (5.6 mg, 1.5·10<sup>-2</sup> mmol), (*R*)-Fesulphos (7.8 mg, 1.7·10<sup>-2</sup> mmol), methyl acrylate (28 μL, 0.30 mmol), **1i** (30 mg, 0.15 mmol) and Et<sub>3</sub>N (7 μL, 4.5·10<sup>-2</sup> mmol) in THF (5 mL) at 0°C for 12 h, afforded, after purification by silica gel flash chromatography (heptane-AcOEt 1:1) the cycloadduct **12** (21.2 mg, 51%, yellow oil).

**[α]<sub>D</sub><sup>20</sup>:** +22.8 (c=0.5, CHCl<sub>3</sub>), 88% ee.

**HPLC:** Chiralpak IBN, hexane/iPrOH 70/30 in 15 min, flow rate 1 mL/min (λ = 230 nm), t<sub>R</sub>: 5.54 min (2*R*,4*R*,5*S*)-**12** and 6.59 min (2*S*,4*S*,5*R*)-**12**.

**<sup>1</sup>H-NMR (300 MHz, CDCl<sub>3</sub>)** δ 6.19 (d, *J* = 3.3 Hz, 1H), 6.16 (d, *J* = 3.3 Hz, 1H), 4.52 (d, *J* = 7.3 Hz, 1H), 4.48 (s, 2H), 3.94 (t, *J* = 8.1 Hz, 1H), 3.77 (s, 3H), 3.50 (s, 3H), 3.26 (q, *J* = 7.3 Hz, 1H), 2.61 (bs, 1H, OH), 2.41 (td, *J* = 8.1, 1.5 Hz, 2H).

**<sup>13</sup>C-NMR (75 MHz, CDCl<sub>3</sub>)** δ 174.4, 172.8, 154.0, 152.6, 108.4, 108.2, 59.3, 59.2, 57.3, 52.6, 52.1, 48.4, 32.1.

**HRMS (ESI+):** Calculated for C<sub>13</sub>H<sub>18</sub>NO<sub>6</sub>, 284.1129; found, 284.1123.

**Methyl (2*S*,4*S*,5*R*)-4-ethyl-4-formyl-5-(5-(hydroxymethyl)furan-2-yl)pyrrolidine-2-carboxylate (**13**)**

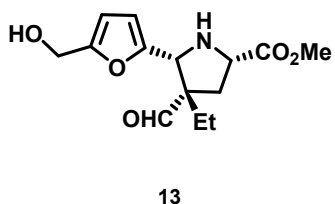

Following the typical procedure 2, the reaction of  $\text{Cu}(\text{CH}_3\text{CN})_4\text{PF}_6$  (5.6 mg,  $1.5 \cdot 10^{-2}$  mmol), (*R*)-Fesulphos (7.8 mg,  $1.7 \cdot 10^{-2}$  mmol), 2-ethylacrolein (30  $\mu\text{L}$ , 0.30 mmol), **1i** (30 mg, 0.15 mmol) and  $\text{Et}_3\text{N}$  (7  $\mu\text{L}$ ,  $4.5 \cdot 10^{-2}$  mmol) in DCM (5 mL) at room temperature for 12 h, afforded, after purification by silica gel flash chromatography (heptane-AcOEt 2:3) the cycloadduct **13** (17.4 mg, 41%, yellow oil).

$[\alpha]_{\text{D}}^{25}$ : +14.0 ( $c=0.5$ ,  $\text{CHCl}_3$ ), 91% ee.

**HPLC**: Chiralpak IBN, hexane/*i*PrOH 70/30 in 30 min, flow rate 1 mL/min ( $\lambda = 230$  nm),  $t_{\text{R}}$ : 4.76 min (2*S*,4*S*,5*R*)-**13** and 7.73 min (2*R*,4*R*,5*S*)-**13**.

**$^1\text{H-NMR}$  (300 MHz,  $\text{CDCl}_3$ )**  $\delta$  9.15 (s, 1H), 6.27 (d,  $J = 3.2$  Hz, 1H), 6.20 (d,  $J = 3.2$  Hz, 1H), 4.52 (s, 2H), 4.13 (s, 1H), 3.96 (dd,  $J = 9.9, 5.6$  Hz, 1H), 3.77 (s, 3H), 2.58 (dd,  $J = 13.4, 5.6$  Hz, 1H), 2.10 – 1.93 (m, 2H), 1.58 (dq,  $J = 14.7, 7.5$  Hz, 1H), 0.84 (t,  $J = 7.5$  Hz, 3H).

**$^{13}\text{C-NMR}$  (75 MHz,  $\text{CDCl}_3$ )**  $\delta$  204.0, 174.2, 154.7, 150.1, 109.3, 108.4, 65.2, 61.3, 58.3, 57.2, 52.6, 34.1, 26.4, 9.8.

**HRMS (ESI+)**: Calculated for  $\text{C}_{14}\text{H}_{20}\text{NO}_5$ , 282.1336; found, 282.1334.

**Methyl (2*S*,3*R*,4*S*,5*R*)-4-benzoyl-5-(5-(hydroxymethyl)furan-2-yl)-3-phenylpyrrolidine-2-carboxylate (**14**)**

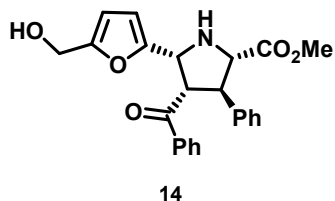

Following the typical procedure 2, the reaction of  $\text{Cu}(\text{CH}_3\text{CN})_4\text{PF}_6$  (5.6 mg,  $1.5 \cdot 10^{-2}$  mmol), (*R*)-Fesulphos (7.8 mg,  $1.7 \cdot 10^{-2}$  mmol), *trans* chalcone (31.2 mg, 0.15 mmol), **1i** (30 mg, 0.15 mmol) and  $\text{Et}_3\text{N}$  (7  $\mu\text{L}$ ,  $4.5 \cdot 10^{-2}$  mmol) in THF (5 mL) at 0°C for 12 h, afforded, after purification by silica gel flash chromatography (heptane-AcOEt 2:1) the cycloadduct **14** (27.4 mg, 45%, yellow oil).

yellow oil).

$[\alpha]_{\text{D}}^{20}$ : -32.0 ( $c=0.5$ ,  $\text{CHCl}_3$ ), 80% ee.

**HPLC**: Chiralpak IBN, hexane/*i*PrOH 70/30 in 30 min, flow rate 1 mL/min ( $\lambda = 230$  nm),  $t_{\text{R}}$ : 5.07 min (2*R*,3*S*,4*R*,5*S*)-**14** and 11.17 min (2*S*,3*R*,4*S*,5*R*)-**14**.

**$^1\text{H-NMR}$  (300 MHz,  $\text{CDCl}_3$ )**  $\delta$  7.77 – 7.72 (m, 2H), 7.50 – 7.43 (m, 2H), 7.41 – 7.30 (m, 6H), 6.05 (d,  $J = 3.3$  Hz, 1H), 5.97 (d,  $J = 3.3$  Hz, 1H), 4.99 (d,  $J = 8.1$  Hz, 1H), 4.45 (t,  $J = 7.6$  Hz, 1H), 4.27 (d,  $J = 4.9$  Hz, 2H), 4.23 – 4.16 (m, 1H), 4.12 (d,  $J = 8.1$  Hz, 1H), 3.73 (s, 3H), 2.45 (bs, 1H, OH).

**$^{13}\text{C-NMR}$  (75 MHz,  $\text{CDCl}_3$ )**  $\delta$  198.0, 174.0, 153.6, 152.0, 141.2, 136.9, 133.2, 129.0(2C), 128.5(2C), 128.3(2C), 127.9(2C), 127.3, 108.8, 108.3, 67.3, 60.4, 59.3, 57.2, 52.6, 51.3.

**HRMS (ESI+)**: Calculated for  $\text{C}_{24}\text{H}_{24}\text{NO}_5$ , 406.1649; found, 406.1642.

**Methyl (2*S*,3*R*,4*R*,5*R*)-5-(5-(hydroxymethyl)furan-2-yl)-3-(4-methoxyphenyl)-2-methyl-4-nitropyrrolidine-2-carboxylate (**15**)**

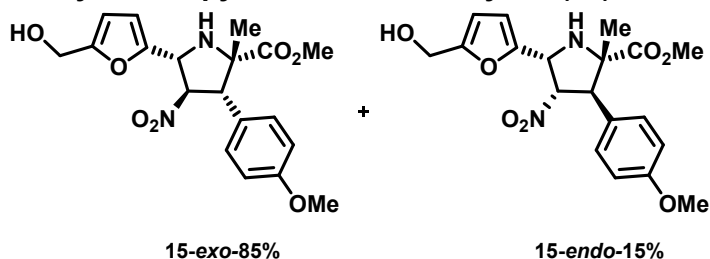

15-*exo*-85%

15-*endo*-15%

Following the typical procedure 2, the reaction of  $\text{Cu}(\text{CH}_3\text{CN})_4\text{PF}_6$  (5.2 mg,  $1.4 \cdot 10^{-2}$  mmol), (*R*)-Fesulphos (6.9 mg,  $1.5 \cdot 10^{-2}$  mmol), *trans*-4-methoxy- $\beta$ -nitrostyrene (25.1, 0.14 mmol), **1a** (30 mg, 0.14 mmol) and  $\text{Et}_3\text{N}$

(6  $\mu\text{L}$ ,  $4.2 \cdot 10^{-2}$  mmol) in THF (5 mL) at -10°C for 12 h. The crude mixture was concentrated in vacuo and gave a 80:20 mixture of diastereoisomers **15-*exo*** and **15-*endo***

**endo.** After flash column chromatography (heptane-AcOEt 2:1) a fraction containing 85:15 mixture of **15-exo** and **15-endo** could be isolated (25.0 mg, , 46%, yellow solid).

**M.p.:** 140-142°C

**[ $\alpha$ ]<sub>D</sub><sup>20</sup>:** -17.8, (c=0.5, CHCl<sub>3</sub>) 95% ee.

**HPLC:** Chiralpak IBN, hexane/iPrOH 70/30 in 30 min, flow rate 1 mL/min ( $\lambda$  = 230 nm),  $t_R$ : 7.50 min (2*R*,3*S*,4*S*,5*S*)-**15** and 9.86 min (2*S*,3*R*,4*R*,5*R*)-**15**.

**<sup>1</sup>H-NMR (300 MHz, CDCl<sub>3</sub>)**  $\delta$  7.20 (d,  $J$  = 8.7 Hz, 2H, **15-exo**), 7.14 (d,  $J$  = 8.7 Hz, 2H, **15-endo**), 6.89 (d,  $J$  = 8.7 Hz, 2H, **15-exo**), 6.86-6.83 (m, 2H, **15-endo**), 6.41 (d,  $J$  = 3.2 Hz, 1H, **15-endo**), 6.32 (d,  $J$  = 3.2 Hz, 1H, **15-exo**), 6.29 (d,  $J$  = 3.3 Hz, 1H, **15-endo**), 6.22 (d,  $J$  = 3.3 Hz, 1H, **15-exo**), 5.57 (dd,  $J$  = 8.1, 7.3 Hz, 1H, **15-exo**), 5.51 – 5.43 (m, 1H, **15-endo**), 5.00 (d,  $J$  = 7.1 Hz, 1H, **15-exo**), 4.87 (d,  $J$  = 9.0 Hz, 1H, **15-endo**), 4.61 (d,  $J$  = 8.3 Hz, 1H, **15-exo**), 4.57 (s, 1H, **15-endo**), 4.55 (s, 2H, **15-exo**), 4.41 (d,  $J$  = 7.9 Hz, 1H, **15-endo**), 3.83 (s, 3H, **15-exo**), 3.80 (s, 3H, **15-exo**), 3.79 (s, 3H, **15-endo**), 2.19 (s, 1H, OH), 1.14 (s, 3H, **15-endo**), 1.08 (s, 3H, **15-exo**). Contains Acetone and Ethyl Acetate.

**<sup>13</sup>C-NMR (75 MHz, CDCl<sub>3</sub>, **15-exo**)**  $\delta$  175.8, 159.4, 154.7, 149.8, 129.9(2C), 127.2, 114.3(2C), 109.7, 108.8, 92.6, 68.2, 58.6, 57.5, 55.4, 53.8, 53.1, 23.9.

**HRMS (ESI+):** Calculated for C<sub>19</sub>H<sub>23</sub>N<sub>2</sub>O<sub>7</sub>, 391.1500; found, 391.1494.

#### 4. Preparation of racemic products for HPLC analysis.

The racemic pyrrolidines were prepared according to the general procedure, but using PPh<sub>3</sub> as ligand. The samples for HPLC analysis were dissolved in isopropyl alcohol and used as quickly as possible to minimize the formation of decomposition products.

#### 5. Additional transformations

##### Typical Procedure 3: Methyl 5-(5-(hydroxymethyl)furan-2-yl)-1*H*-pyrrole-2-carboxylate (**17**)

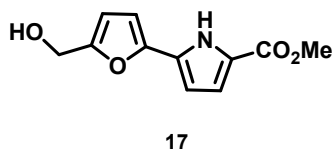

To a suspension of [Cu(CH<sub>3</sub>CN)<sub>4</sub>]PF<sub>6</sub> (18.6 mg, 5.0·10<sup>-2</sup> mmol), PPh<sub>3</sub> (14.4 mg, 5.5·10<sup>-2</sup> mmol), *trans*-1,2-bis(phenylsulfonyl)ethylene (**16**, 154.2, 0.50 mmol) and **1i** (100 mg, 0.50 mmol) in anhydrous THF (5 mL) under argon atmosphere, Et<sub>3</sub>N (21 μL, 1.5·10<sup>-1</sup> mmol) was

added. The resulting mixture was stirred at room temperature for 5 h and DBU (0.15 mL, 1.02 mmol) was added. After stirring for 30 min the resulting mixture was filtered over celite® and the solvent was removed under reduced pressure. The crude mixture was purified by flash chromatography, (heptane:AcOEt 3:1) to afford **17** (50.0 mg, 47%, brown oil).

**<sup>1</sup>H-NMR (300 MHz, CDCl<sub>3</sub>)** δ 9.65 (bs, 1H, NH), 6.90 (dd, *J* = 3.9, 2.3 Hz, 1H), 6.45 (d, *J* = 3.3 Hz, 1H), 6.41 (dd, *J* = 3.9, 2.3 Hz, 1H), 6.33 (d, *J* = 3.3 Hz, 1H), 4.65 (s, 2H), 3.86 (s, 3H).

**<sup>13</sup>C-NMR (75 MHz, CDCl<sub>3</sub>)** δ 161.7, 153.4, 146.8, 128.4, 122.4, 116.9, 110.0, 107.2, 106.1, 57.3, 51.7.

**HRMS (ESI<sup>+</sup>):** Calculated for C<sub>11</sub>H<sub>12</sub>NO<sub>4</sub>, 222.0761; found, 222.0756.

##### Typical Procedure 4: (±)-Methyl 1-methyl-4,6-dioxo-5-phenyl-3-(5-(2,4,6-trimethylbenzyl)furan-2-yl)octahydropyrrolo[3,4-*c*]pyrrole-1-carboxylate (**18**)

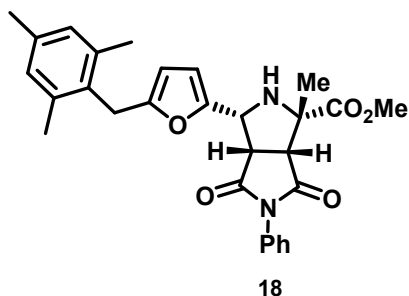

To a suspension of compound **3a** (77 mg, 0.20 mmol), in DCE/HFIP (1 mL:1.2 mL), mesitylene (0.29 mL, 2.0 mmol) and NOBF<sub>4</sub> (50 μL, 1.0·10<sup>-2</sup> mmol, 0.2 M in sulfolane<sup>2</sup>) were added. The mixture was stirred at 80°C for 1,5 h and the solvent was evaporated under reduced pressure. The crude mixture was purified by flash chromatography, (heptane:AcOEt 2:1) to afford **18** (65.3 mg, 67%, colorless oil).

**<sup>1</sup>H-NMR (300 MHz, CDCl<sub>3</sub>)** δ 7.51 – 7.41 (m, 2H), 7.39 – 7.26 (m, 3H), 6.82 (s, 2H), 6.23 (d, *J* = 3.1 Hz, 1H), 5.51 (d, *J* = 2.2 Hz, 1H), 4.82 (d, *J* = 9.1 Hz, 1H), 3.89 (s, 3H), 3.83 (d, *J* = 16.7 Hz, 1H), 3.70 – 3.61 (m, 2H), 3.49 (d, *J* = 7.8 Hz, 1H), 2.25 (s, 3H), 2.11 (s, 6H), 1.59 (s, 3H).

**<sup>13</sup>C-NMR (75 MHz, CDCl<sub>3</sub>)** δ 174.8, 173.7, 172.4, 155.0, 147.3, 137.1(2C), 136.1, 132.0, 131.0, 129.1(2C), 128.9(2C), 128.8, 126.45(2C), 109.9, 106.3, 68.6, 58.5, 57.1, 53.1, 50.5, 28.4, 24.1, 21.0, 19.7(2C).

**HRMS (ESI<sup>+</sup>):** Calculated for C<sub>29</sub>H<sub>31</sub>N<sub>2</sub>O<sub>5</sub>, 487.2227; found, 487.2224.

##### (±)-Methyl

##### 3-(5-(4-methoxybenzyl)furan-2-yl)-1-methyl-4,6-dioxo-5-phenyloctahydropyrrolo[3,4-*c*]pyrrole-1-carboxylate (**19**)

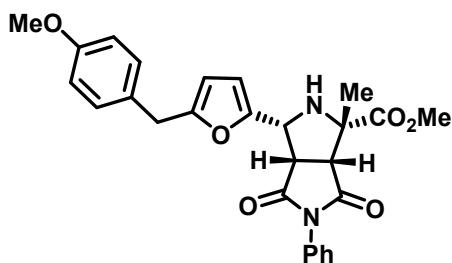

Following the typical procedure 4, the reaction of **3a** (77 mg, 0.20 mmol), anisole (0.22 mL, 2.0 mmol)

and NOBF<sub>4</sub> (50  $\mu$ L,  $1.0 \cdot 10^{-2}$  mmol, 0.2 M) in DCE/HFIP (1 mL:1.2 mL) at 80°C for 1.5 h afforded, after purification by silica gel flash chromatography (heptane-AcOEt 1:1) the cycloadduct **19** (50.3 mg, 53%, yellow oil).

**<sup>1</sup>H-NMR (300 MHz, CDCl<sub>3</sub>)**  $\delta$  7.40 – 7.33 (m, 3H), 7.22 – 7.15 (m, 2H), 7.05 (d,  $J$  = 8.5 Hz, 2H), 6.78 (d,  $J$  = 8.5 Hz, 2H), 6.31 (d,  $J$  = 3.2 Hz, 1H), 5.88 (d,  $J$  = 3.2 Hz, 1H), 4.82 (d,  $J$  = 9.0 Hz, 1H), 3.86 (s, 3H), 3.81 (s, 2H), 3.76 (s, 3H), 3.65 (dd,  $J$  = 9.0, 7.7 Hz, 1H), 3.47 (d,  $J$  = 7.7 Hz, 1H), 1.58 (s, 3H).

**<sup>13</sup>C-NMR (75 MHz, CDCl<sub>3</sub>)**  $\delta$  174.8, 173.8, 172.3, 158.4, 155.7, 147.9, 129.7(2C), 129.4, 129.2(2C), 128.7, 126.6, 126.5(2C), 114.0(2C), 109.8, 107.4, 68.5, 58.4, 57.1, 55.4, 53.1, 50.4, 33.6, 24.1.

**HRMS (ESI<sup>+</sup>):** Calculated for C<sub>27</sub>H<sub>27</sub>N<sub>2</sub>O<sub>6</sub>, 475.1864; found, 475.1859.

**Typical Procedure 5: (±)-Methyl 1-methyl-4,6-dioxo-3-(5-(phenethoxymethyl)furan-2-yl)-5-phenyloctahydropyrrolo[3,4-*c*]pyrrole-1-carboxylate (**20**)**

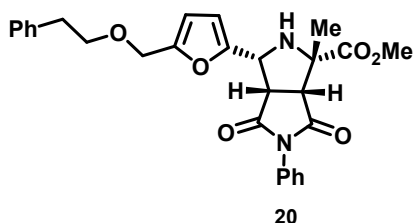

To a suspension of Yb(OTf)<sub>3</sub> (16.1 mg,  $2.6 \cdot 10^{-2}$  mmol) and **3a** (100 mg, 0.26 mmol) in anhydrous MeCN (2 mL) under argon atmosphere, a solution of phenylethyl alcohol (0.16 mL, 1.3 mmol) was added. The resulting mixture was stirred at 80°C for 12 h. The resulting mixture was cooled and filtered over celite® and the solvent was removed under reduced pressure. The crude mixture was purified by flash

chromatography, (heptane:AcOEt 2:1) to afford **20** (60.0 mg, 47%, yellow oil).

**<sup>1</sup>H-NMR (300 MHz, CDCl<sub>3</sub>)**  $\delta$  7.47 – 7.31 (m, 4H), 7.25 – 7.12 (m, 6H), 6.37 (d,  $J$  = 3.2 Hz, 1H), 6.23 (d,  $J$  = 3.2 Hz, 1H), 4.87 (d,  $J$  = 9.0 Hz, 1H), 4.35 (q,  $J$  = 13.2 Hz, 2H), 3.87 (s, 3H), 3.68 (dd,  $J$  = 9.0, 7.7 Hz, 1H), 3.57 – 3.45 (m, 3H), 2.77 (t,  $J$  = 7.3 Hz, 2H), 1.61 (s, 3H).

**<sup>13</sup>C-NMR (75 MHz, CDCl<sub>3</sub>)**  $\delta$  174.8, 173.7, 172.3, 152.5, 149.5, 139.0, 131.8, 129.2(2C), 129.1(2C), 128.8, 128.4(2C), 126.6(2C), 126.3, 110.4, 109.5, 70.8, 68.6, 64.8, 58.2, 56.9, 53.1, 50.3, 36.2, 24.0.

**HRMS (ESI<sup>+</sup>):** Calculated for C<sub>28</sub>H<sub>29</sub>N<sub>2</sub>O<sub>6</sub>, 489.2020; found, 489.2014.

**Typical Procedure 6: (±)-Methyl 3-(5-(*E*)-3-(4-methoxyphenyl)acryloyloxymethylfuran-2-yl)-1-methyl-4,6-dioxo-5-phenyloctahydropyrrolo[3,4-*c*]pyrrole-1-carboxylate (**21**)**

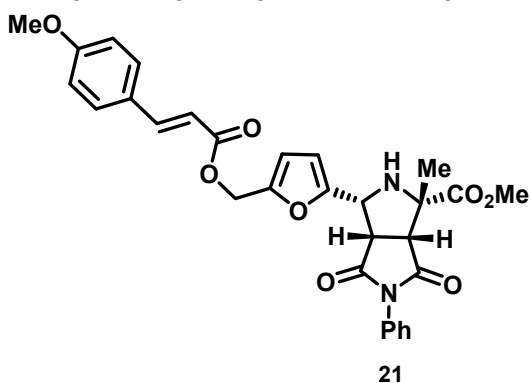

A suspension of *trans*-4-methoxycinnamic acid (46.3 mg, 0.26 mmol), **3a** (100 mg, 0.26 mmol), *N,N'*-dicyclohexylcarbodiimide (60.0, 0.29), 4-(dimethylamino)pyridine (3.2 mg,  $2.6 \cdot 10^{-2}$  mmol) in DCM (3 mL) was stirred at room temperature for 12 h. The resulting mixture was filtered and the solvent was removed under reduced pressure. The crude mixture was purified by flash chromatography, (heptane:AcOEt 3:1) to afford **21** (109.0 mg, 77%, white solid).

**M.p.** 134-136°C

**<sup>1</sup>H-NMR (300 MHz, CDCl<sub>3</sub>)**  $\delta$  7.62 (d,  $J$  = 16.0 Hz, 1H), 7.44 – 7.34 (m, 2H), 7.33 – 7.27 (m, 2H), 7.25 – 7.20 (m, 2H), 7.05 (d,  $J$  = 7.7 Hz, 1H), 6.99 – 6.97 (m, 1H), 6.92 (dd,  $J$  = 7.7, 2.4 Hz, 1H), 6.41 (s, 2H), 6.32 (d,  $J$  = 16.0 Hz, 1H), 5.06 (d,  $J$  = 1.6 Hz, 2H), 4.86 (d,  $J$  = 9.0 Hz, 1H), 3.87 (s, 3H), 3.80 (s, 3H), 3.69 (dd,  $J$  = 9.0, 7.7 Hz, 1H), 3.49 (d,  $J$  = 7.7 Hz, 1H), 1.60 (s, 3H).

**<sup>13</sup>C-NMR (75 MHz, CDCl<sub>3</sub>)** δ 174.7, 173.7, 172.2, 166.4, 159.9, 150.3, 150.0, 145.4, 135.7, 131.8, 129.8, 129.2(2C), 128.8, 126.4(2C), 121.0, 117.8, 116.4, 113.0, 111.8, 109.8, 68.4, 58.0, 58.0, 56.8, 55.3, 53.0, 50.1, 23.9.  
**HRMS (ESI+):** Calculated for C<sub>30</sub>H<sub>29</sub>N<sub>2</sub>O<sub>8</sub>, 545.1918; found, 545.1911.

## 6. Stereochemical assignment of the products

The relative configuration of **3a** was unequivocally established by X-ray crystal structure analysis.

### X-ray structure of **3a**

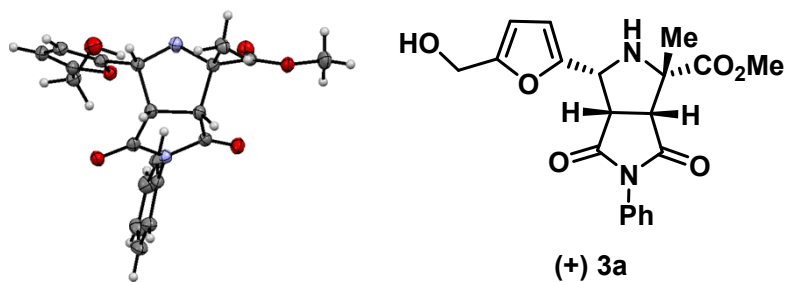

7. HPLC chart

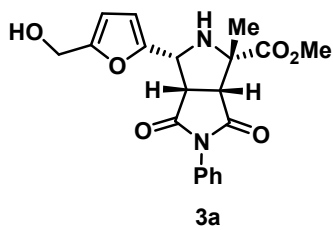

(±)-3a

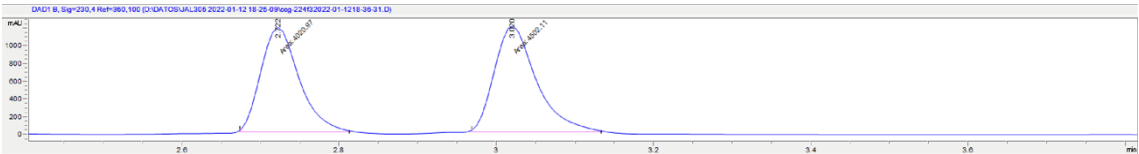

| # | Time  | Type | Area   | Height | Width  | Area%  | Symmetry |
|---|-------|------|--------|--------|--------|--------|----------|
| 1 | 2.722 | MM   | 4021   | 1195.8 | 0.056  | 47.177 | 0.779    |
| 2 | 3.02  | MM   | 4502.1 | 1218.7 | 0.0616 | 52.823 | 0.717    |

(+)-3a; 95% ee

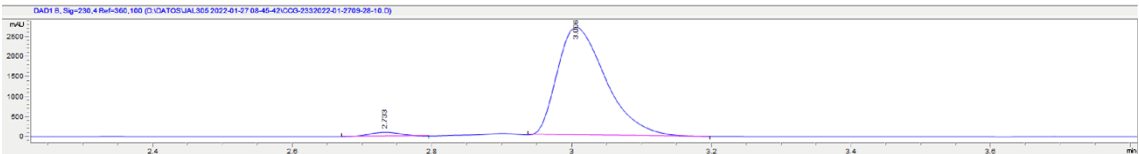

| # | Time  | Type | Area    | Height | Width  | Area%  | Symmetry |
|---|-------|------|---------|--------|--------|--------|----------|
| 1 | 2.733 | BB   | 317.3   | 102    | 0.0503 | 2.374  | 0.963    |
| 2 | 3.006 | BB   | 13046.5 | 2729.7 | 0.0758 | 97.626 | 0.589    |

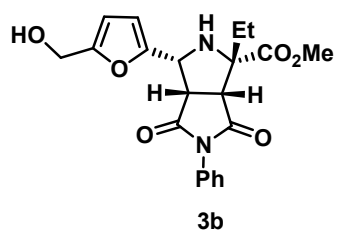

(±)-**3b**

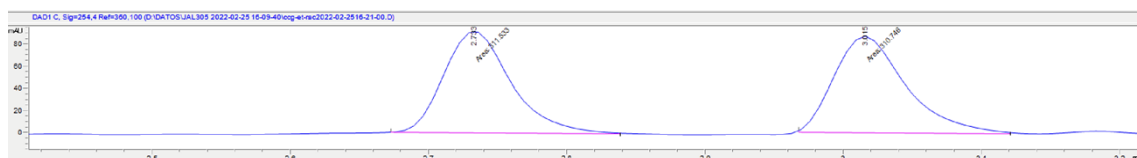

| # | Time  | Type | Area  | Height | Width  | Area%  | Symmetry |
|---|-------|------|-------|--------|--------|--------|----------|
| 1 | 2.733 | MM   | 311.5 | 92     | 0.0565 | 50.063 | 0.79     |
| 2 | 3.015 | MM   | 310.7 | 86.9   | 0.0596 | 49.937 | 0.717    |

(+)-**3b**; 95% *ee*

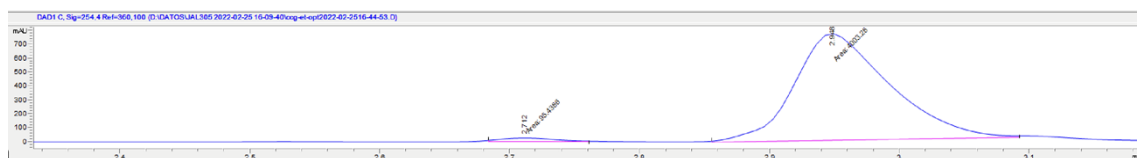

| # | Time  | Type | Area   | Height | Width  | Area%  | Symmetry |
|---|-------|------|--------|--------|--------|--------|----------|
| 1 | 2.712 | MM   | 95.4   | 31.4   | 0.0507 | 2.328  | 0.634    |
| 2 | 2.948 | MM   | 4003.3 | 779.9  | 0.0856 | 97.672 | 0.649    |

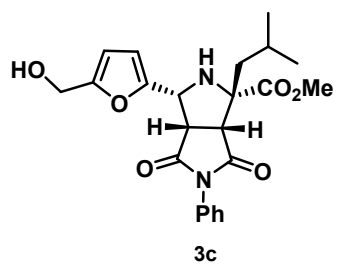

(±)-3c

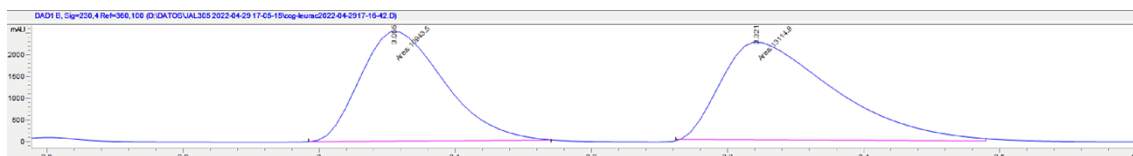

| # | Time  | Type | Area    | Height | Width  | Area%  | Symmetry |
|---|-------|------|---------|--------|--------|--------|----------|
| 1 | 3.055 | MM   | 10943.5 | 2558.4 | 0.0713 | 45.487 | 0.677    |
| 2 | 3.321 | MM   | 13114.9 | 2277   | 0.096  | 54.513 | 0.455    |

(+)-3c; 98% ee

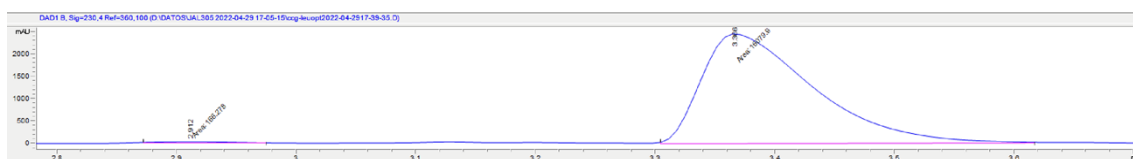

| # | Time  | Type | Area    | Height | Width  | Area%  | Symmetry |
|---|-------|------|---------|--------|--------|--------|----------|
| 1 | 2.912 | MM   | 166.3   | 36     | 0.0769 | 1.023  | 0.708    |
| 2 | 3.366 | MM   | 16079.9 | 2479.4 | 0.1081 | 98.977 | 0.42     |

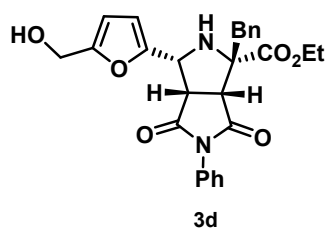

(±)-**3d**

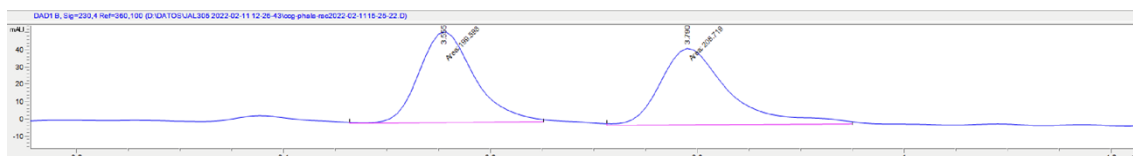

| # | Time  | Type | Area  | Height | Width  | Area%  | Symmetry |
|---|-------|------|-------|--------|--------|--------|----------|
| 1 | 3.555 | MM   | 199.6 | 53.3   | 0.0624 | 48.883 | 0.796    |
| 2 | 3.79  | MM   | 208.7 | 44.8   | 0.0776 | 51.117 | 0.652    |

(+)-**3d**; 98% *ee*

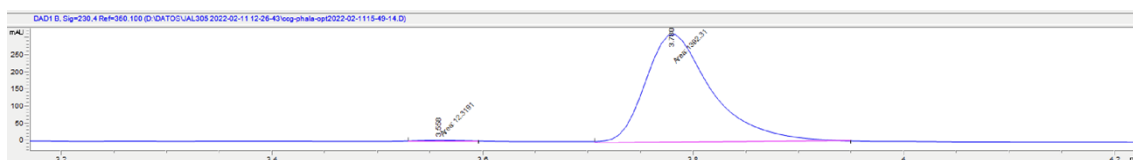

| # | Time  | Type | Area   | Height | Width  | Area%  | Symmetry |
|---|-------|------|--------|--------|--------|--------|----------|
| 1 | 3.558 | MM   | 12.3   | 4.2    | 0.0487 | 0.877  | 0.858    |
| 2 | 3.78  | MM   | 1392.3 | 319    | 0.0728 | 99.123 | 0.668    |

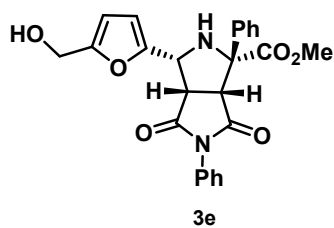

(±)-**3e**

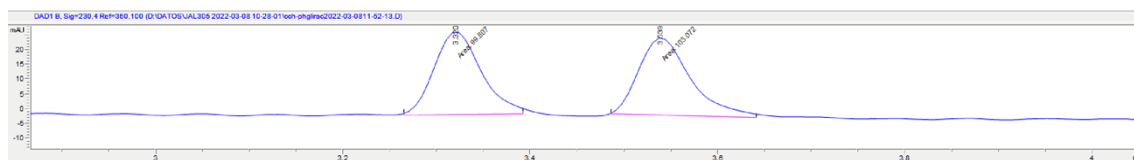

| # | Time  | Type | Area  | Height | Width  | Area%  | Symmetry |
|---|-------|------|-------|--------|--------|--------|----------|
| 1 | 3.32  | MM   | 99.8  | 28.5   | 0.0584 | 49.195 | 0.82     |
| 2 | 3.539 | MM   | 103.1 | 26.6   | 0.0646 | 50.805 | 0.706    |

(-)-**3e**; 98% *ee*

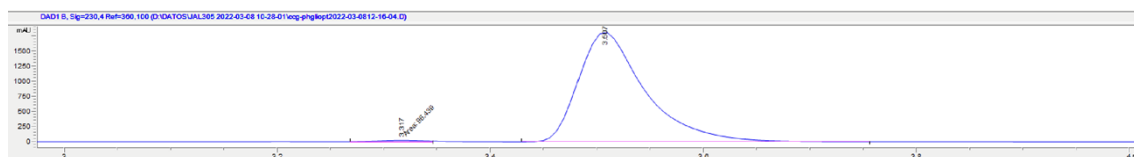

| # | Time  | Type | Area   | Height | Width  | Area%  | Symmetry |
|---|-------|------|--------|--------|--------|--------|----------|
| 1 | 3.317 | MM   | 96.4   | 28.4   | 0.0567 | 1.217  | 1.162    |
| 2 | 3.507 | BB   | 7827.2 | 1820.8 | 0.0642 | 98.783 | 0.599    |

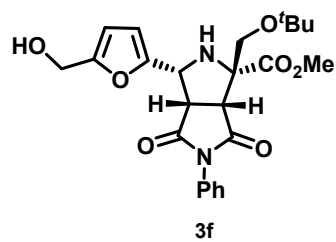

(±)-**3f**

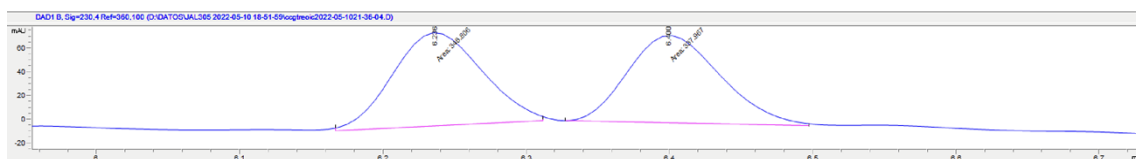

| # | Time  | Type | Area  | Height | Width  | Area%  | Symmetry |
|---|-------|------|-------|--------|--------|--------|----------|
| 1 | 6.236 | MM   | 346.8 | 79.9   | 0.0724 | 50.645 | 0.899    |
| 2 | 6.4   | MM   | 338   | 74.6   | 0.0755 | 49.355 | 0.785    |

(+)-**3f**; 99% *ee*

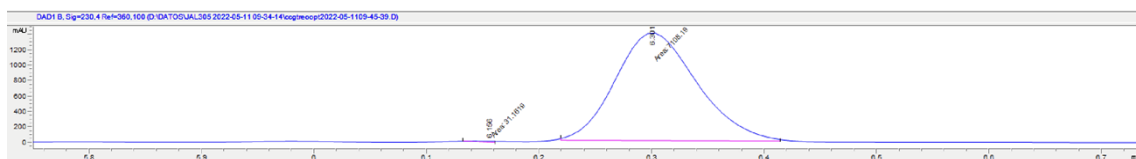

| # | Time  | Type | Area   | Height | Width  | Area%  | Symmetry |
|---|-------|------|--------|--------|--------|--------|----------|
| 1 | 6.156 | MM   | 31.2   | 22.3   | 0.0233 | 0.436  | 0.229    |
| 2 | 6.301 | MM   | 7108.2 | 1412   | 0.0839 | 99.564 | 0.809    |

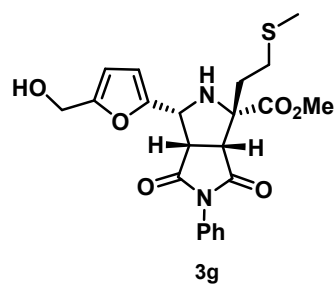

(±)-**3g**

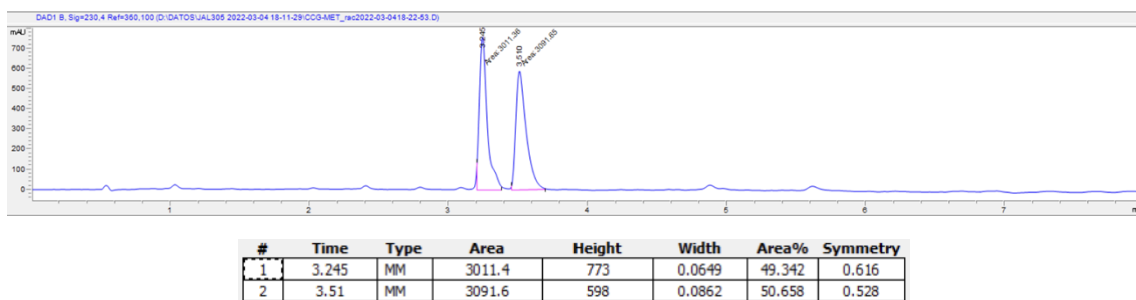

(+)-**3g**; 88% *ee*

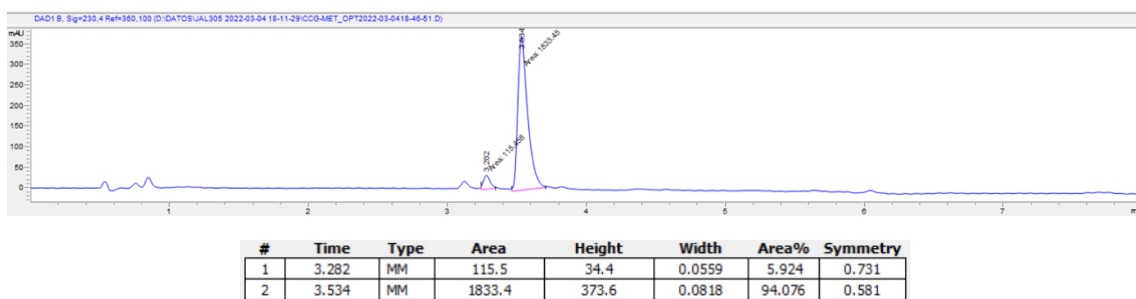

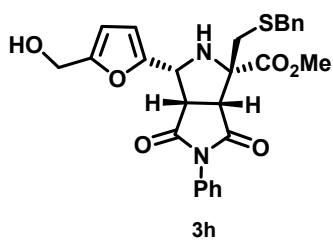

(±)-3h

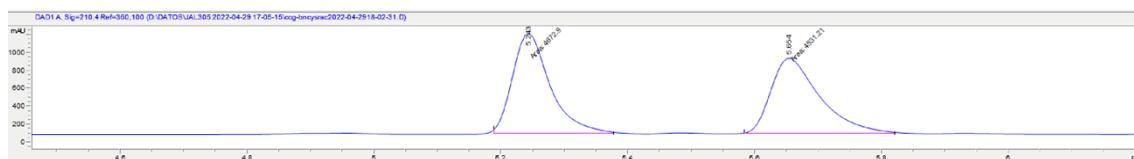

| # | Time  | Type | Area   | Height | Width  | Area%  | Symmetry |
|---|-------|------|--------|--------|--------|--------|----------|
| 1 | 5.243 | MM   | 4672.9 | 1132.1 | 0.0688 | 50.770 | 0.692    |
| 2 | 5.654 | MM   | 4531.2 | 848.7  | 0.089  | 49.230 | 0.572    |

(+)-3h; 86% ee

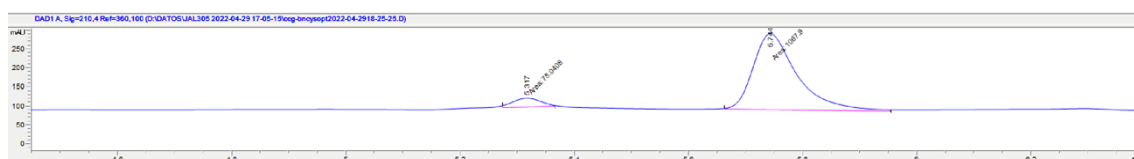

| # | Time  | Type | Area   | Height | Width  | Area%  | Symmetry |
|---|-------|------|--------|--------|--------|--------|----------|
| 1 | 5.317 | MM   | 78     | 23.6   | 0.0551 | 6.810  | 0.976    |
| 2 | 5.744 | MM   | 1067.9 | 200.3  | 0.0889 | 93.190 | 0.622    |

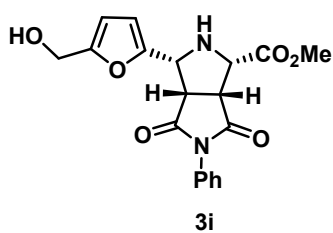

S25

(±)-3i

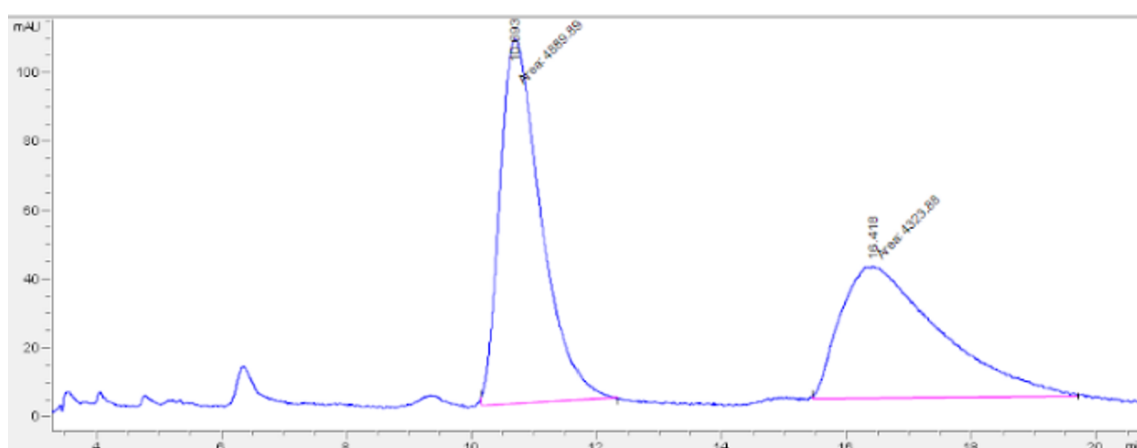

| # | Time   | Area   | Height | Width  | Area%  | Symmetry |
|---|--------|--------|--------|--------|--------|----------|
| 1 | 10.693 | 4889.9 | 106.3  | 0.7667 | 53.072 | 0.555    |
| 2 | 16.418 | 4323.9 | 38.7   | 1.8614 | 46.928 | 0.462    |

(+)-3i; >99% ee

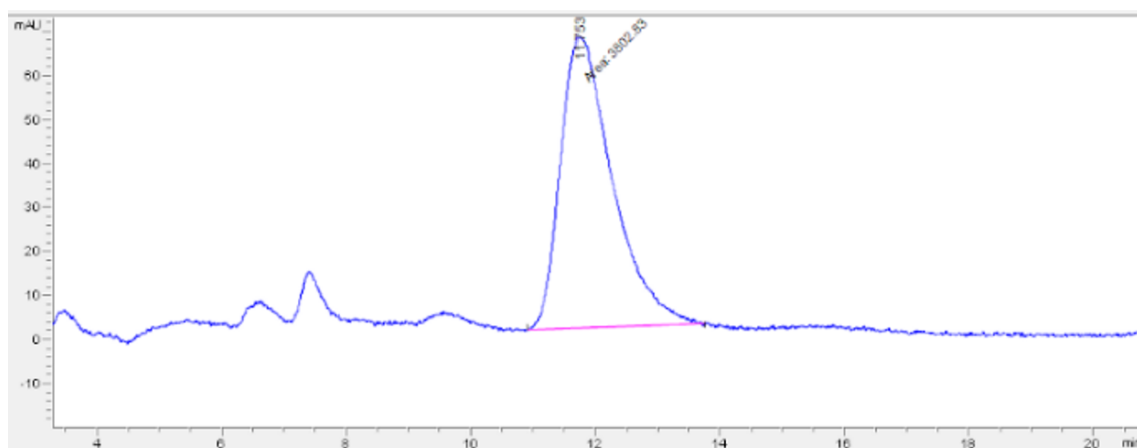

| # | Time   | Area   | Height | Width  | Area%   | Symmetry |
|---|--------|--------|--------|--------|---------|----------|
| 1 | 11.753 | 3802.8 | 66.2   | 0.9569 | 100.000 | 0.592    |

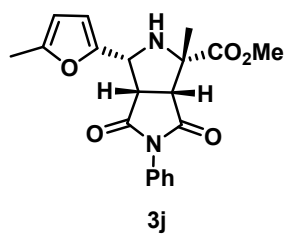

(±)-**3j**

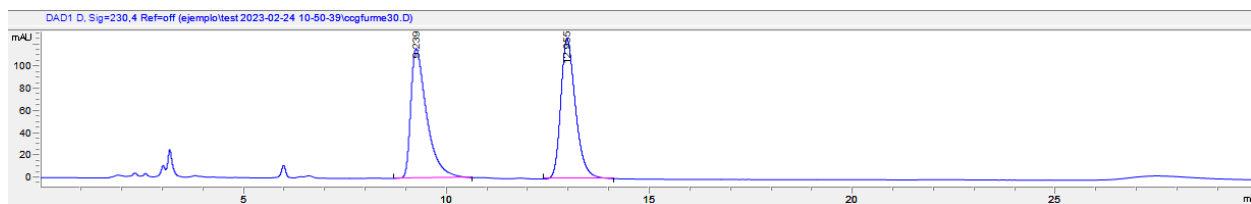

| # | Time   | Area   | Height | Width  | Area%  | Symmetry |
|---|--------|--------|--------|--------|--------|----------|
| 1 | 9.239  | 3184.5 | 116.8  | 0.3662 | 49.932 | 0.468    |
| 2 | 12.955 | 3193.2 | 125.9  | 0.3329 | 50.068 | 0.688    |

(+)-**3j**

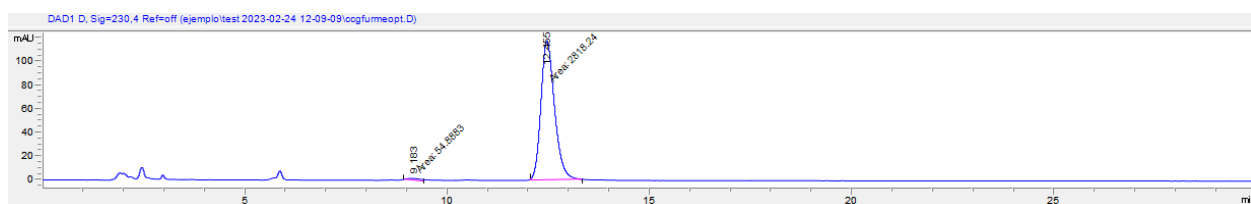

| # | Time   | Area   | Height | Width  | Area%  | Symmetry |
|---|--------|--------|--------|--------|--------|----------|
| 1 | 9.183  | 54.9   | 2.2    | 0.4185 | 1.910  | 0.862    |
| 2 | 12.455 | 2818.2 | 118.9  | 0.395  | 98.090 | 0.763    |

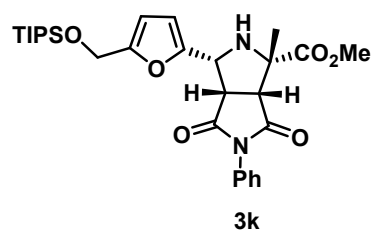

(±)-3k

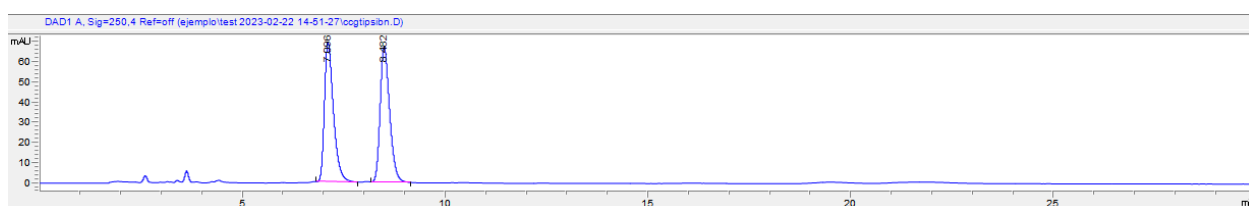

| # | Time  | Area   | Height | Width  | Area%  | Symmetry |
|---|-------|--------|--------|--------|--------|----------|
| 1 | 7.096 | 1068.9 | 68.8   | 0.2277 | 49.681 | 0.597    |
| 2 | 8.482 | 1082.7 | 66.9   | 0.2319 | 50.319 | 0.699    |

(+)-3k

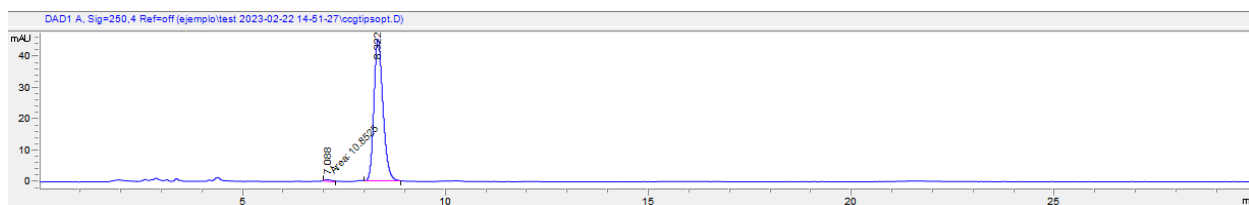

| # | Time  | Area  | Height | Width  | Area%  | Symmetry |
|---|-------|-------|--------|--------|--------|----------|
| 1 | 7.088 | 10.9  | 7.9E-1 | 0.2287 | 1.545  | 0.464    |
| 2 | 8.322 | 691.6 | 44.9   | 0.2225 | 98.455 | 0.752    |

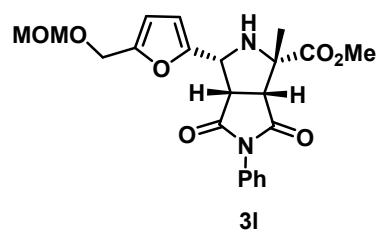

(±)-3I

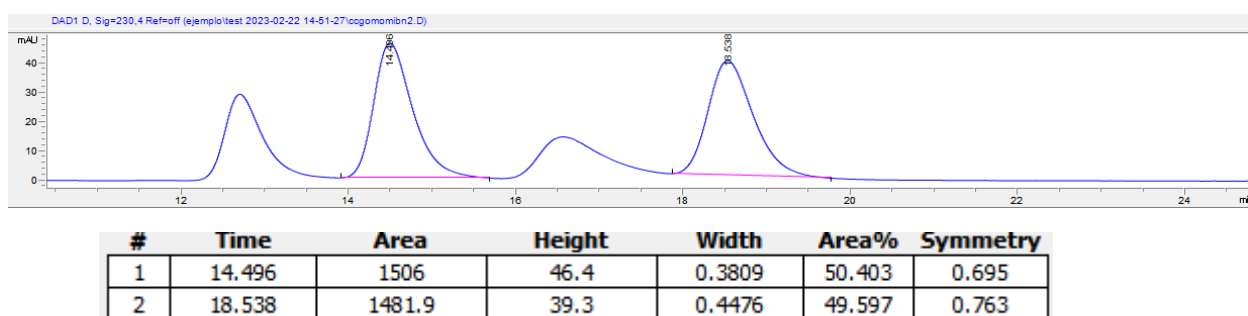

(+)-3I

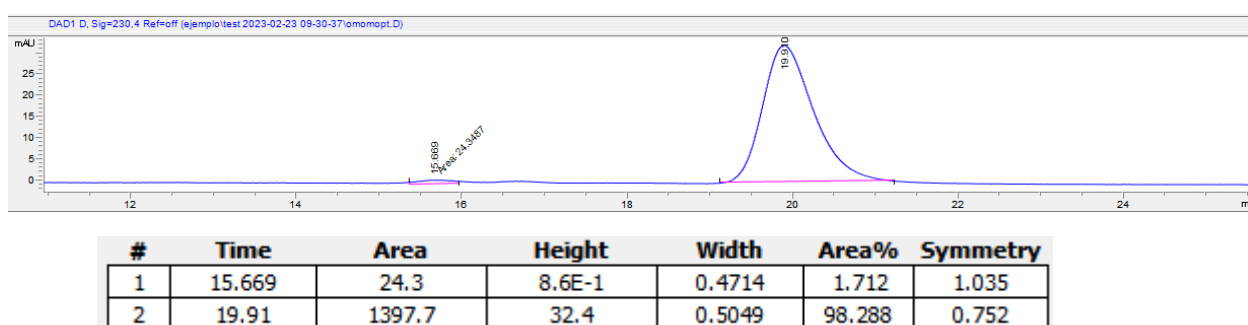

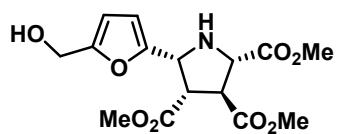

9

(±)-9

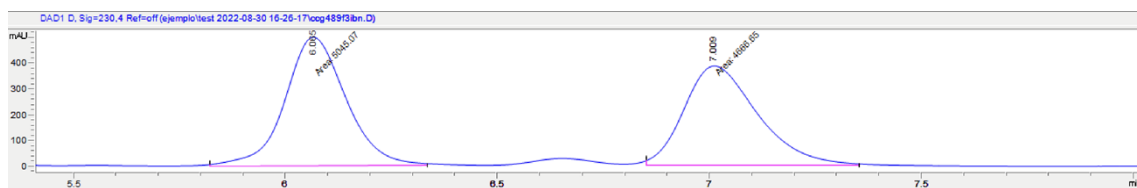

| # | Time  | Area   | Height | Width  | Area%  | Symmetry |
|---|-------|--------|--------|--------|--------|----------|
| 1 | 6.065 | 5045.1 | 500.8  | 0.1679 | 51.948 | 0.87     |
| 2 | 7.009 | 4666.6 | 385.8  | 0.2016 | 48.052 | 0.689    |

(+)-9; 93% ee

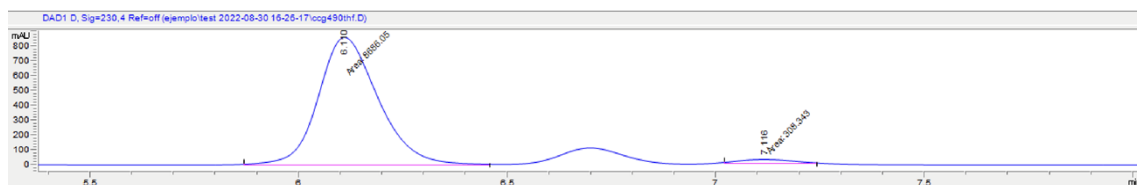

| # | Time  | Area  | Height | Width  | Area%  | Symmetry |
|---|-------|-------|--------|--------|--------|----------|
| 1 | 6.11  | 8686  | 862.6  | 0.1678 | 96.572 | 0.762    |
| 2 | 7.116 | 308.3 | 31.8   | 0.1614 | 3.428  | 0.826    |

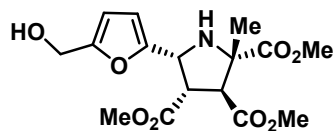

10

(±)-10

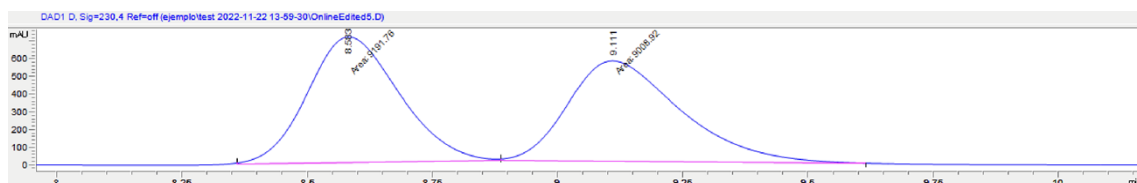

| # | Time  | Area   | Height | Width  | Area%  | Symmetry |
|---|-------|--------|--------|--------|--------|----------|
| 1 | 8.583 | 9191.8 | 718    | 0.2134 | 50.502 | 0.803    |
| 2 | 9.111 | 9008.9 | 573.7  | 0.2617 | 49.498 | 0.632    |

(+)-10; 79% ee

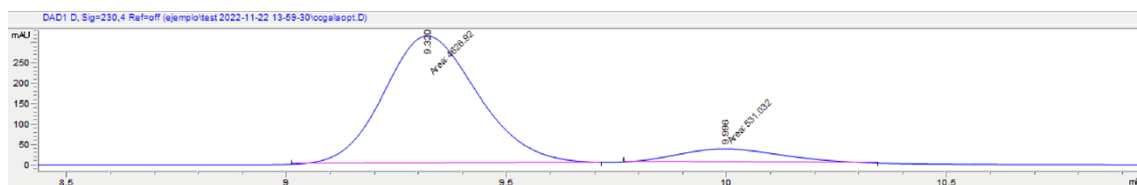

| # | Time  | Area   | Height | Width  | Area%  | Symmetry |
|---|-------|--------|--------|--------|--------|----------|
| 1 | 9.32  | 4626.9 | 311.1  | 0.2479 | 89.705 | 0.832    |
| 2 | 9.996 | 531    | 33     | 0.2685 | 10.295 | 0.8      |

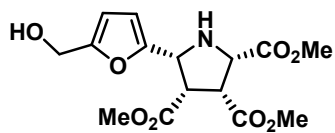

11

S31

(±)-11

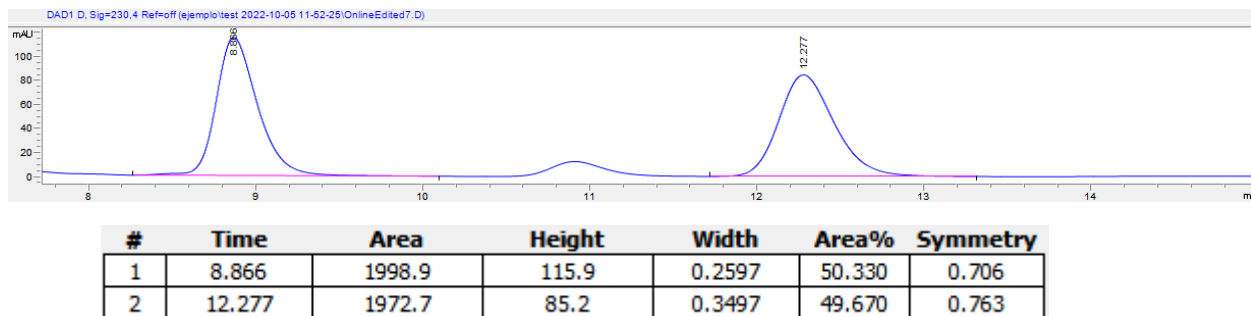

(+)-11; 83% ee

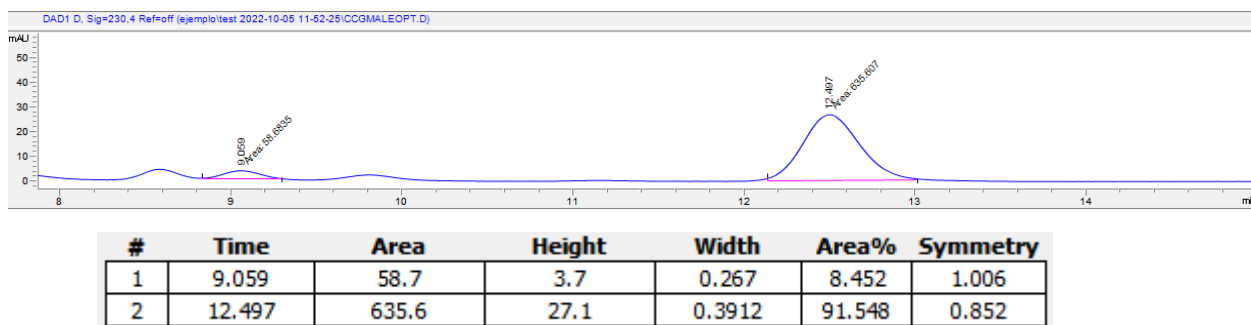

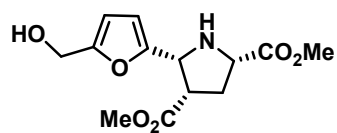

12

(±)-12

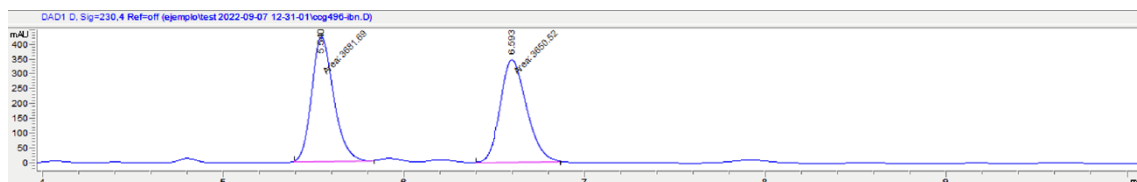

| # | Time  | Area   | Height | Width  | Area%  | Symmetry |
|---|-------|--------|--------|--------|--------|----------|
| 1 | 5.54  | 3681.7 | 427.6  | 0.1435 | 50.213 | 0.769    |
| 2 | 6.593 | 3650.5 | 352.3  | 0.1727 | 49.787 | 0.773    |

(+)-12; 88 % ee

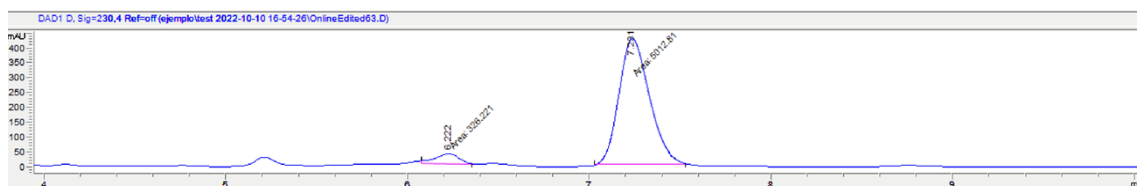

| # | Time  | Area   | Height | Width  | Area%  | Symmetry |
|---|-------|--------|--------|--------|--------|----------|
| 1 | 6.222 | 326.2  | 34.4   | 0.1579 | 6.110  | 1.077    |
| 2 | 7.231 | 5012.8 | 428.7  | 0.1949 | 93.890 | 0.746    |

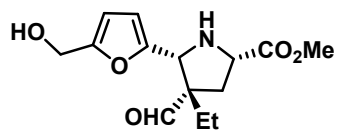

13

(±)-13

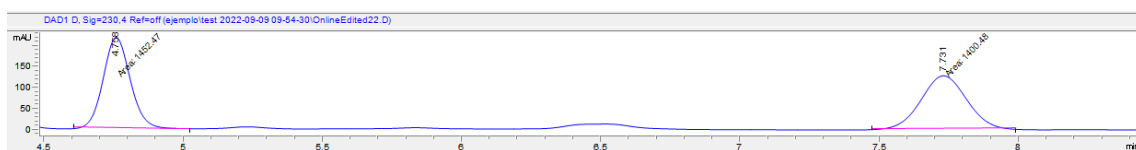

| # | Time  | Area   | Height | Width  | Area%  | Symmetry |
|---|-------|--------|--------|--------|--------|----------|
| 1 | 4.758 | 1452.5 | 215.5  | 0.1123 | 50.911 | 0.88     |
| 2 | 7.731 | 1400.5 | 125.4  | 0.1861 | 49.089 | 0.98     |

(+)-13; 91% ee

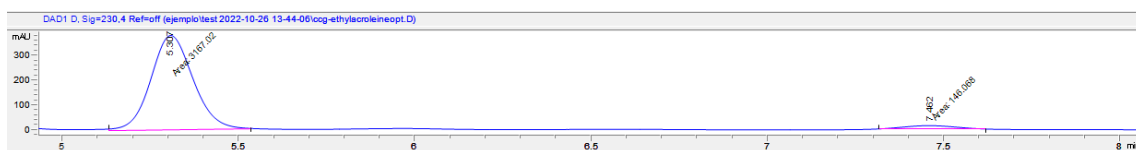

| # | Time  | Area  | Height | Width  | Area%  | Symmetry |
|---|-------|-------|--------|--------|--------|----------|
| 1 | 5.307 | 3167  | 377.4  | 0.1399 | 95.591 | 0.86     |
| 2 | 7.462 | 146.1 | 14     | 0.1741 | 4.409  | 0.744    |

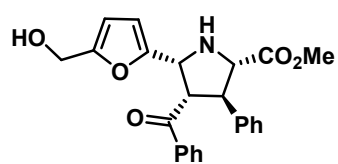

14

(±)-14

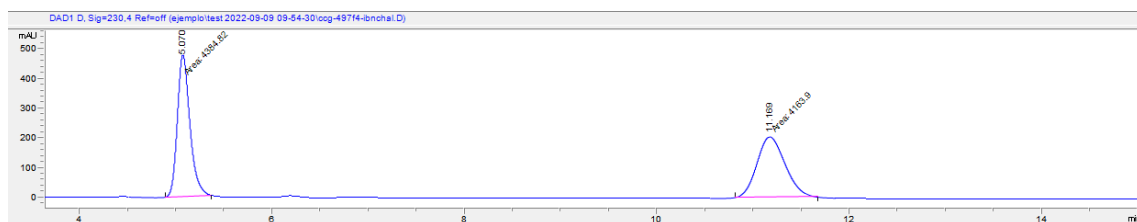

| # | Time   | Area   | Height | Width  | Area%  | Symmetry |
|---|--------|--------|--------|--------|--------|----------|
| 1 | 5.07   | 4384.8 | 478.6  | 0.1527 | 51.292 | 0.749    |
| 2 | 11.169 | 4163.9 | 203.7  | 0.3406 | 48.708 | 0.828    |

(-)-14; 80% ee

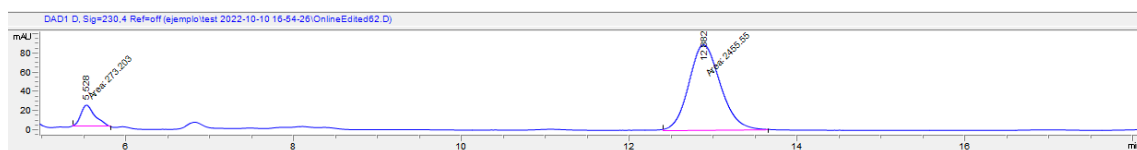

| # | Time   | Area   | Height | Width  | Area%  | Symmetry |
|---|--------|--------|--------|--------|--------|----------|
| 1 | 5.528  | 273.2  | 22.7   | 0.201  | 10.012 | 0.62     |
| 2 | 12.882 | 2455.6 | 91.6   | 0.4469 | 89.988 | 0.834    |

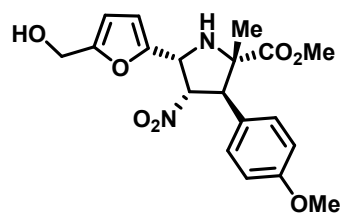

15

(±)-15

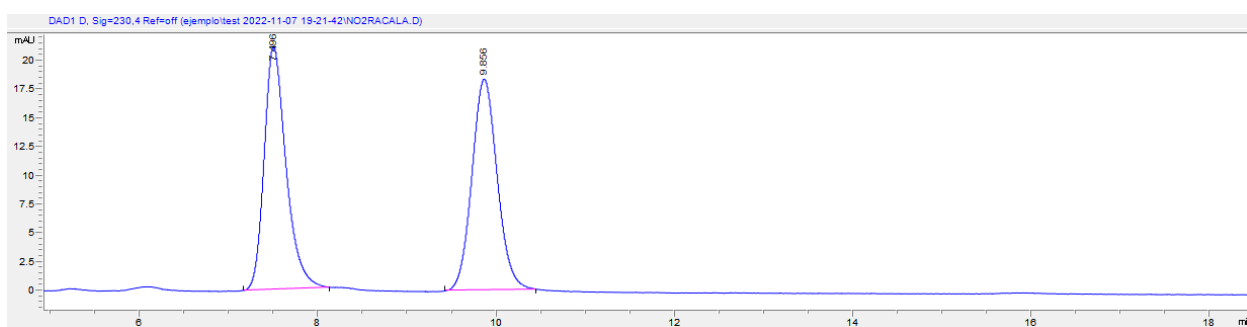

| # | Time  | Area  | Height | Width  | Area%  | Symmetry |
|---|-------|-------|--------|--------|--------|----------|
| 1 | 7.496 | 359.9 | 21.1   | 0.2062 | 49.907 | 0.72     |
| 2 | 9.856 | 361.2 | 18.3   | 0.2316 | 50.093 | 0.904    |

(-)-15; 95% ee

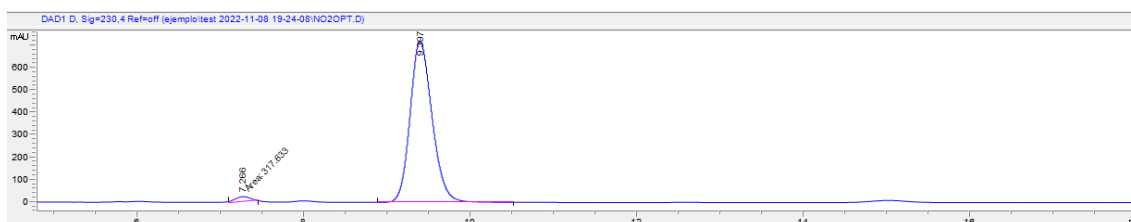

| # | Time  | Area    | Height | Width  | Area%  | Symmetry |
|---|-------|---------|--------|--------|--------|----------|
| 1 | 7.266 | 317.6   | 24.3   | 0.2176 | 2.335  | 1.245    |
| 2 | 9.397 | 13285.7 | 725.1  | 0.2773 | 97.665 | 0.786    |

## 8. NMR Spectra collection

### Methyl (S)-2-(5-(hydroxymethyl)furan-2-yl)methyleneaminopropanoate (1a)

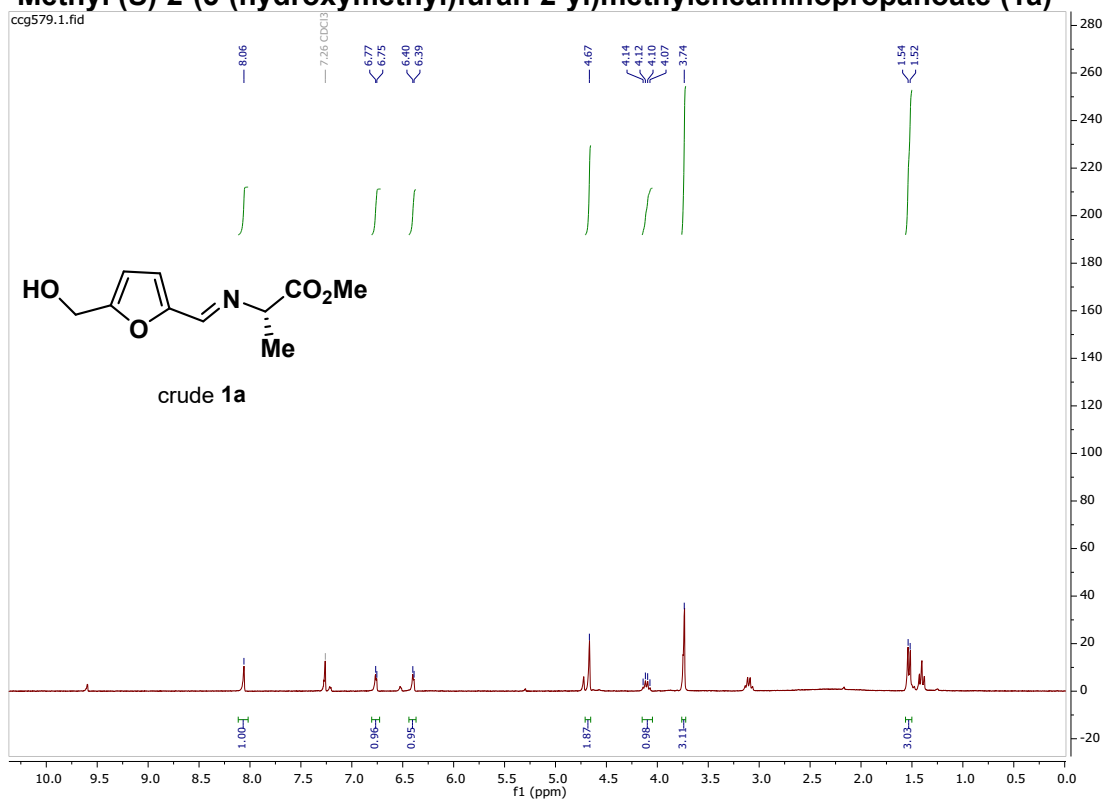

### Methyl (S)-2-(5-(hydroxymethyl)furan-2-yl)methyleneaminobutanoate (1b)

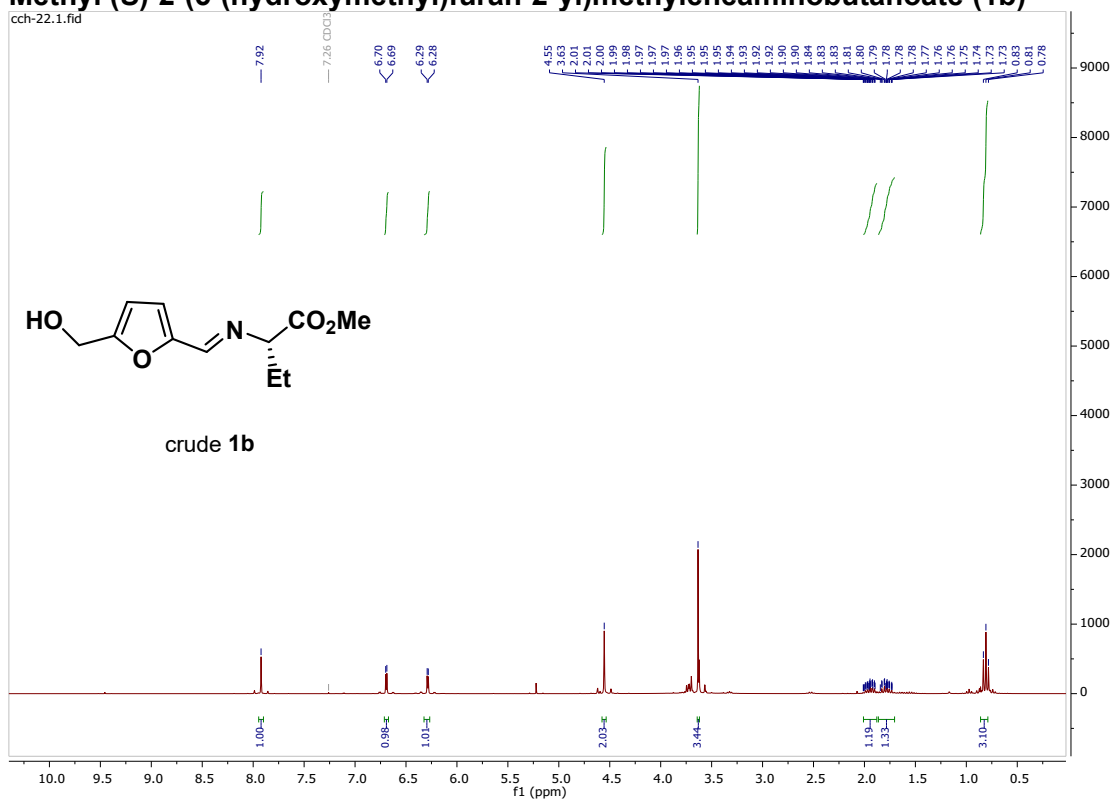

**Methyl (S)-2-(5-(hydroxymethyl)furan-2-yl)methyleneamino)-4-methylpentanoate (1c)**

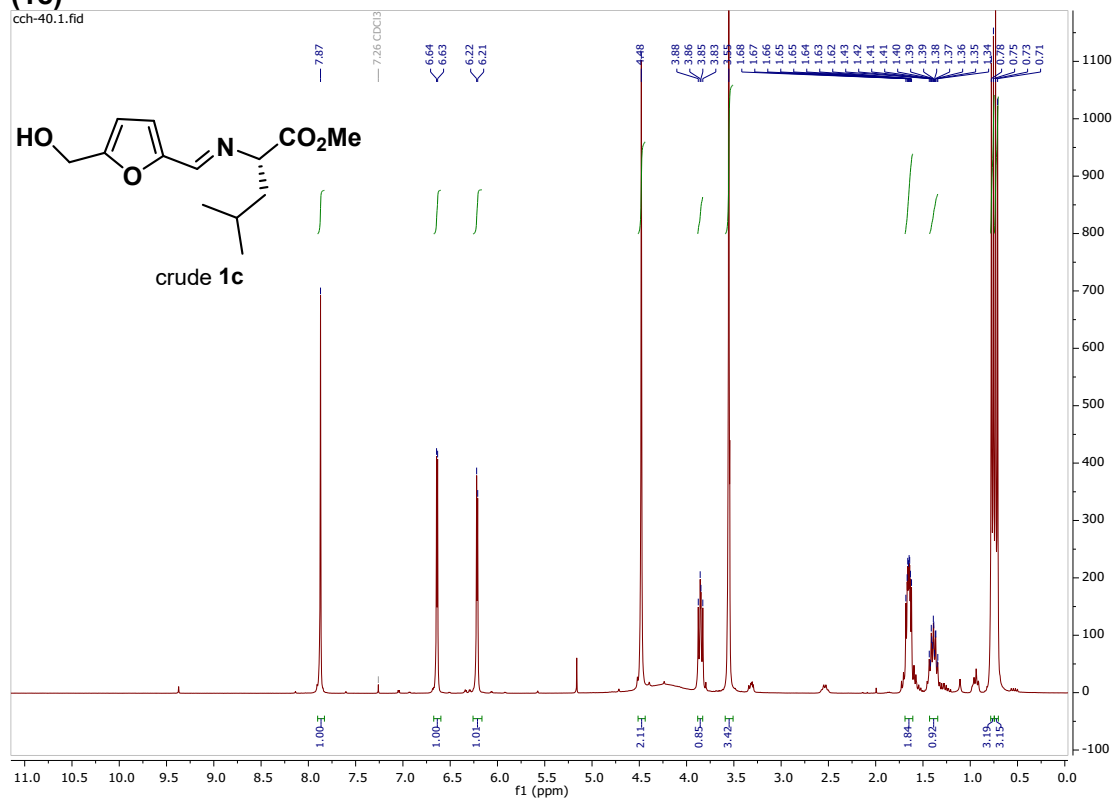

**Ethyl (S)-2-(5-(hydroxymethyl)furan-2-yl)methyleneamino-3-phenylpropanoate (1d)**

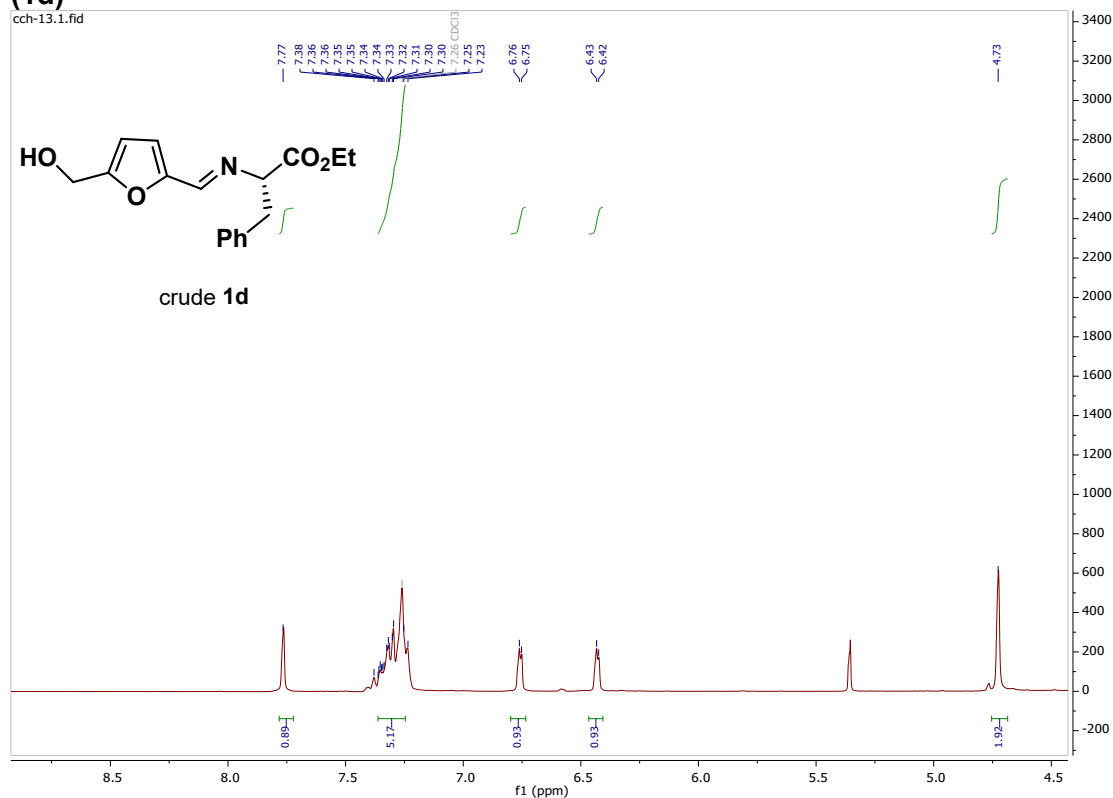

**Methyl (S)-2-(5-(hydroxymethyl)furan-2-yl)methyleneamino-2-phenylacetate (1e)**

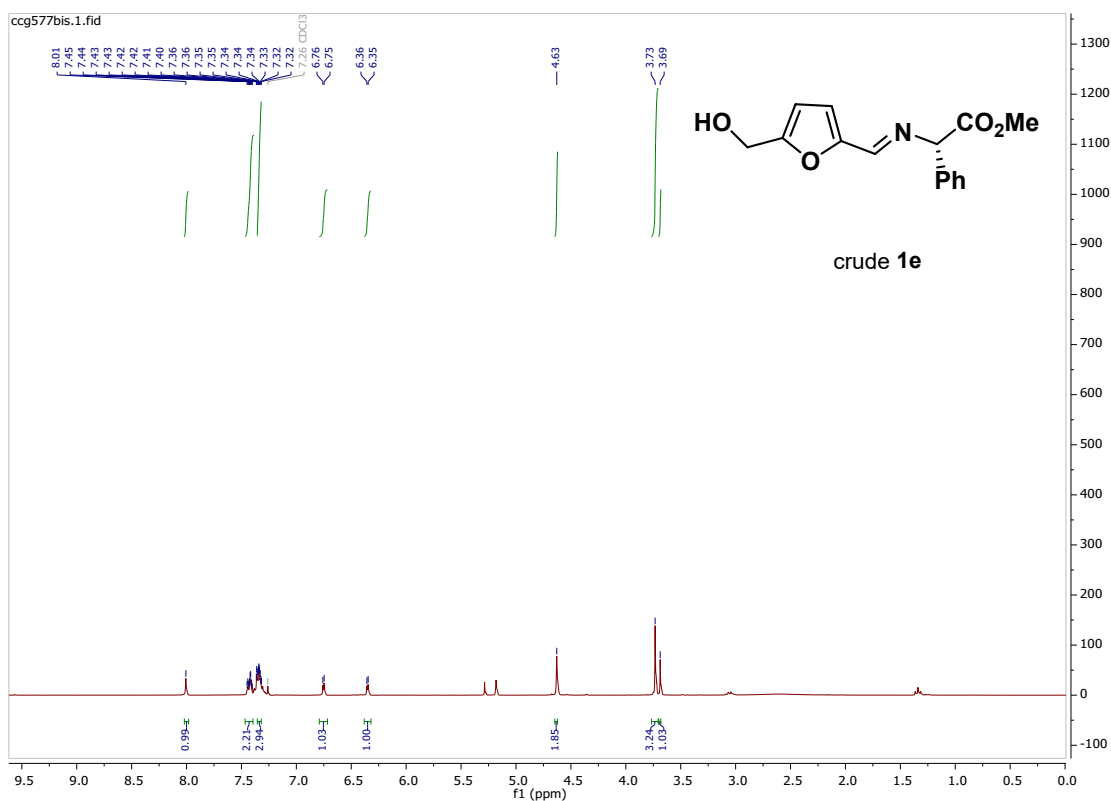

**Methyl (S)-3-(tert-butoxy)-2-(5-(hydroxymethyl)furan-2-yl)methyleneaminopropanoate (1f)**

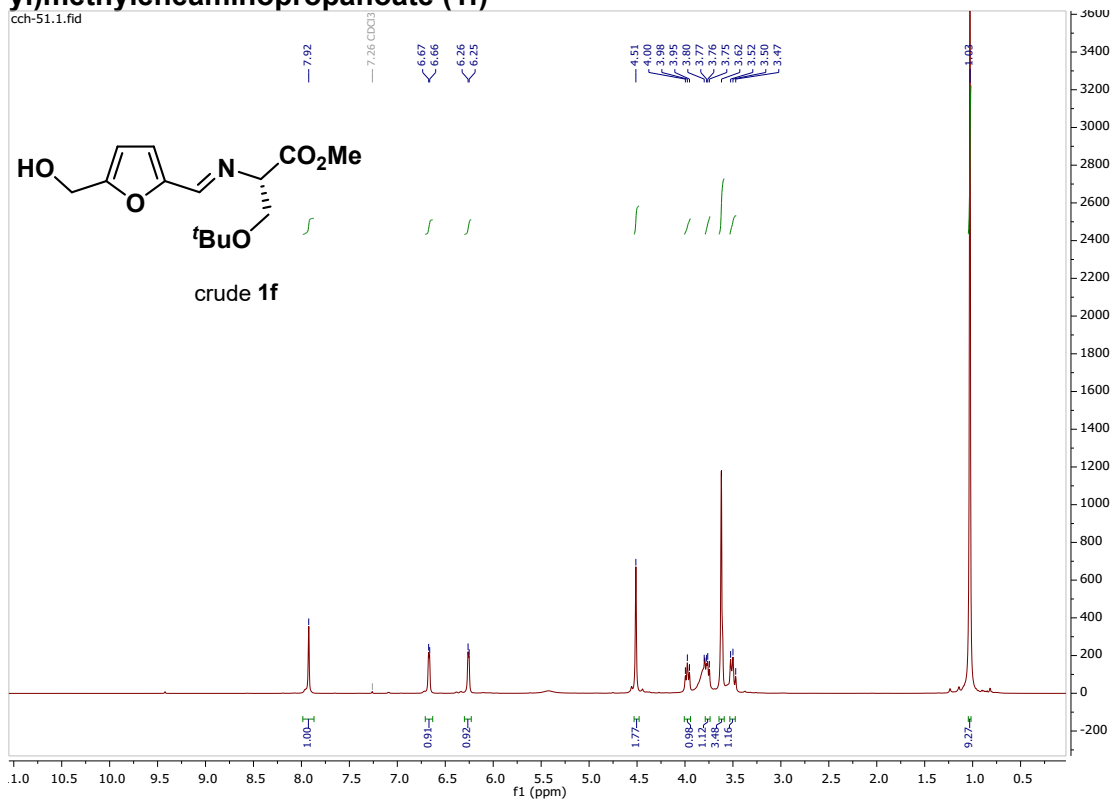

**Methyl (methylthio)butanoate (1g)** **(S)-2-(5-(hydroxymethyl)furan-2-yl)methyleneamino-4-**

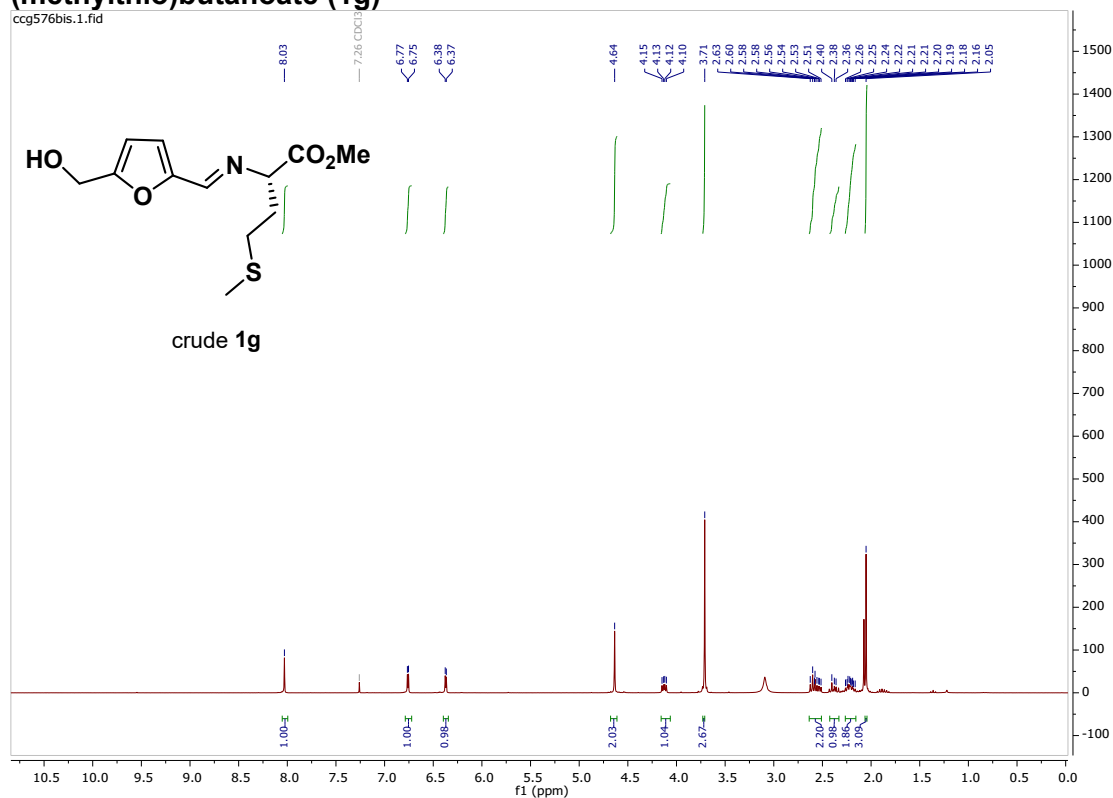

**Methyl (R)-3-(benzylthio)-2-(5-(hydroxymethyl)furan-2-yl)methyleneaminopropanoate (1h)**

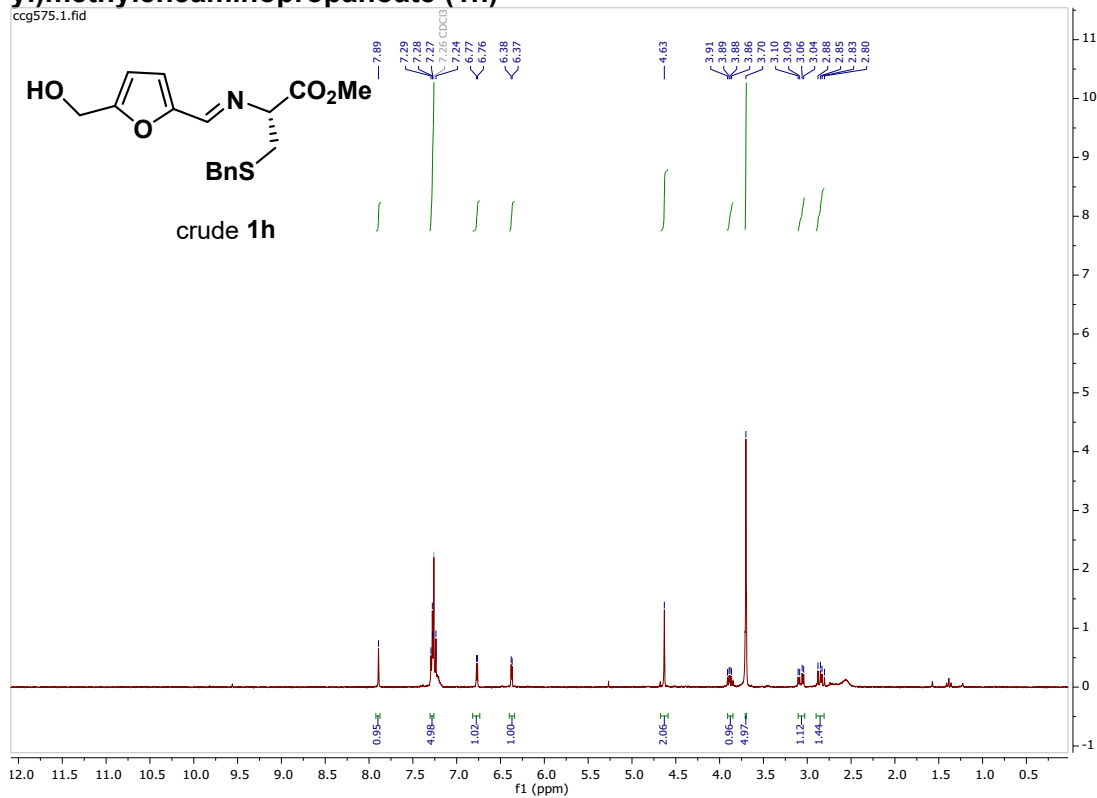

# Methyl 2-(5-(hydroxymethyl)furan-2-yl)methyleneaminoacetate (1i)

cch-25.1.fid

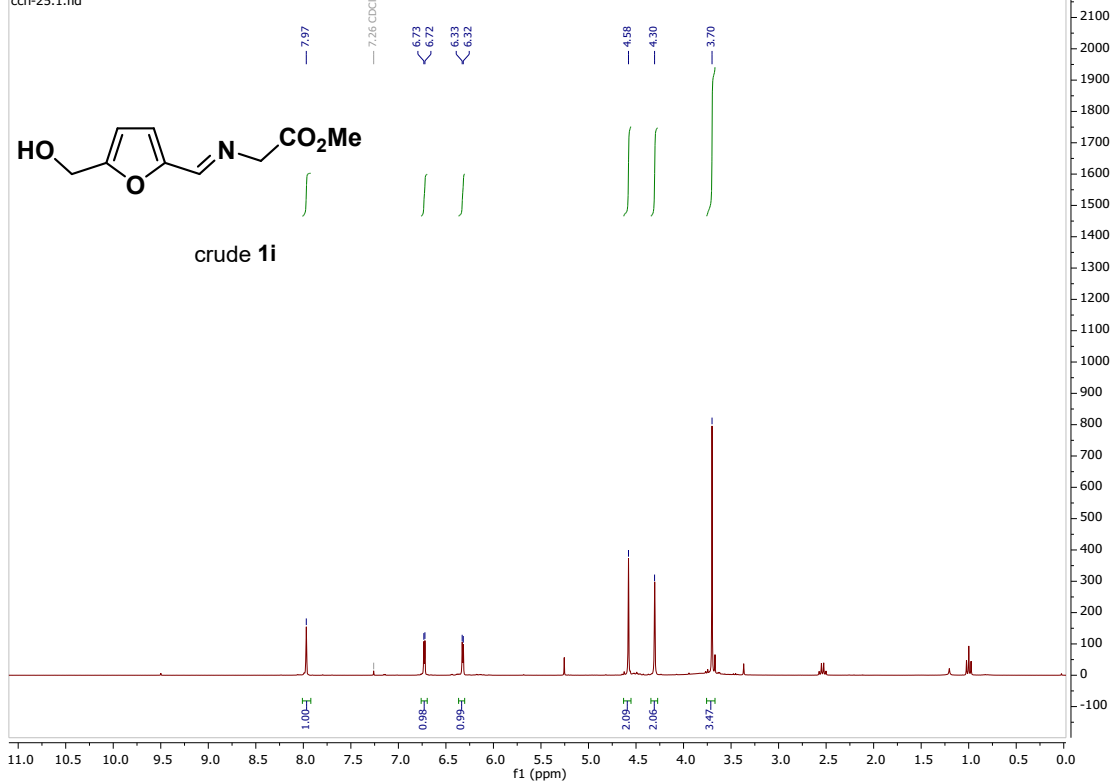

# Methyl (S)-2-((5-methylfuran-2-yl)methyleneamino)propanoate (1j)

cch70iminametilo.1.fid

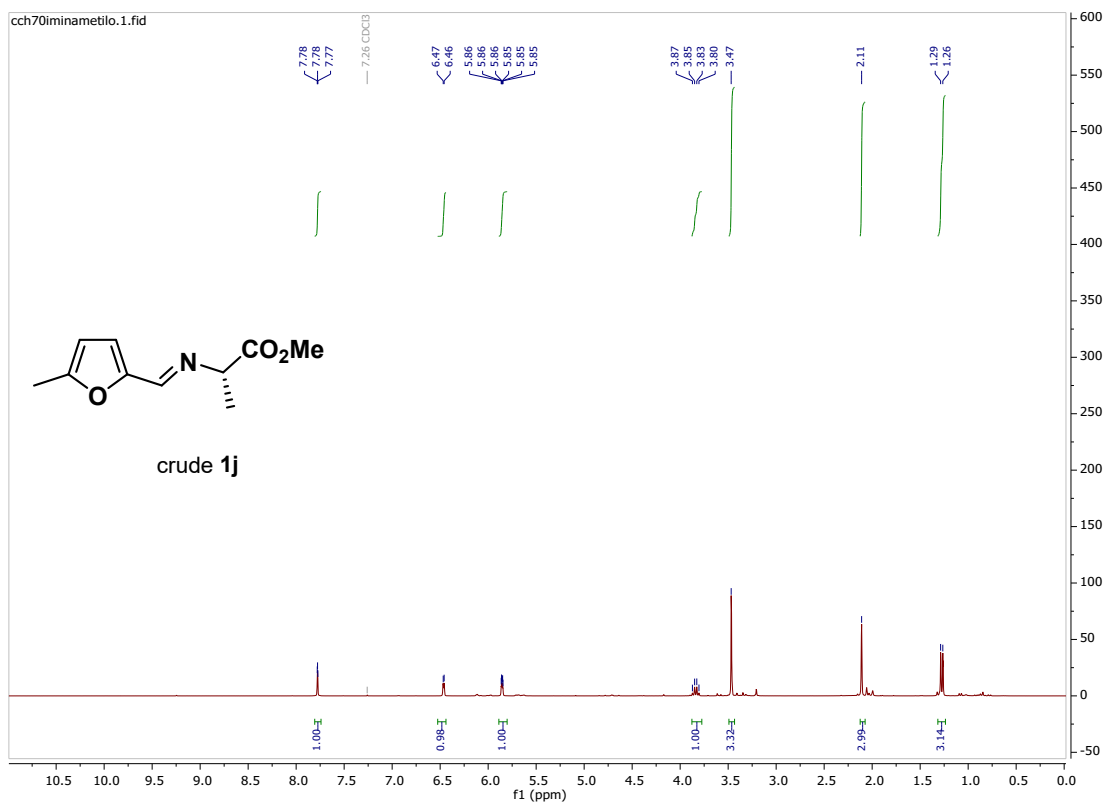

**Methyl (S)-2-((5-(triisopropylsilyloxymethyl)furan-2-yl)methyleneamino)propanoate (1k)**

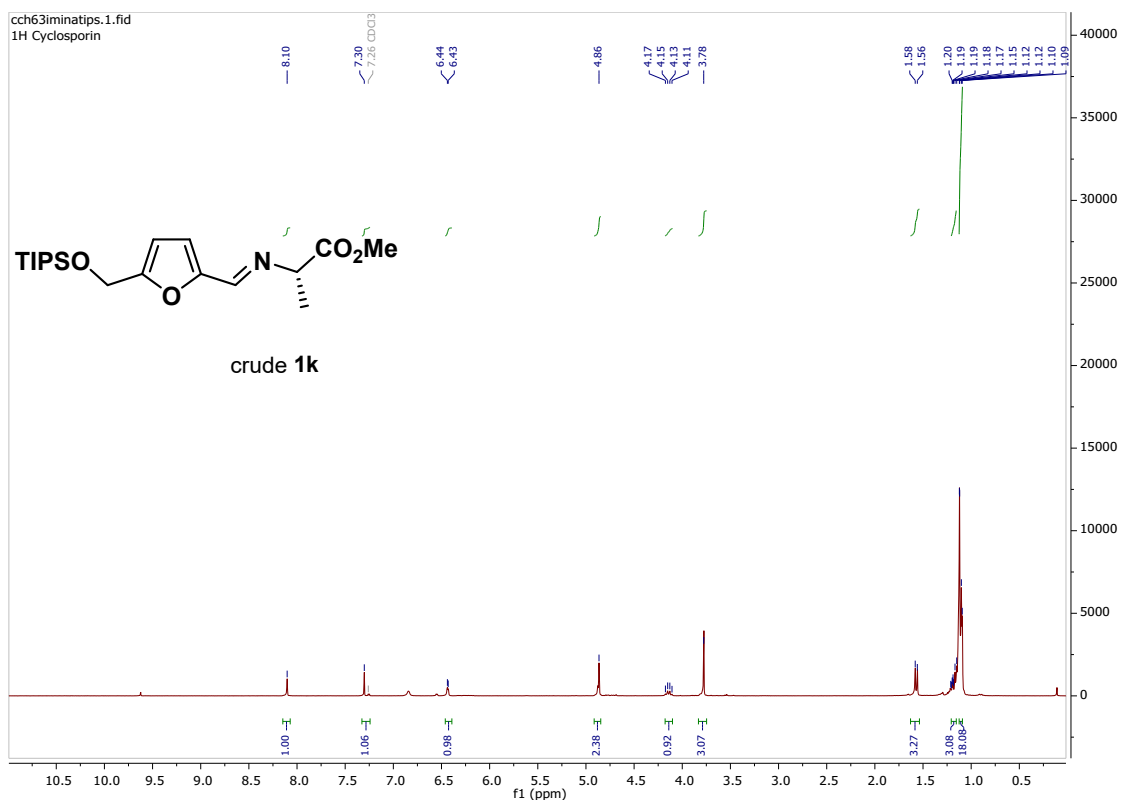

**Methyl (S)-2-(5-((methoxymethoxymethyl)furan-2-yl)methyleneamino)propanoate (1l)**

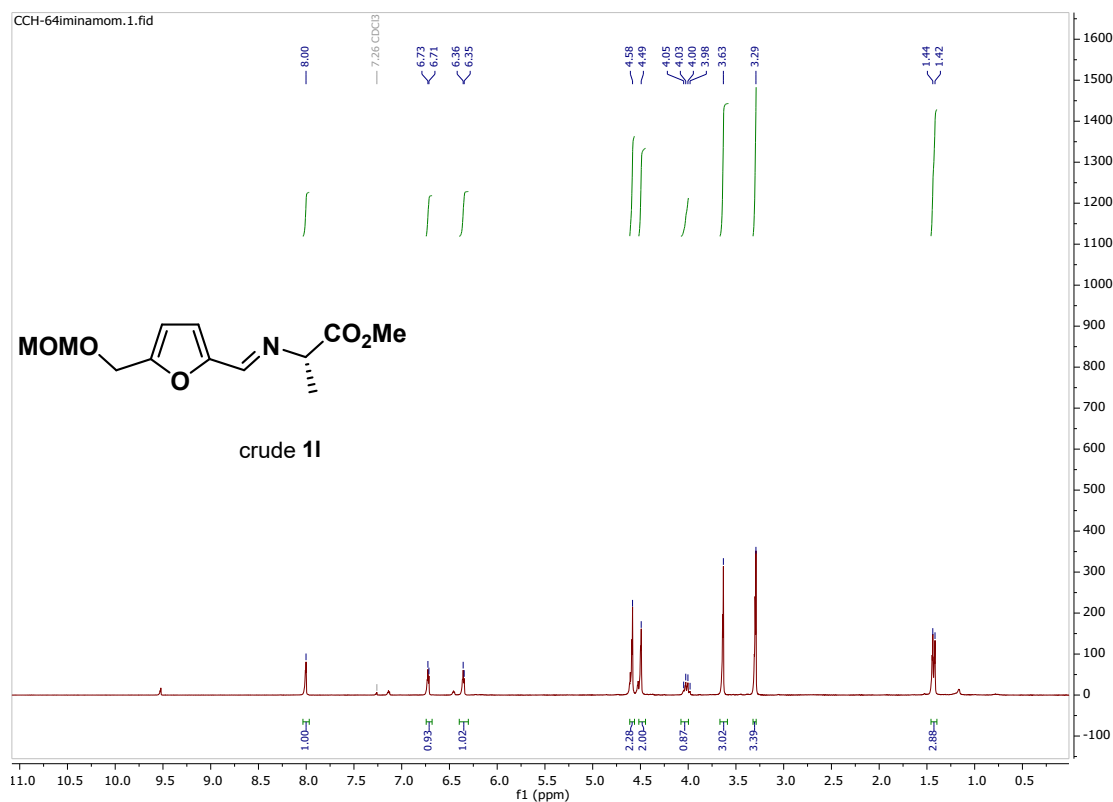

**Methyl (1*S*,3*R*,3*aS*,6*aR*)-3-(5-(hydroxymethyl)furan-2-yl)-1-methyl-4,6-dioxo-5-phenyloctahydropyrrolo[3,4-*c*]pyrrole-1-carboxylate (3a)**

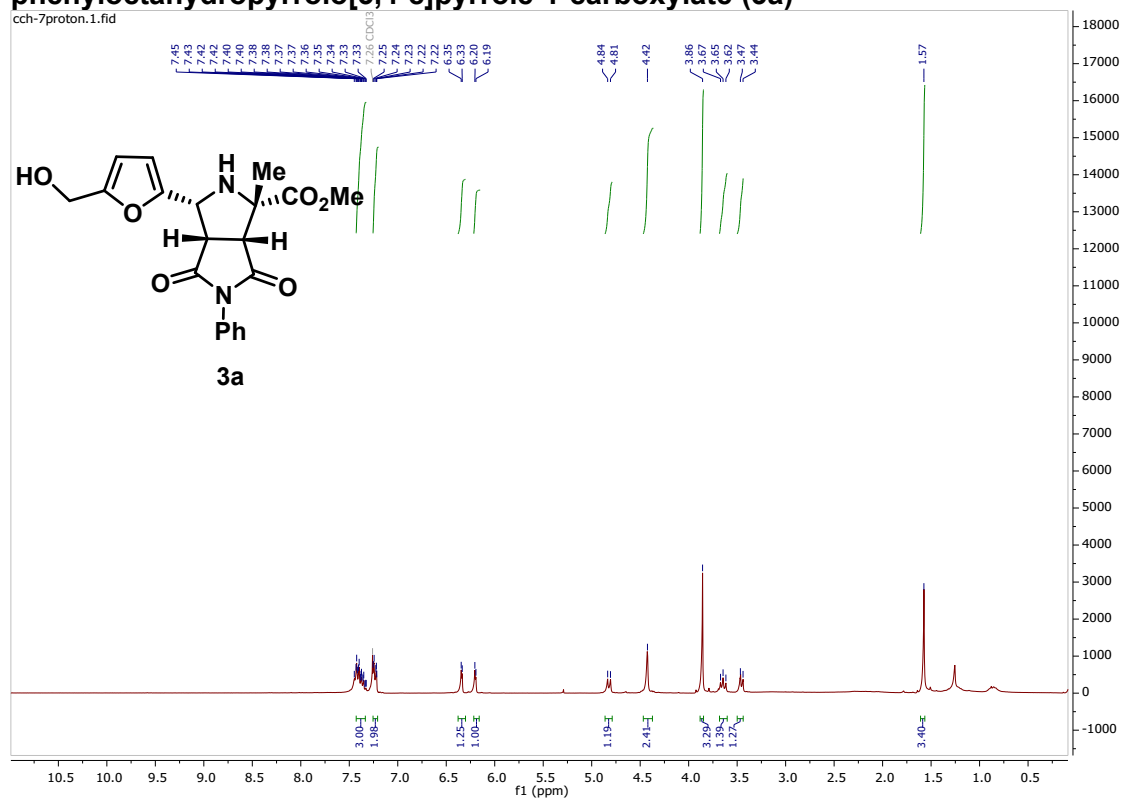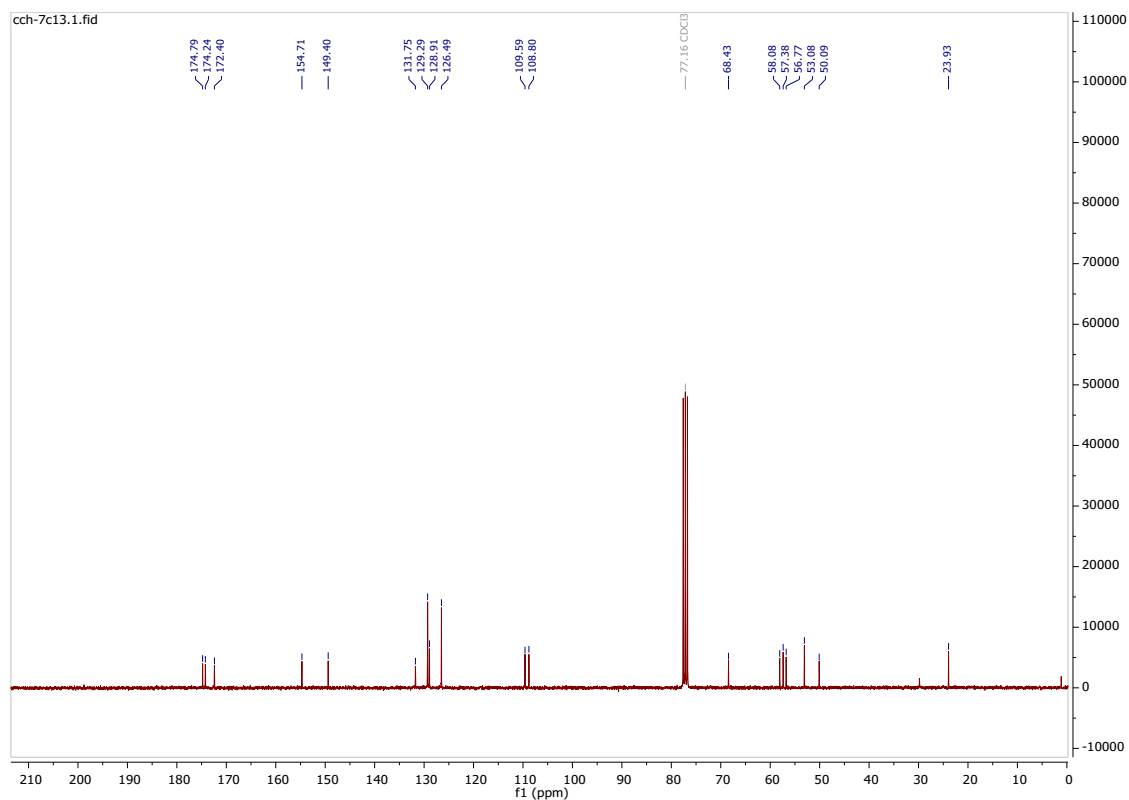

**Methyl (1*S*,3*R*,3*aS*,6*aR*)-1-ethyl-3-(5-(hydroxymethyl)furan-2-yl)-4,6-dioxo-5-phenyloctahydropyrrolo[3,4-*c*]pyrrole-1-carboxylate (3b)**

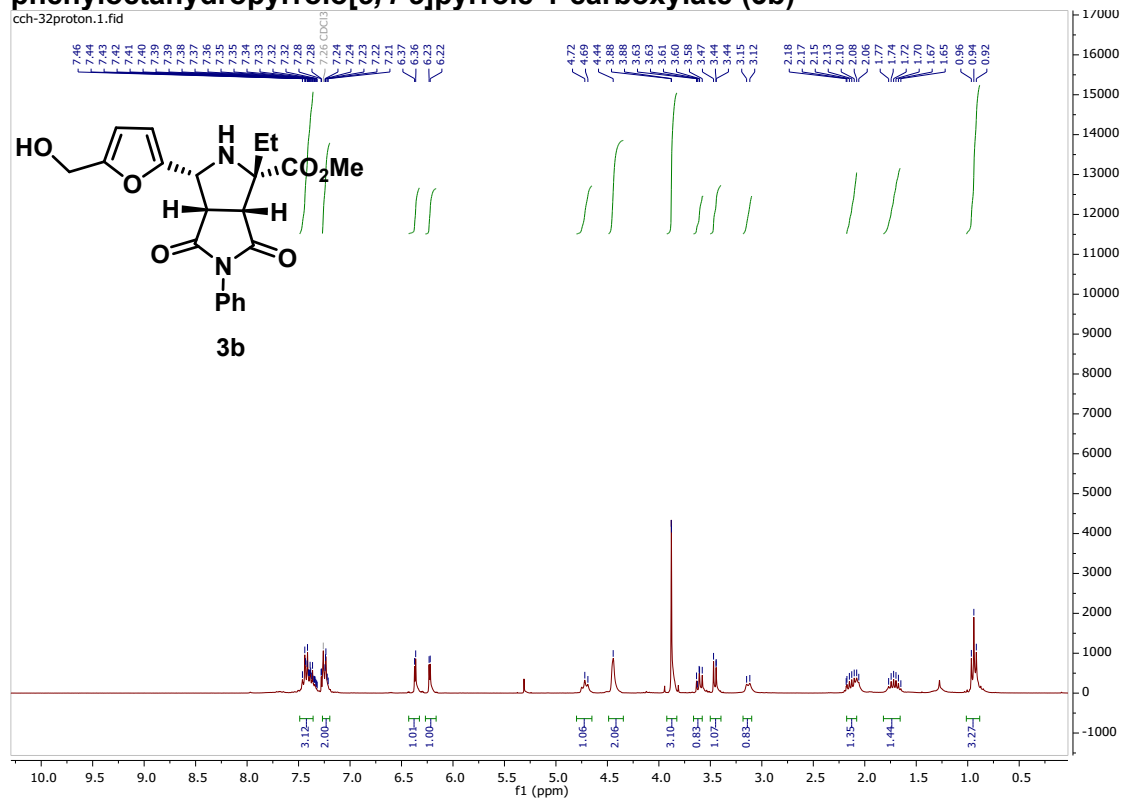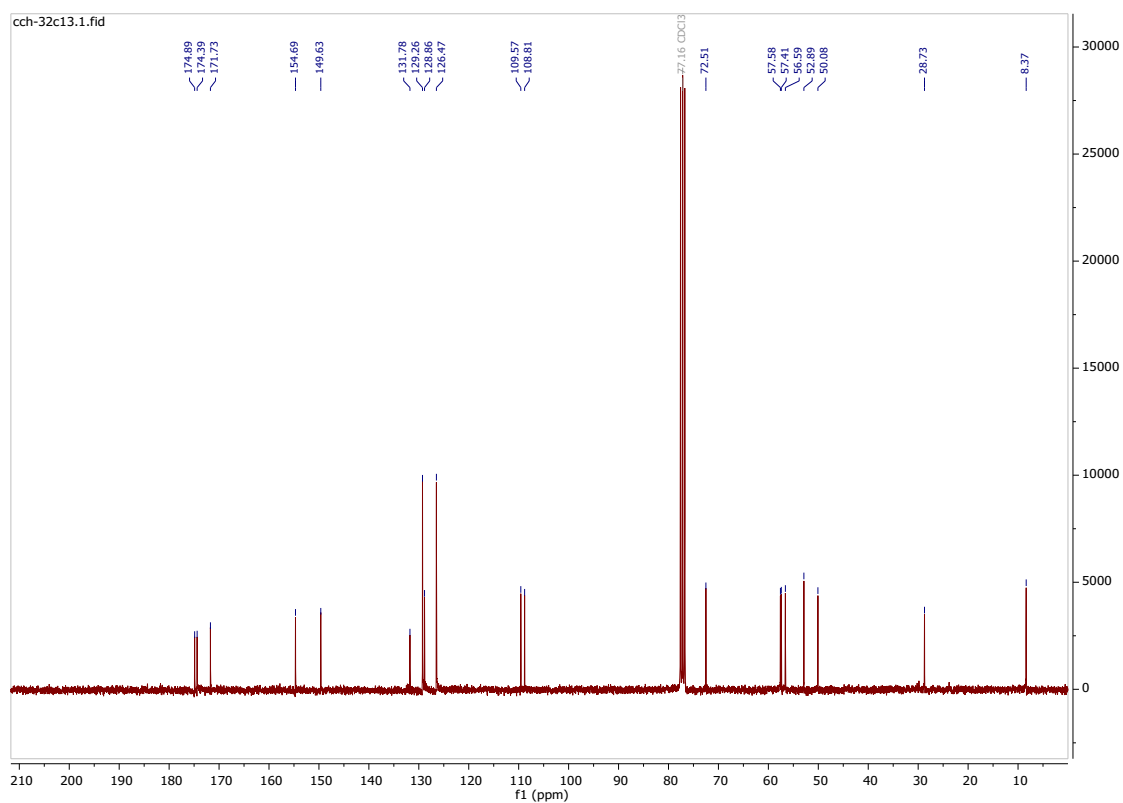

**Methyl (1*S*,3*R*,3*aS*,6*aR*)-3-(5-(hydroxymethyl)furan-2-yl)-1-isobutyl-4,6-dioxo-5-phenyloctahydropyrrolo[3,4-*c*]pyrrole-1-carboxylate (3*c*-endo+ 12% 3*c*-exo)**

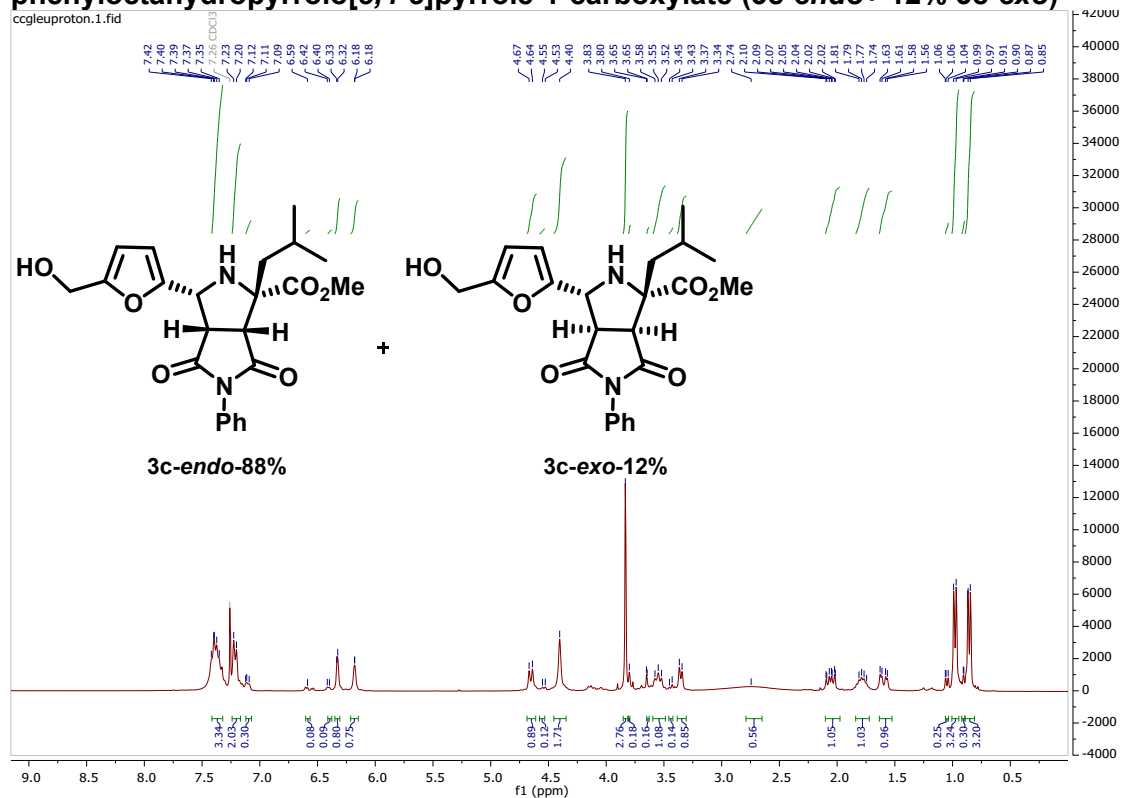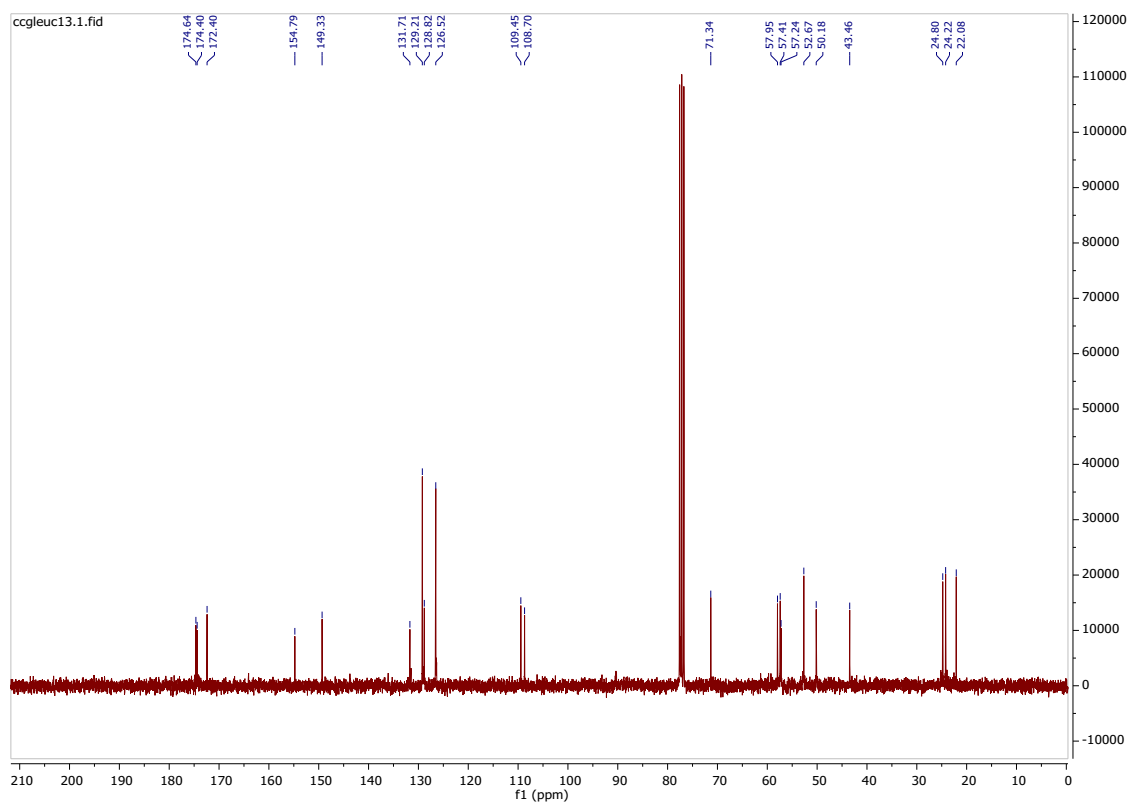

**Ethyl (1*S*,3*R*,3*aS*,6*aR*)-1-benzyl-3-(5-(hydroxymethyl)furan-2-yl)-4,6-dioxo-5-phenyloctahydropyrrolo[3,4-*c*]pyrrole-1-carboxylate (3d-endo+ 7% 3d-exo)**

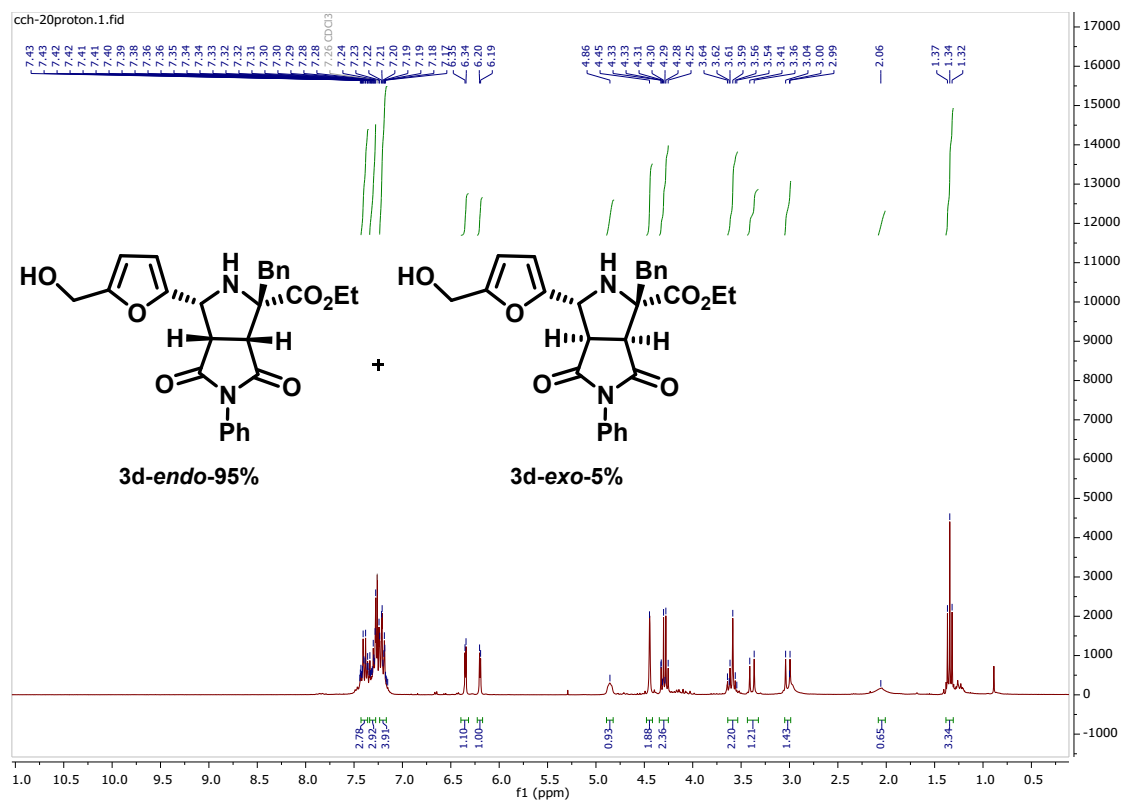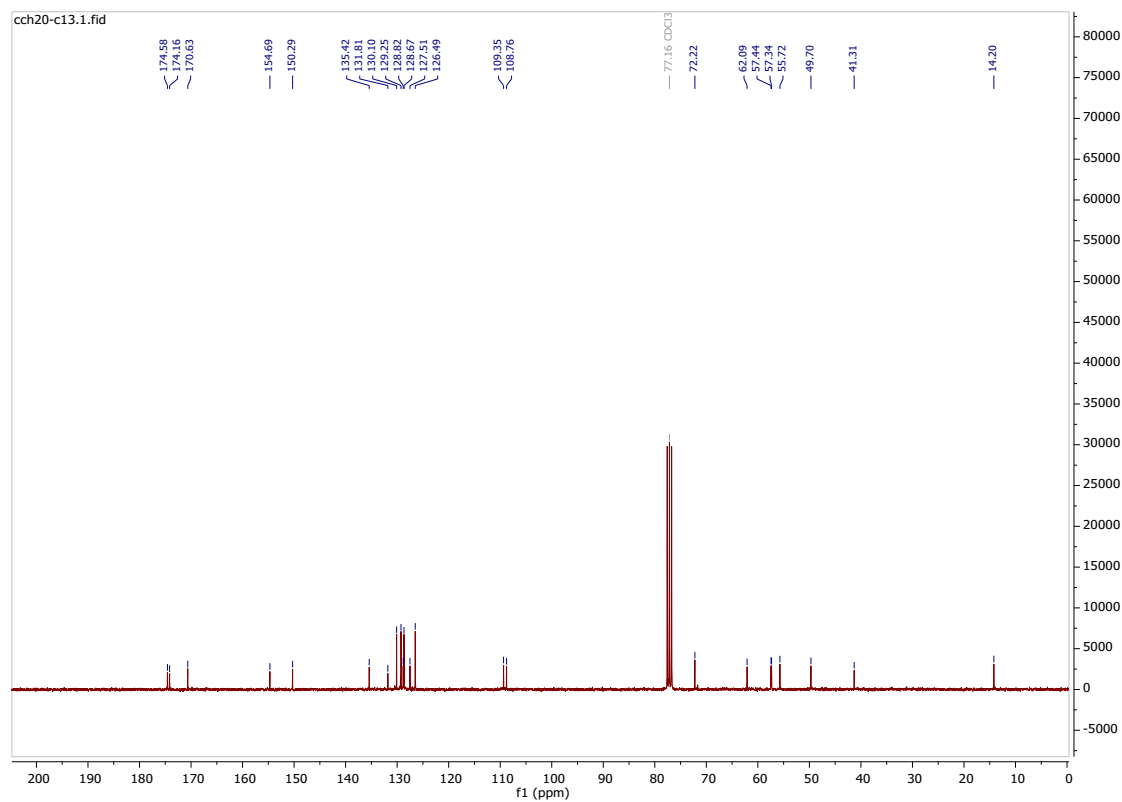

**Methyl (1*R*,3*R*,3*aS*,6*aR*)-3-(5-(hydroxymethyl)furan-2-yl)-4,6-dioxo-1,5-diphenyloctahydropyrrolo[3,4-*c*]pyrrole-1-carboxylate (3e)**

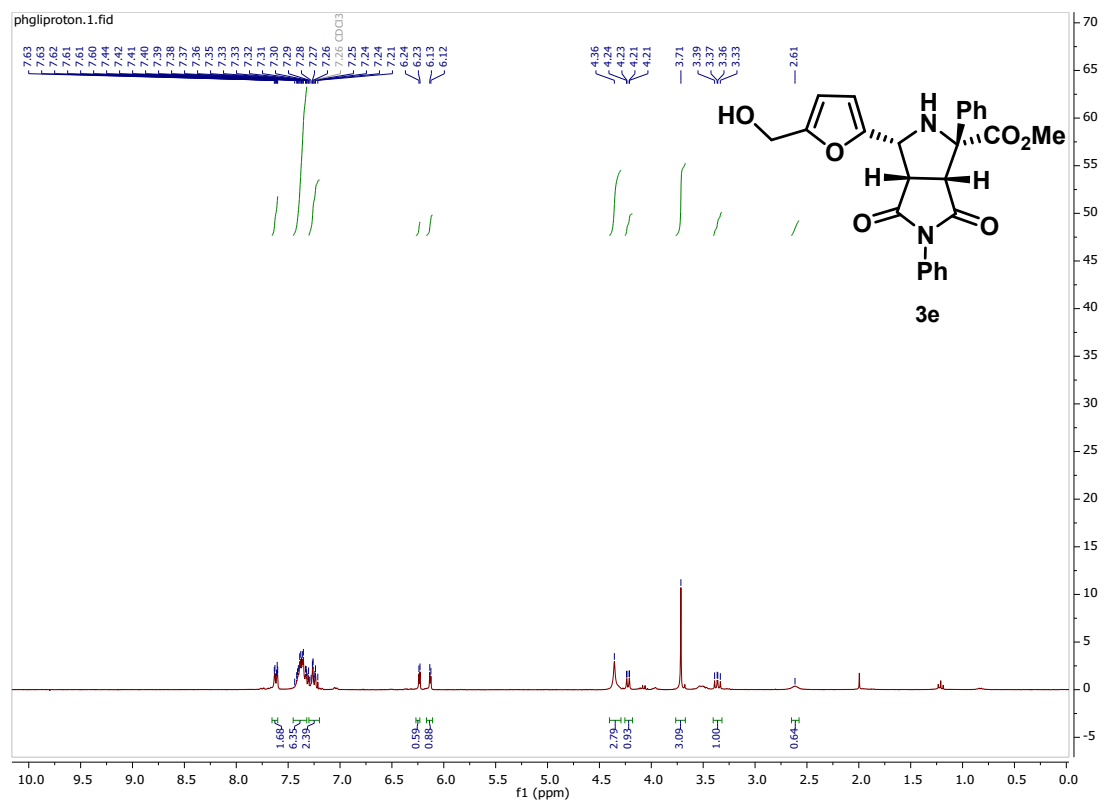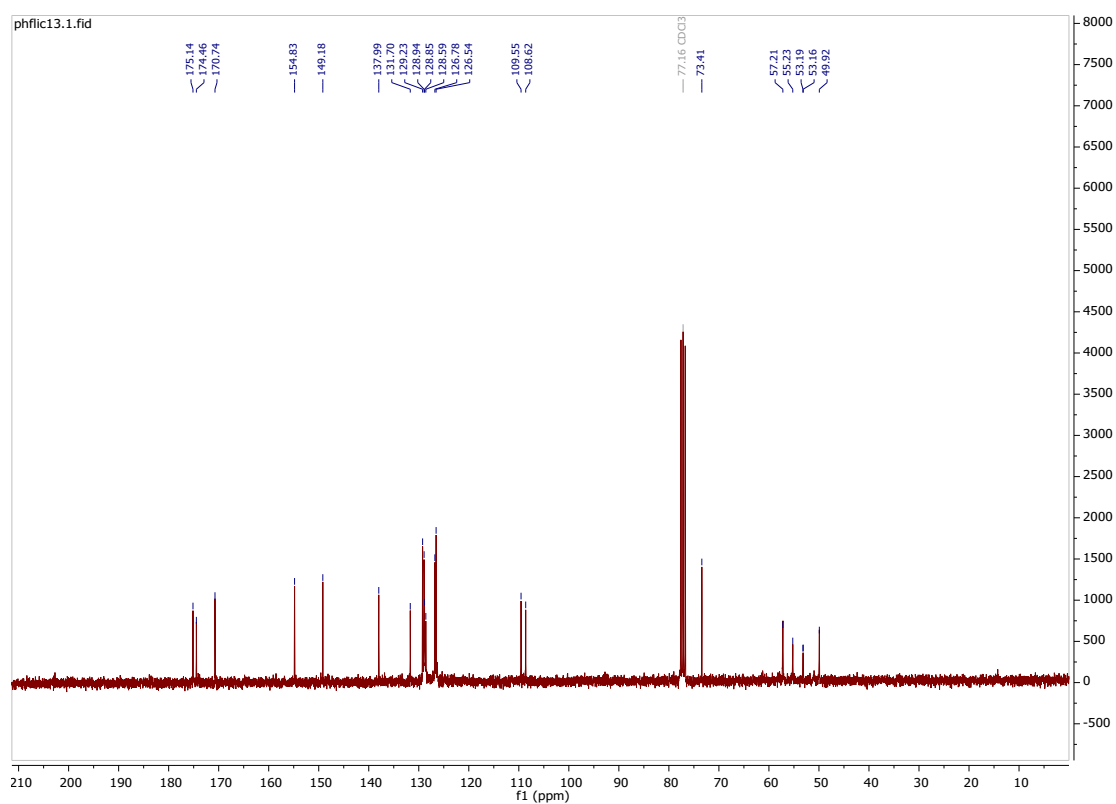

**Methyl (1*R*,3*R*,3*aS*,6*aR*)-1-tert-butoxymethyl-3-(5-(hydroxymethyl)furan-2-yl)-4,6-dioxo-5-phenyloctahydropyrrolo[3,4-*c*]pyrrole-1-carboxylate (3f-endo+ 13% 3f-exo)**

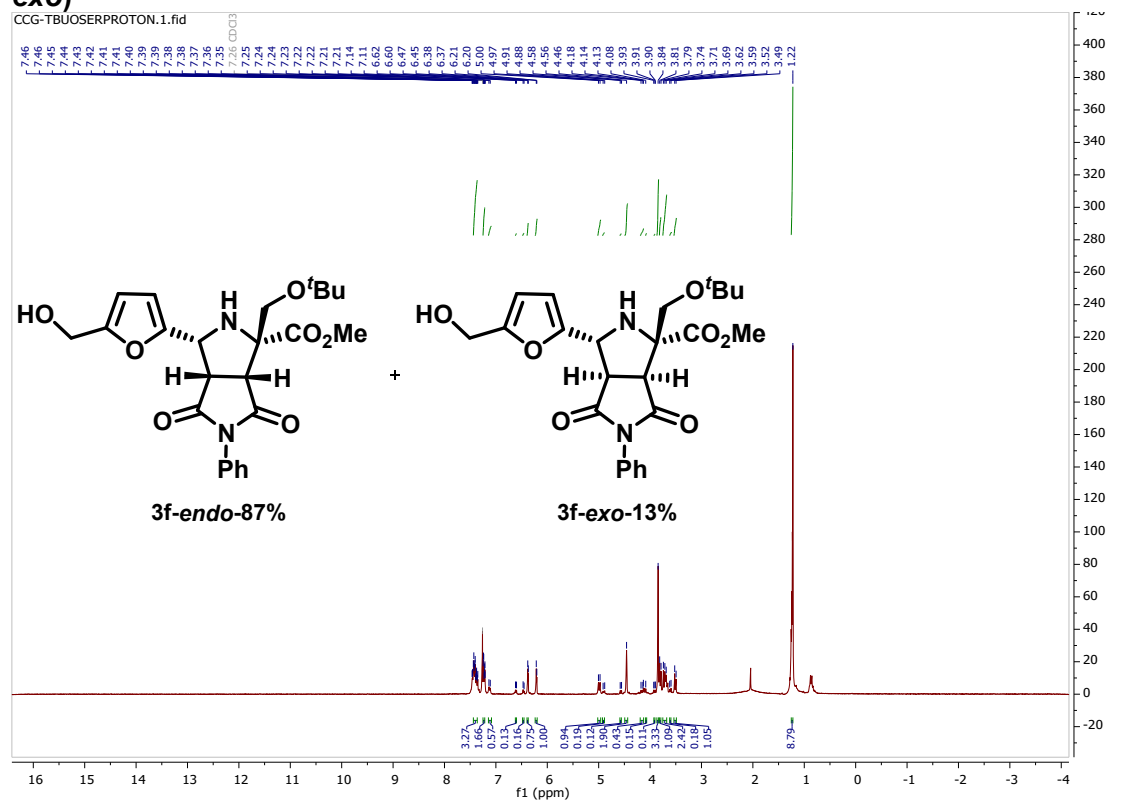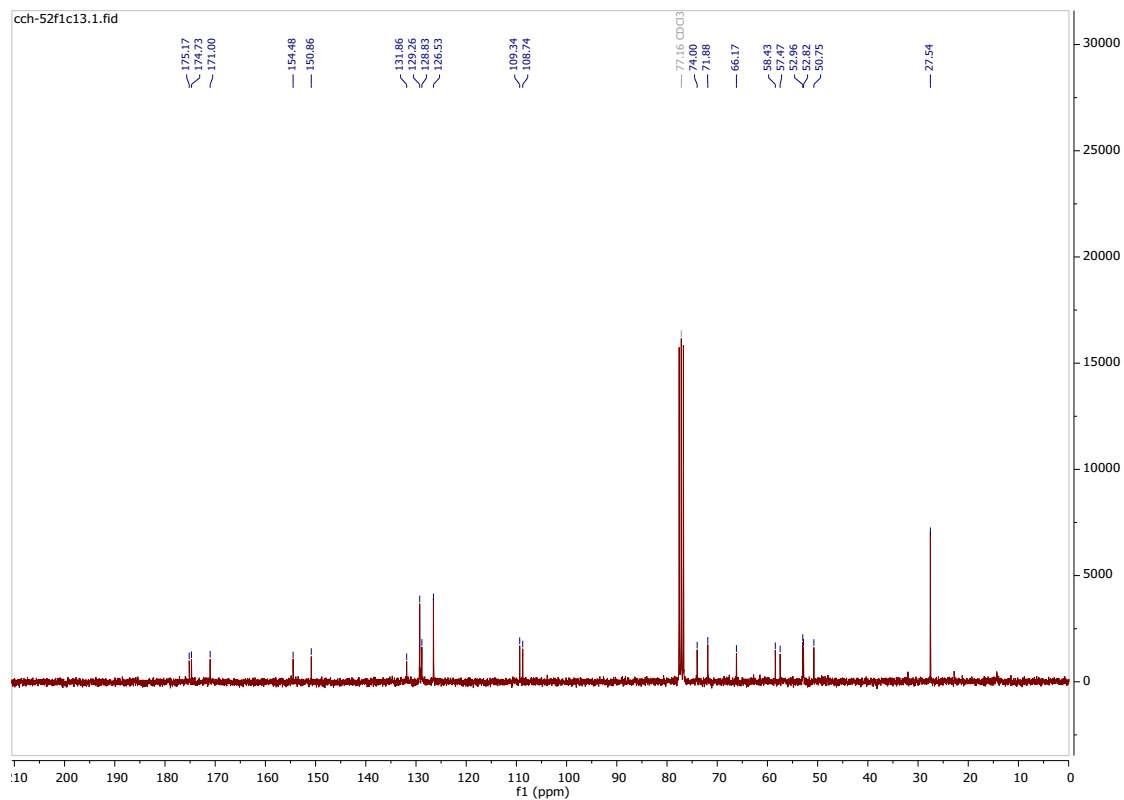

**Methyl (1*S*,3*R*,3*aS*,6*aR*)-3-(5-(hydroxymethyl)furan-2-yl)-1-(2-methylthioethyl)-4,6-dioxo-5-phenyloctahydropyrrolo[3,4-*c*]pyrrole-1-carboxylate (3g)**

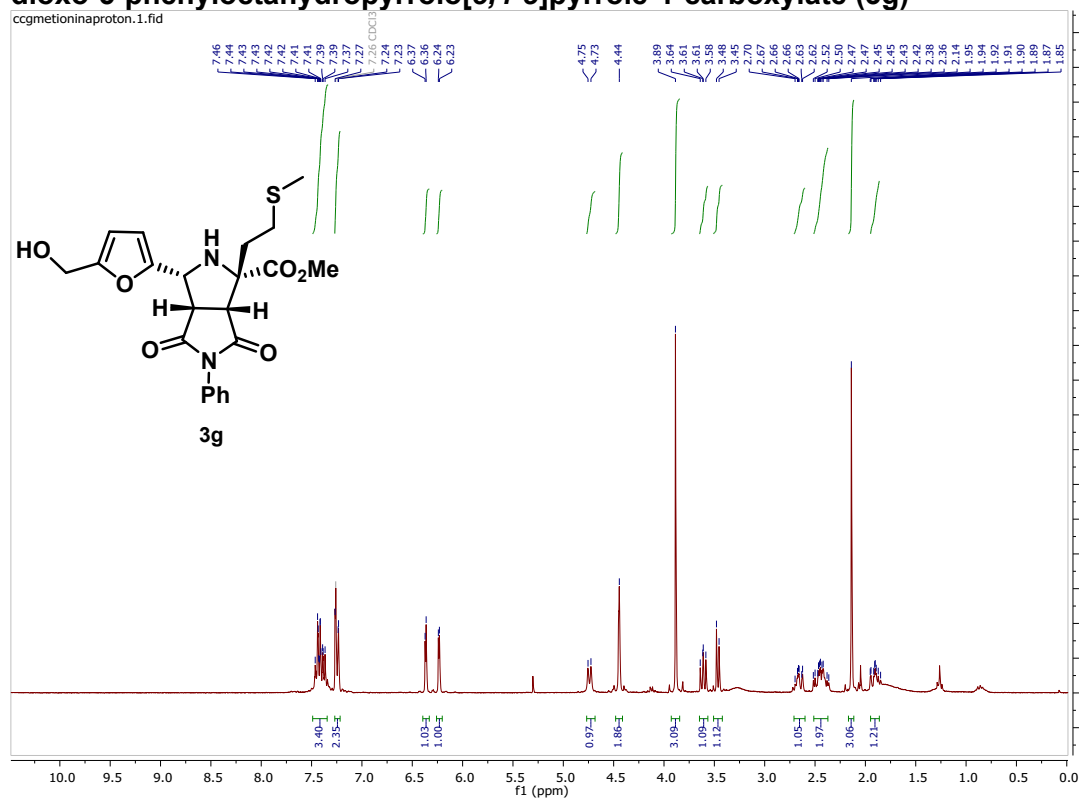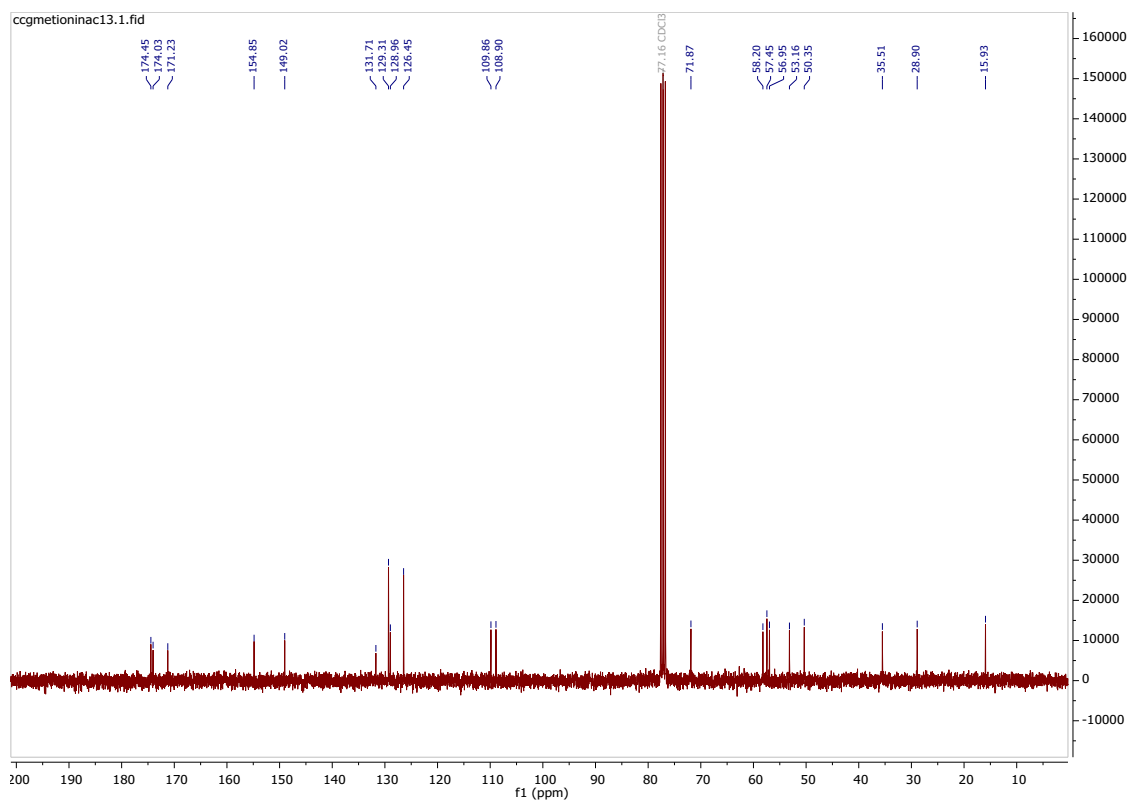

**Methyl (1*S*,3*R*,3*aS*,6*aR*)-1-benzylthiomethyl-3-(5-(hydroxymethyl)furan-2-yl)-4,6-dioxo-5-phenyloctahydropyrrolo[3,4-*c*]pyrrole-1-carboxylate (3h)**

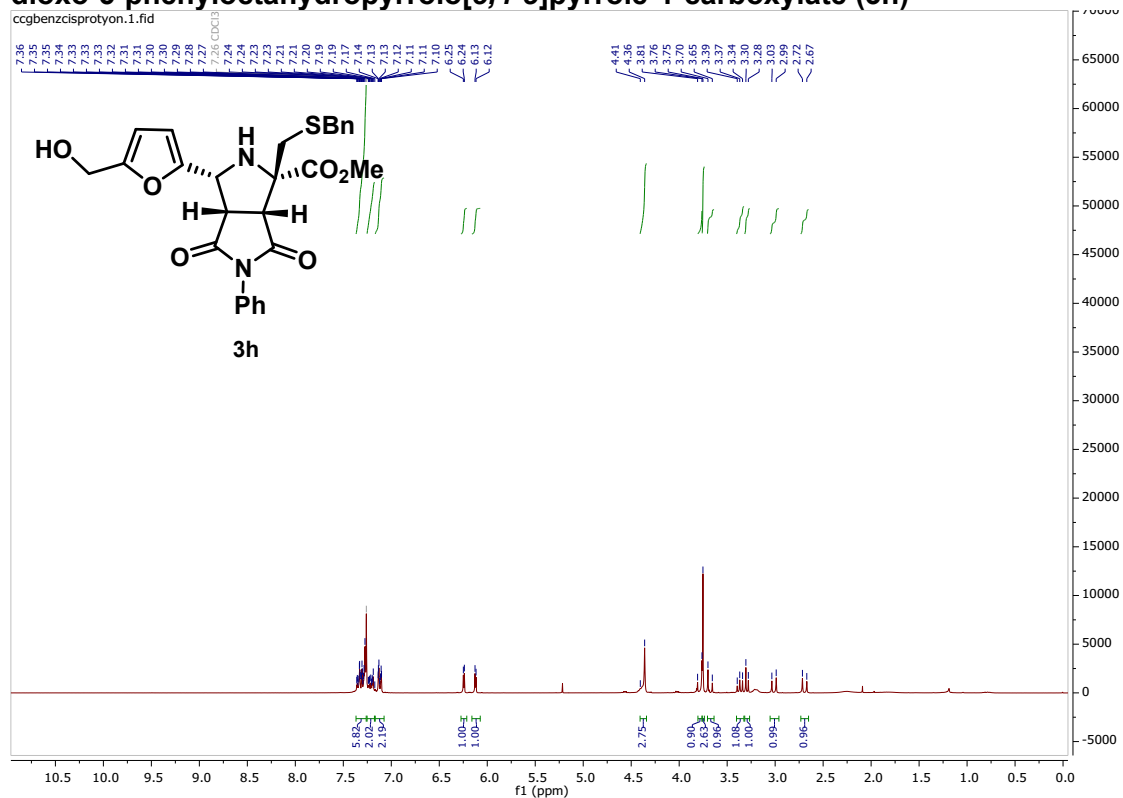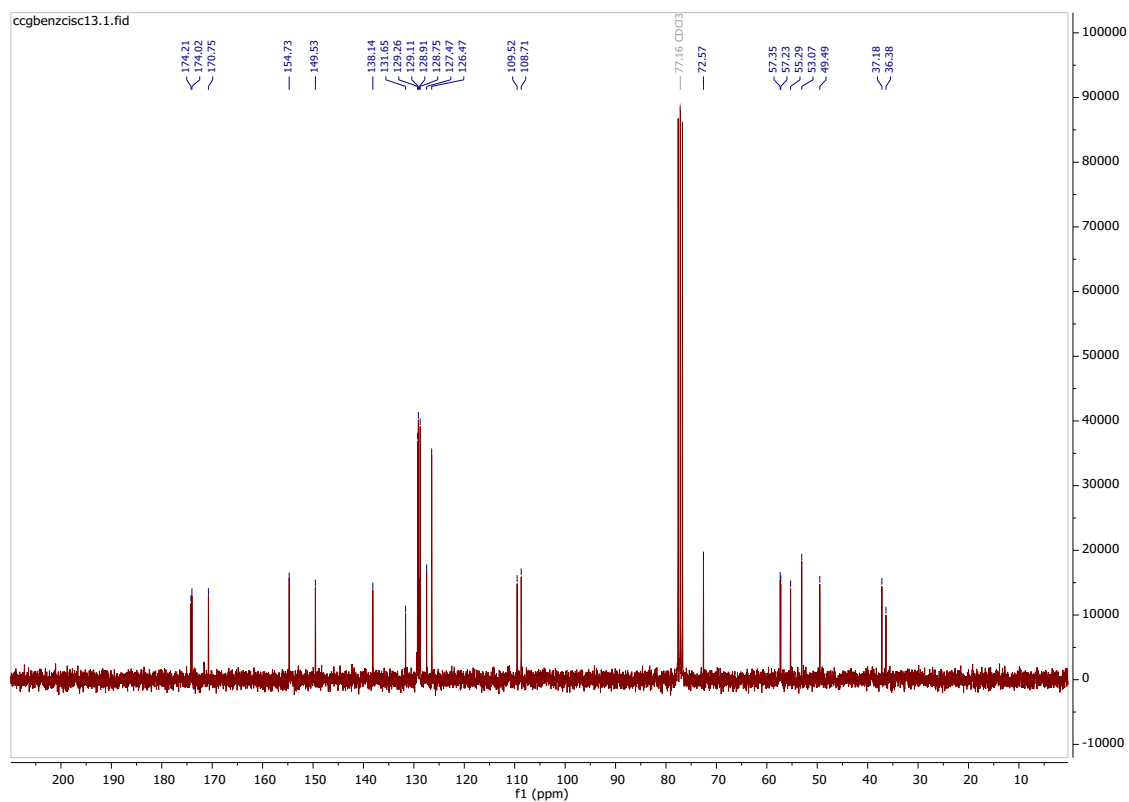

**Methyl (1*S*,3*R*,3*aS*,6*aR*)-3-(5-(hydroxymethyl)furan-2-yl)-4,6-dioxo-5-phenyloctahydropyrrolo[3,4-*c*]pyrrole-1-carboxylate (3i)**

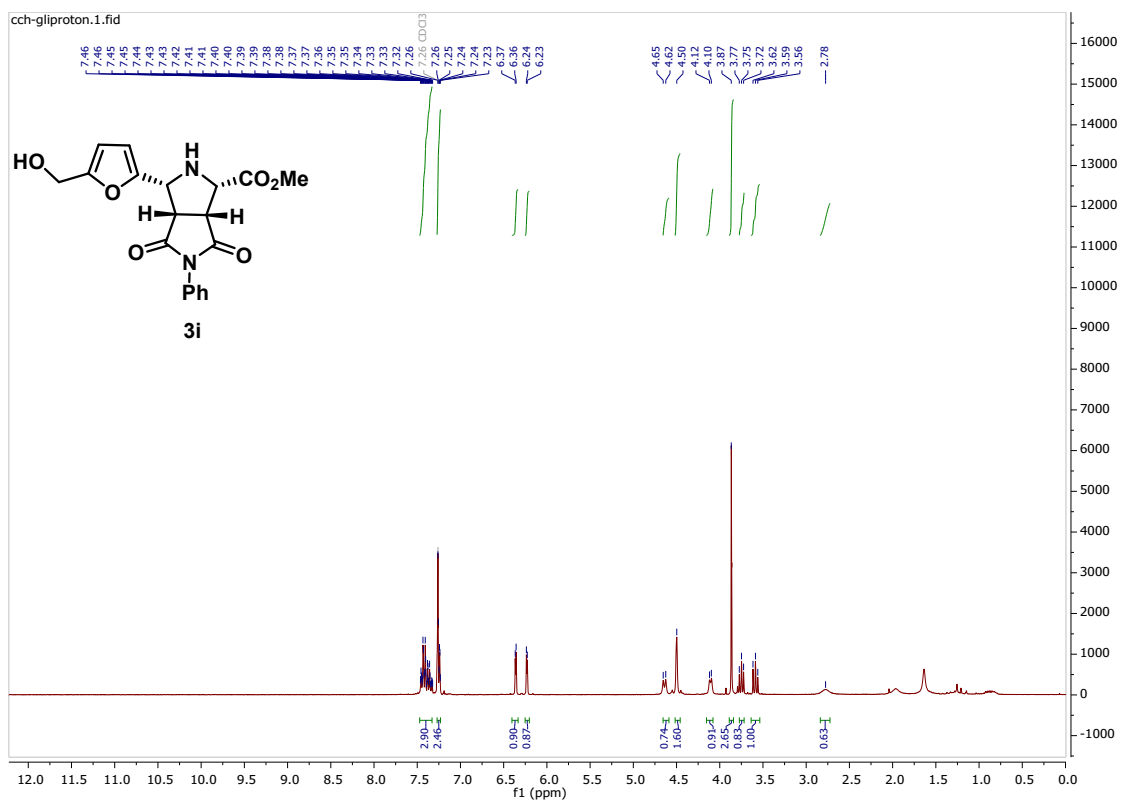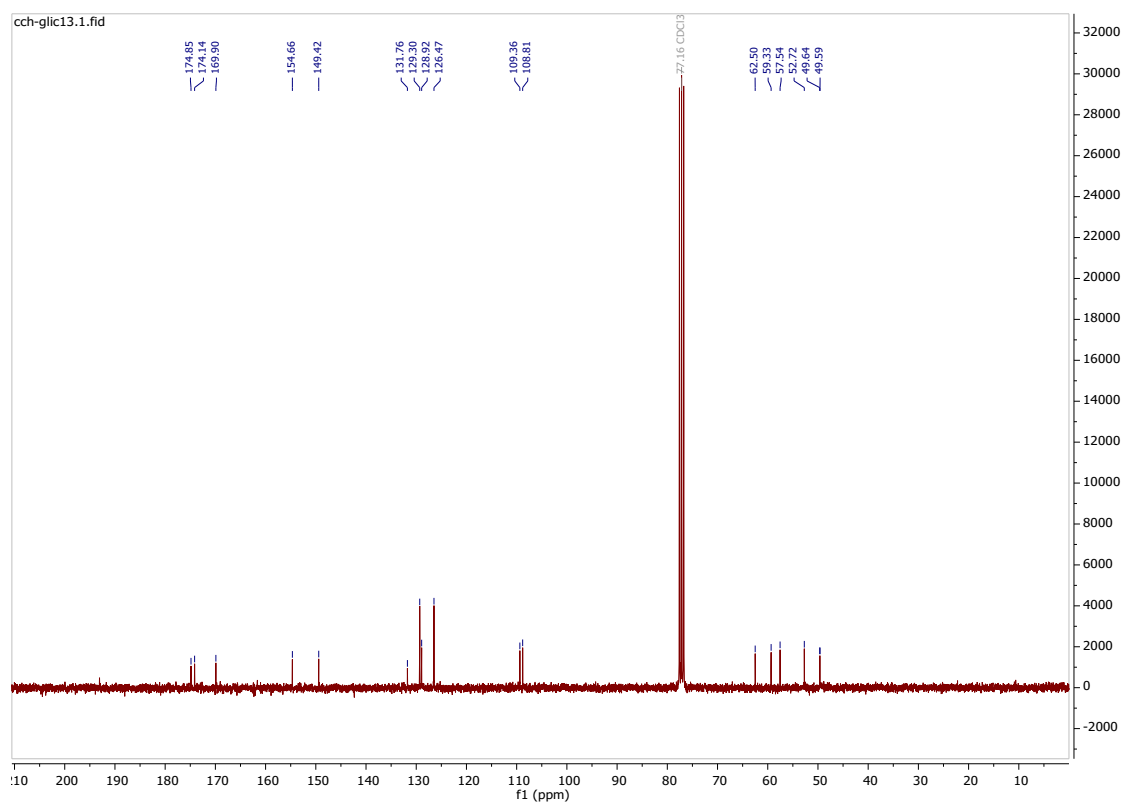

**Methyl (1*S*,3*R*,3*aS*,6*aR*)-3-(5-methylfuran-2-yl)-4,6-dioxo-5-phenyloctahydropyrrolo[3,4-*c*]pyrrole-1-carboxylate (3j)**

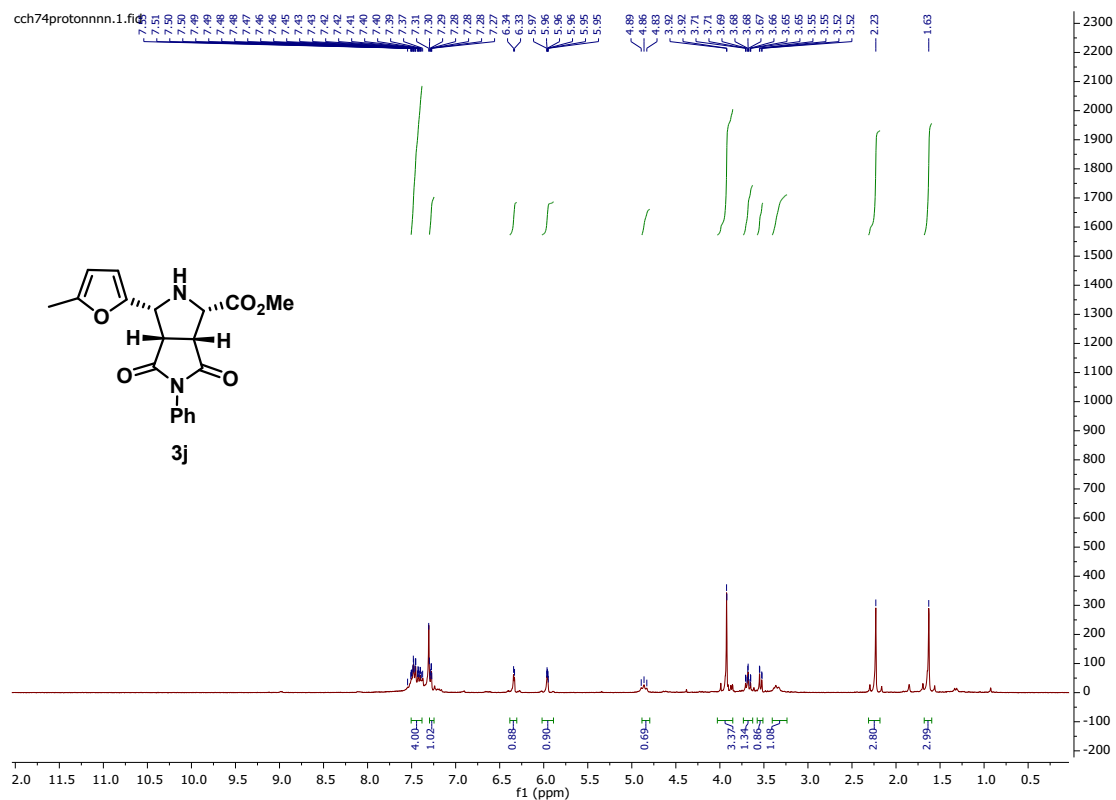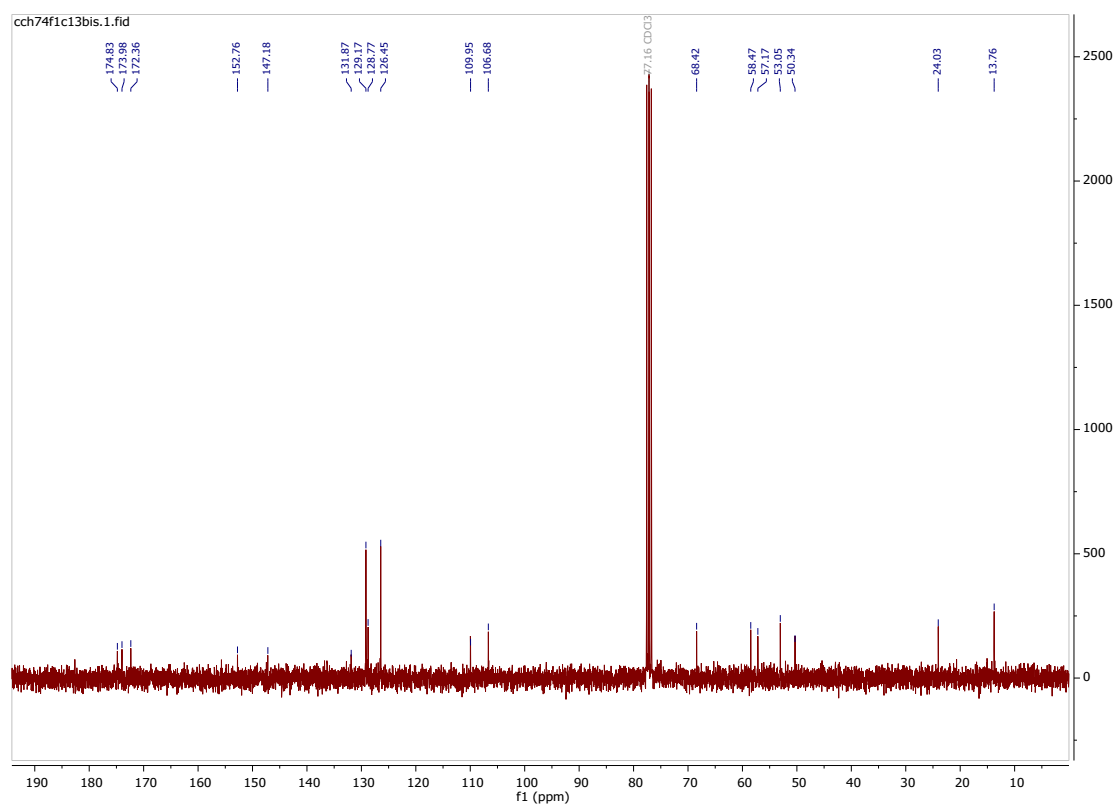

**Methyl (1*S*,3*R*,3*aS*,6*aR*)-4,6-dioxo-5-phenyl-3-(5-(triisopropylsilyloxymethyl)furan-2-yl)octahydropyrrolo[3,4-*c*]pyrrole-1-carboxylate (3k)**

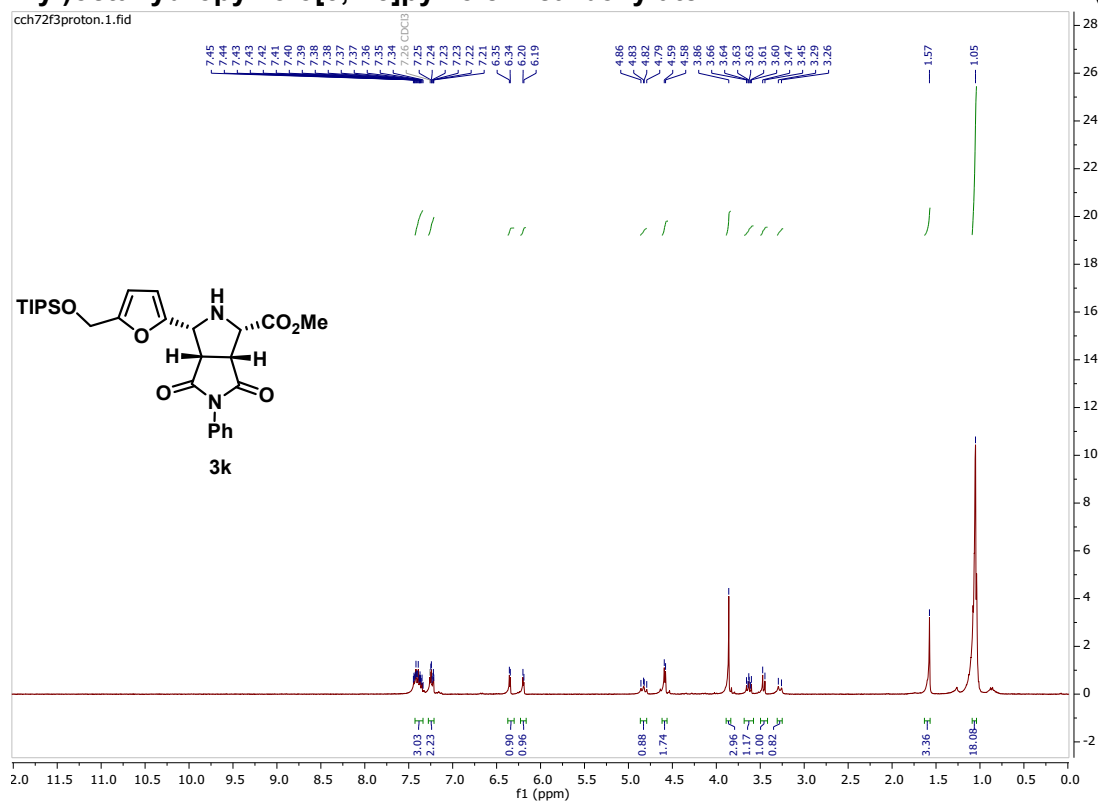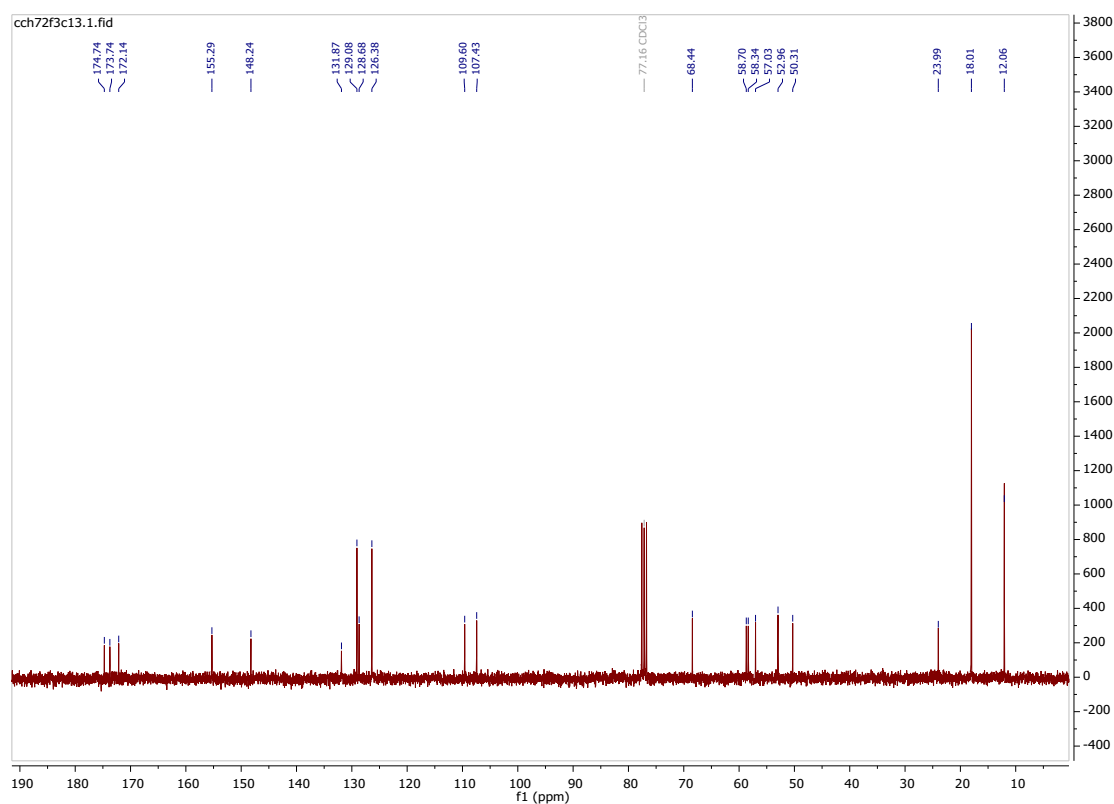

**Methyl (1*S*,3*R*,3*aS*,6*aR*)-3-(5-((methoxymethoxy)methyl)furan-2-yl)-4,6-dioxo-5-phenyloctahydropyrrolo[3,4-*c*]pyrrole-1-carboxylate (3I)**

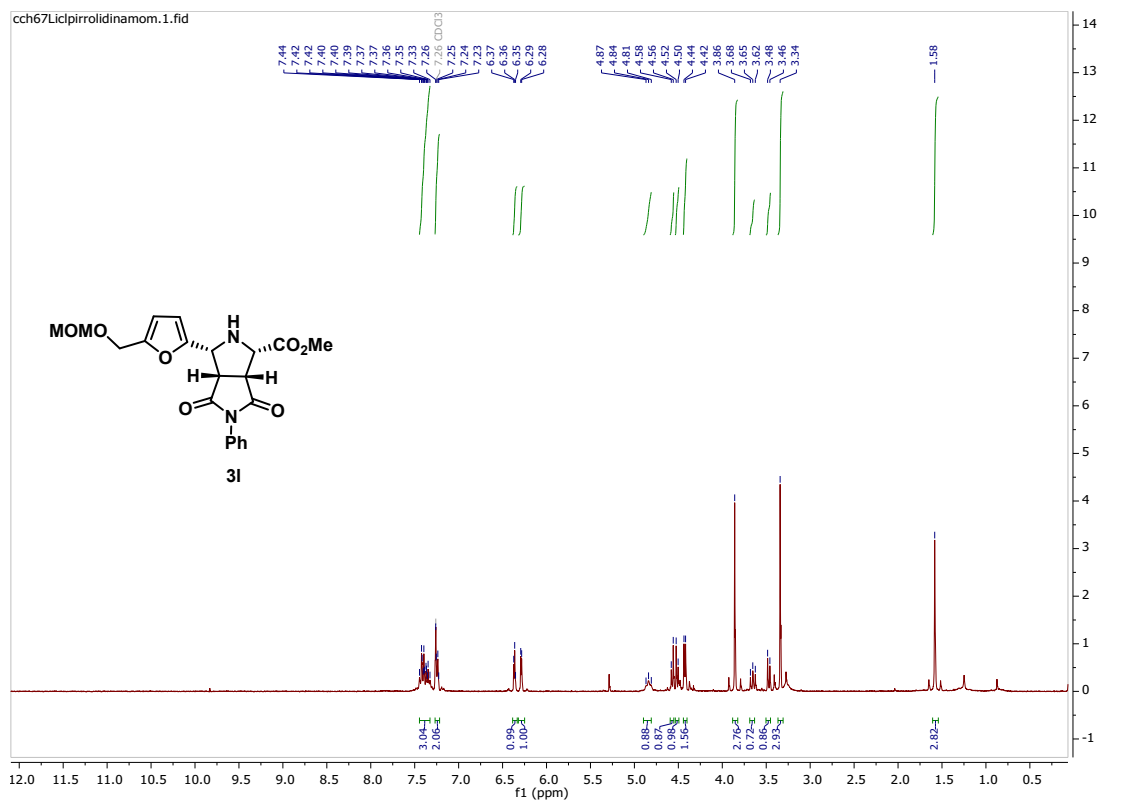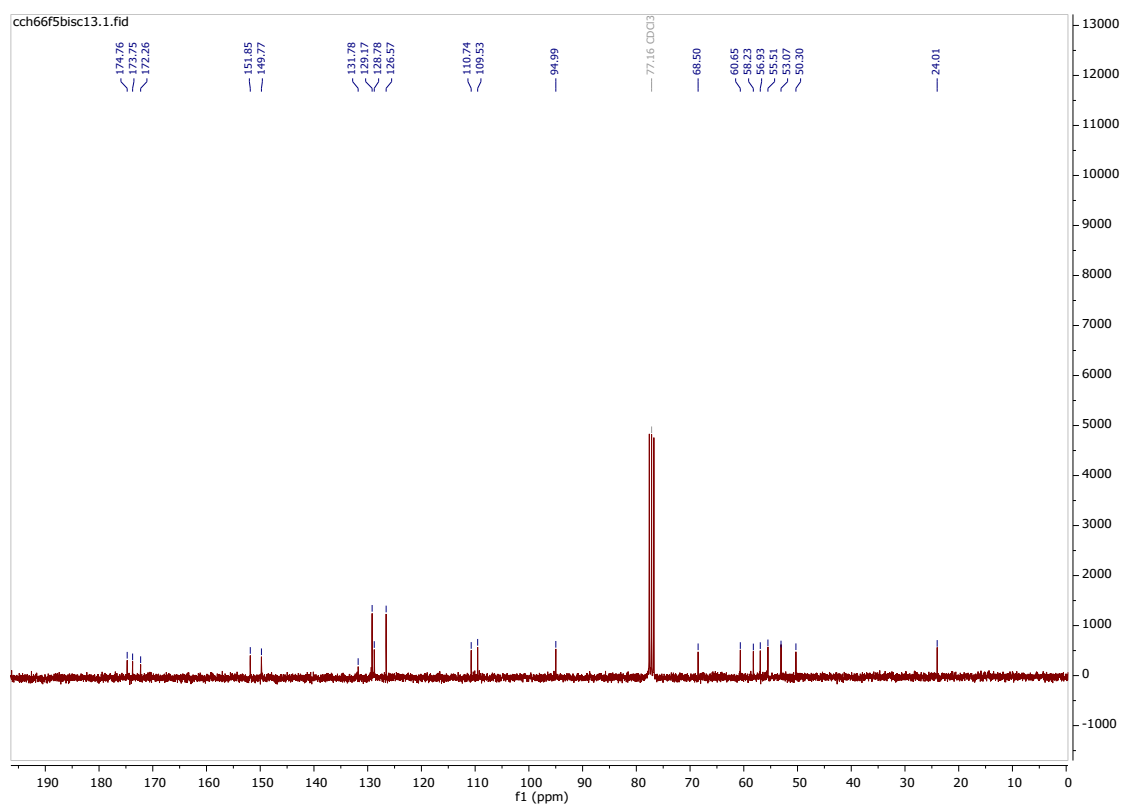

**Trimethyl (2*S*,3*S*,4*S*,5*R*)-5-(5-(hydroxymethyl)furan-2-yl)pyrrolidine-2,3,4-tricarboxylate (9)**

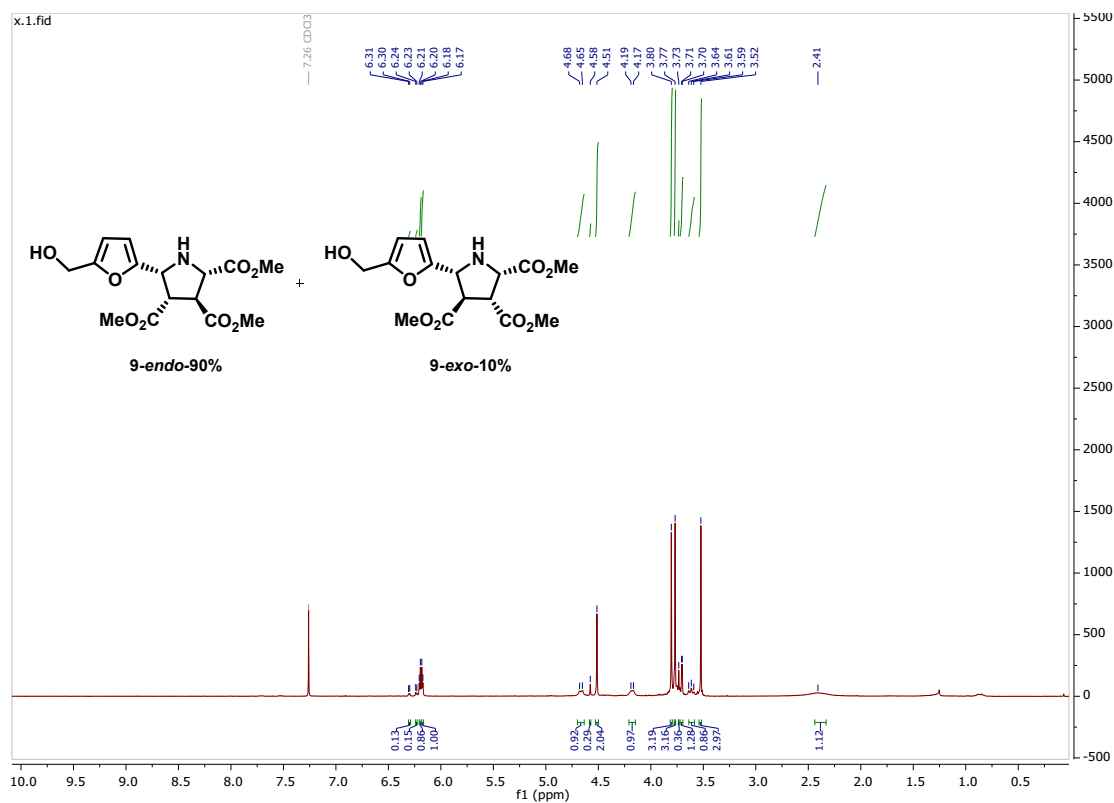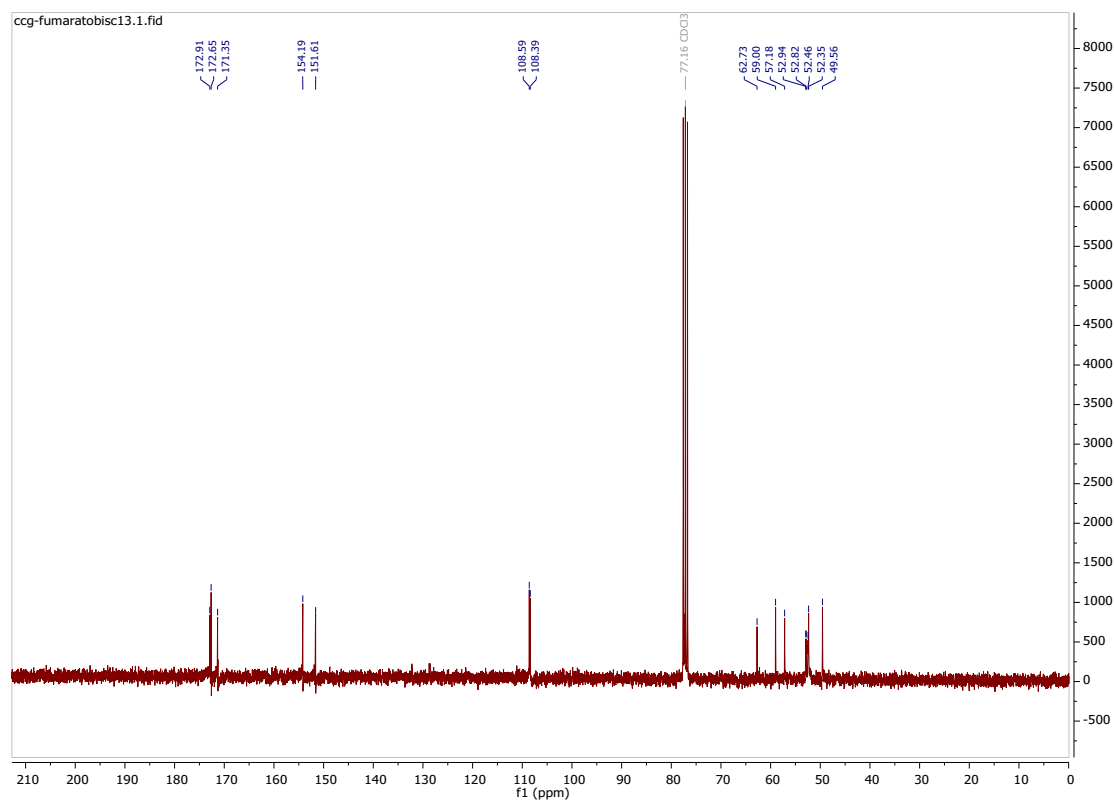

**Trimethyl (2S,3S,4S,5R)-5-(5-(hydroxymethyl)furan-2-yl)-2-methylpyrrolidine-2,3,4-tricarboxylate (10-endo+10% 10-exo)**

400-2432-ccg574f1.1.fid  
ccg-574-F1

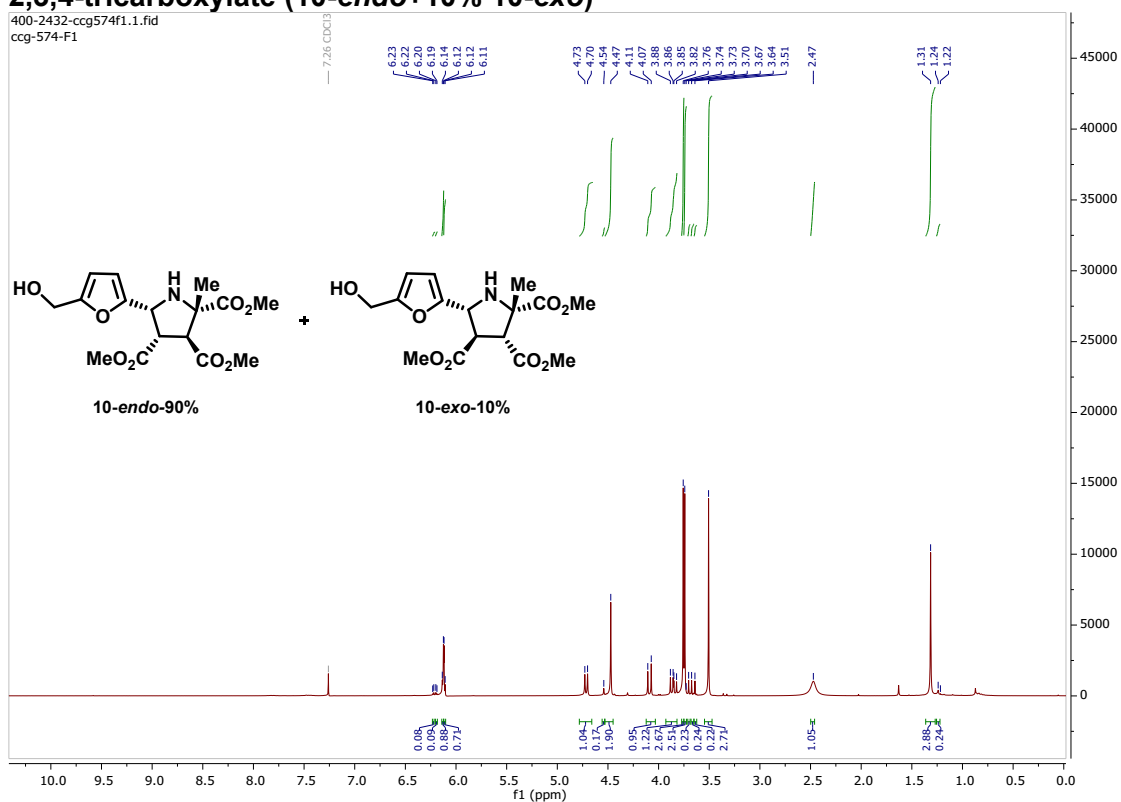

12885t-ccg574f1.1.fid  
ccg574f1

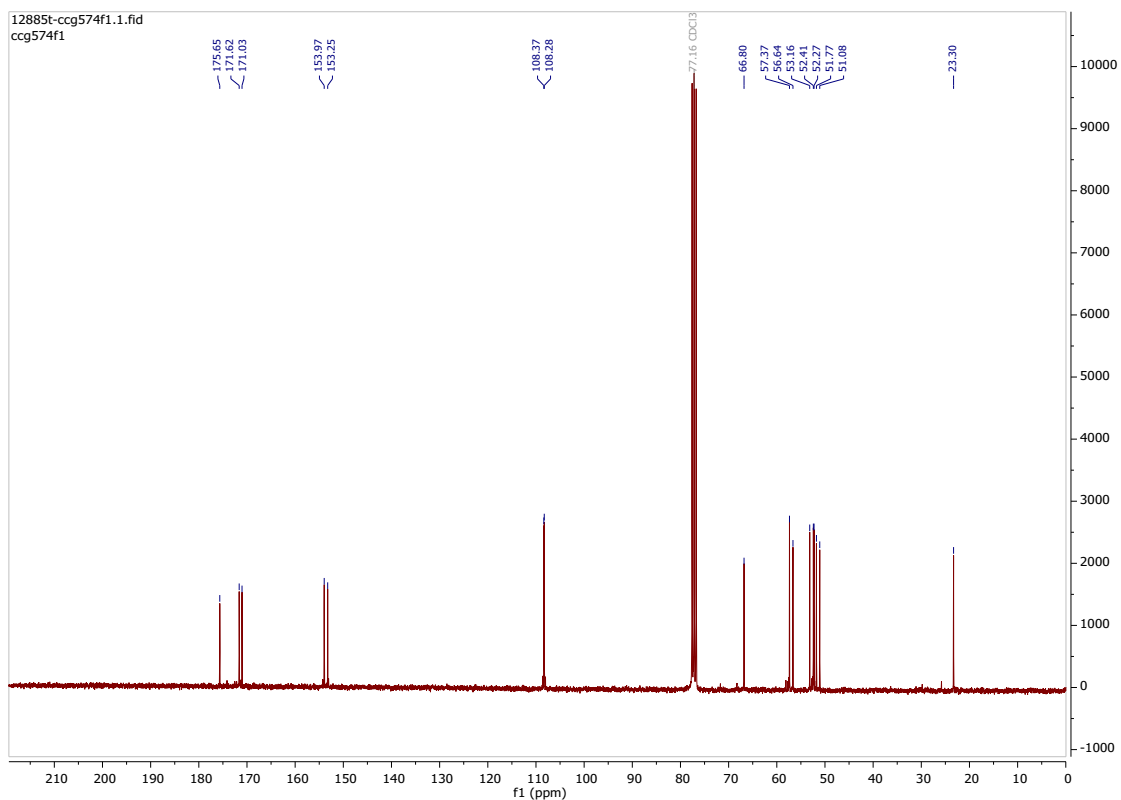

**Trimethyl (2*S*,3*R*,4*S*,5*R*)-5-(5-(hydroxymethyl)furan-2-yl)pyrrolidine-2,3,4-tricarboxylate (11-endo+20% 11-exo)**

400-738-cg498- maleato.1.fid  
ccg-498H

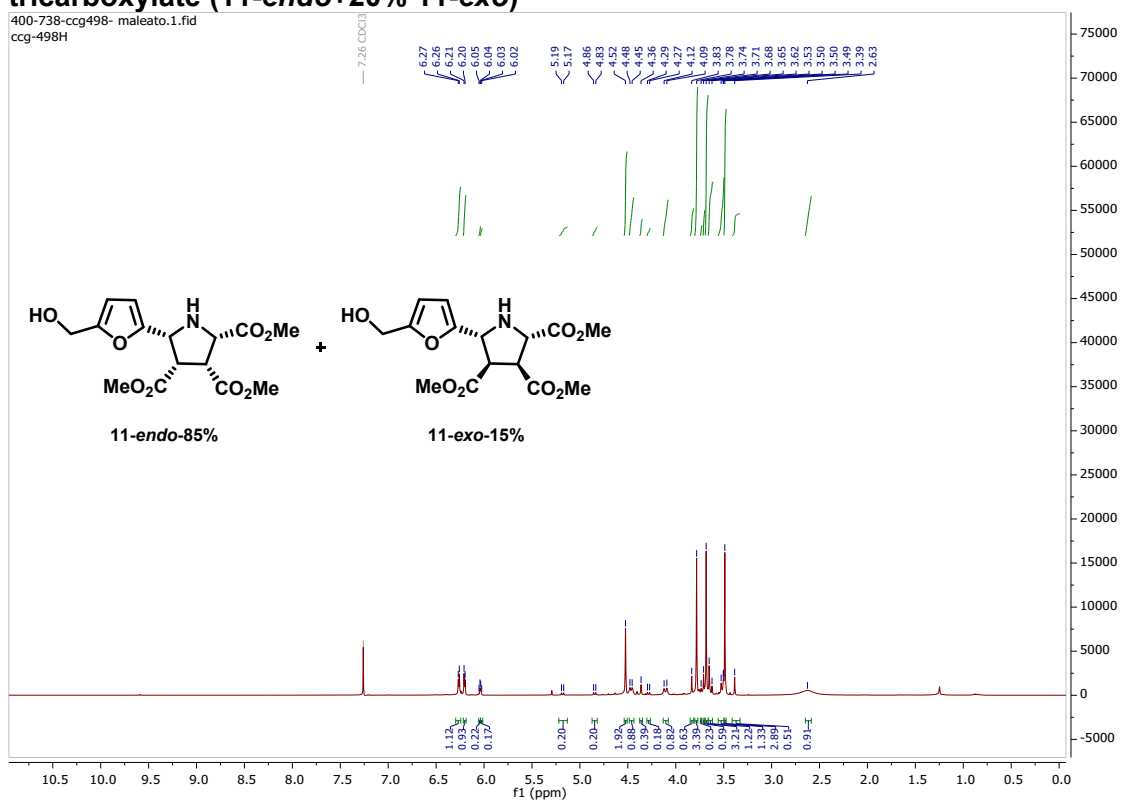

maleato c13.1.fid  
ccg498

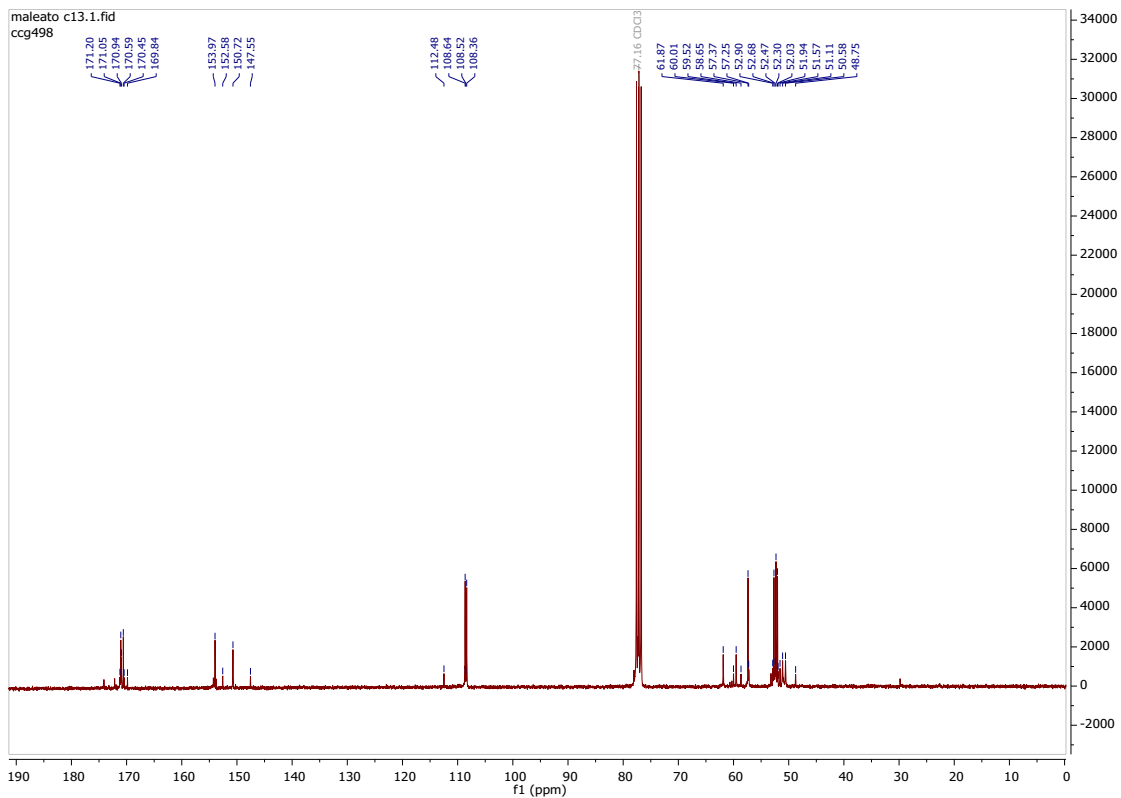

# Dimethyl (2S,4S,5R)-5-(5-(hydroxymethyl)furan-2-yl)pyrrolidine-2,4-dicarboxylate (12)

ccg-acrilato-H.1.fid

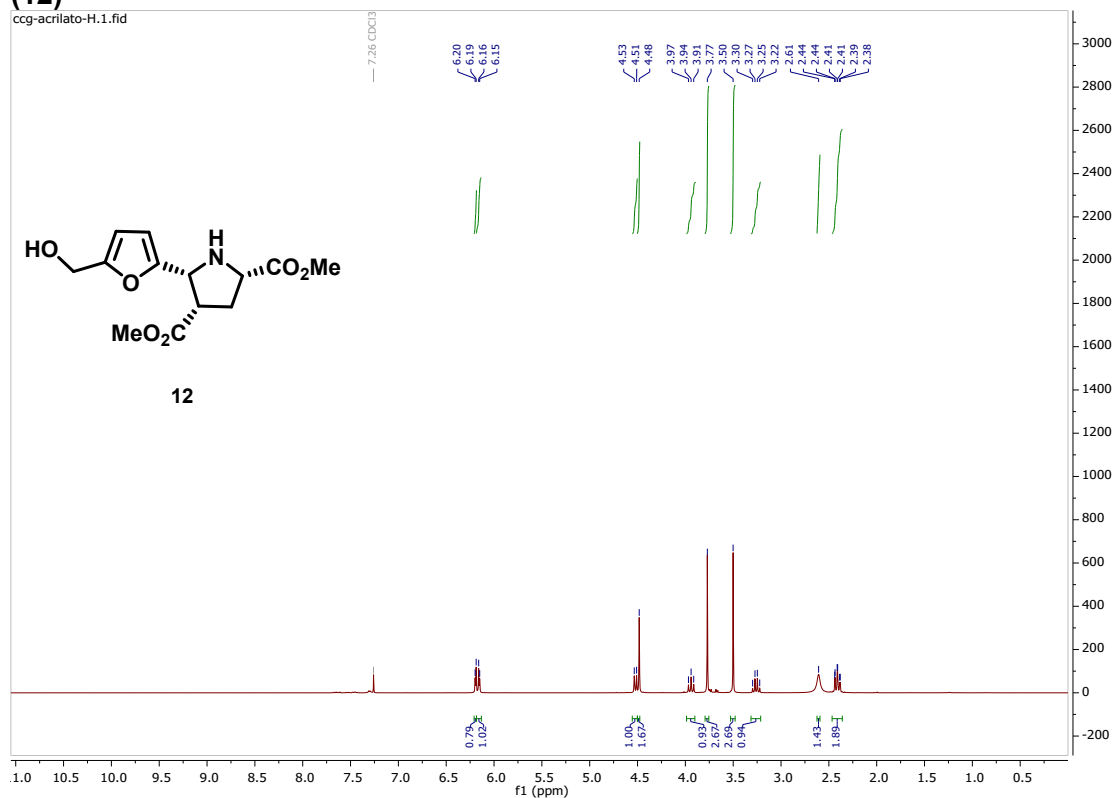

ccg-acrilato-Hc13.1.fid

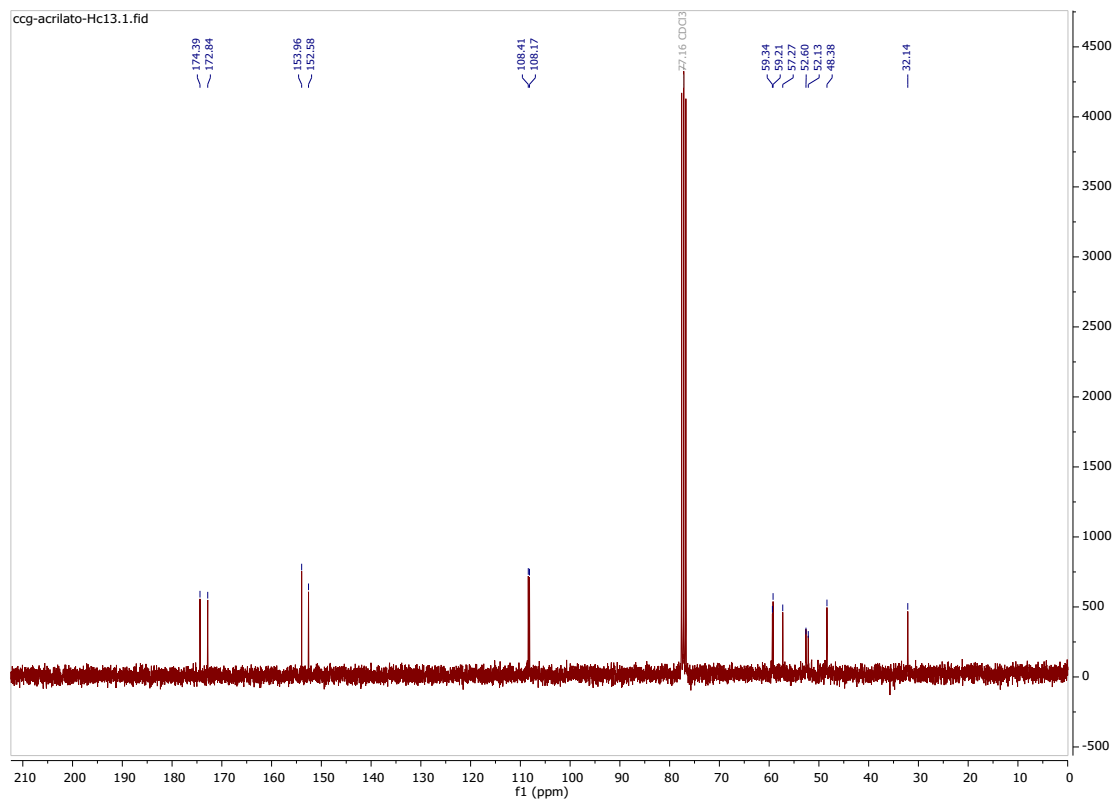

**Methyl (2S,4S,5R)-4-ethyl-4-formyl-5-(5-(hydroxymethyl)furan-2-yl)pyrrolidine-2-carboxylate (13)**

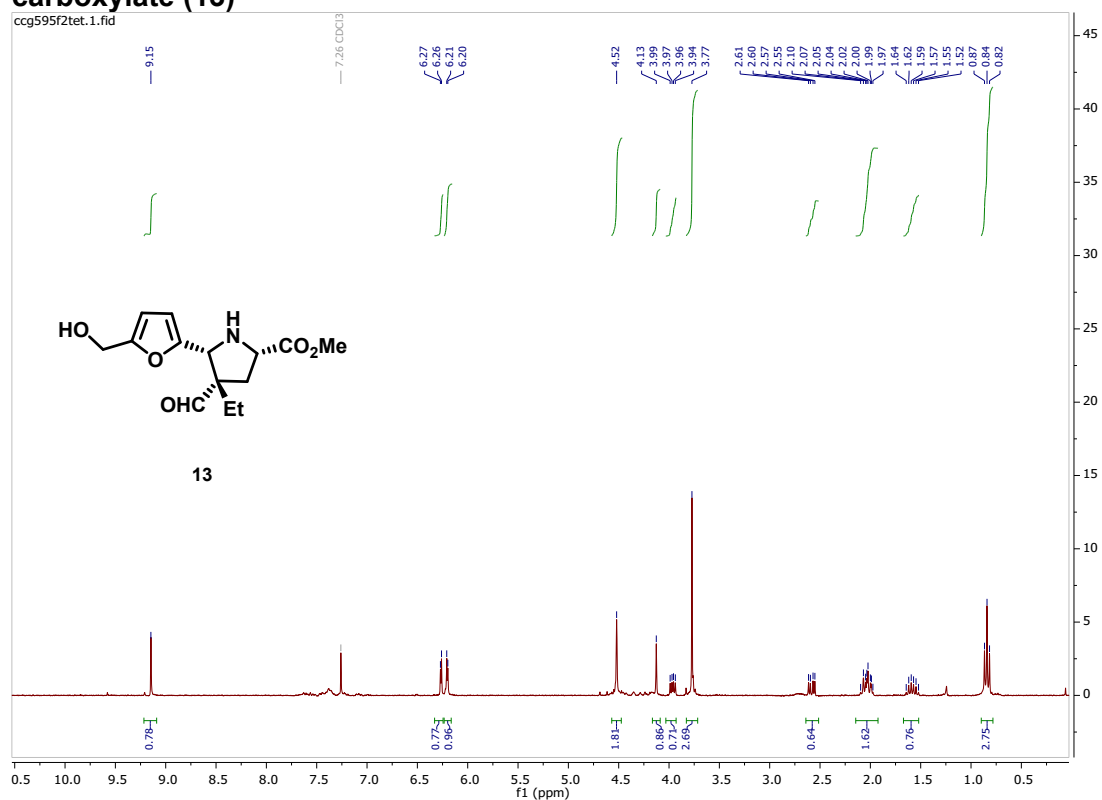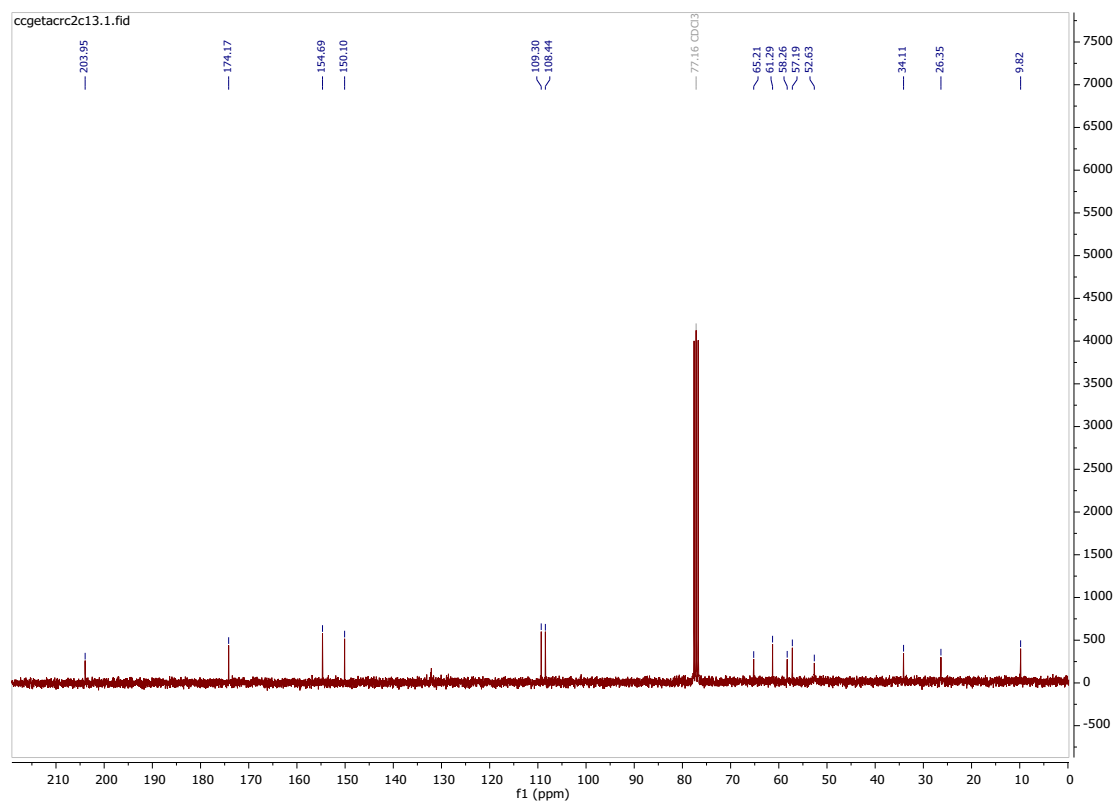

**Methyl (2S,3R,4S,5R)-4-benzoyl-5-(5-(hydroxymethyl)furan-2-yl)-3-phenylpyrrolidine-2-carboxylate (14)**

chalconaglih.1.fid

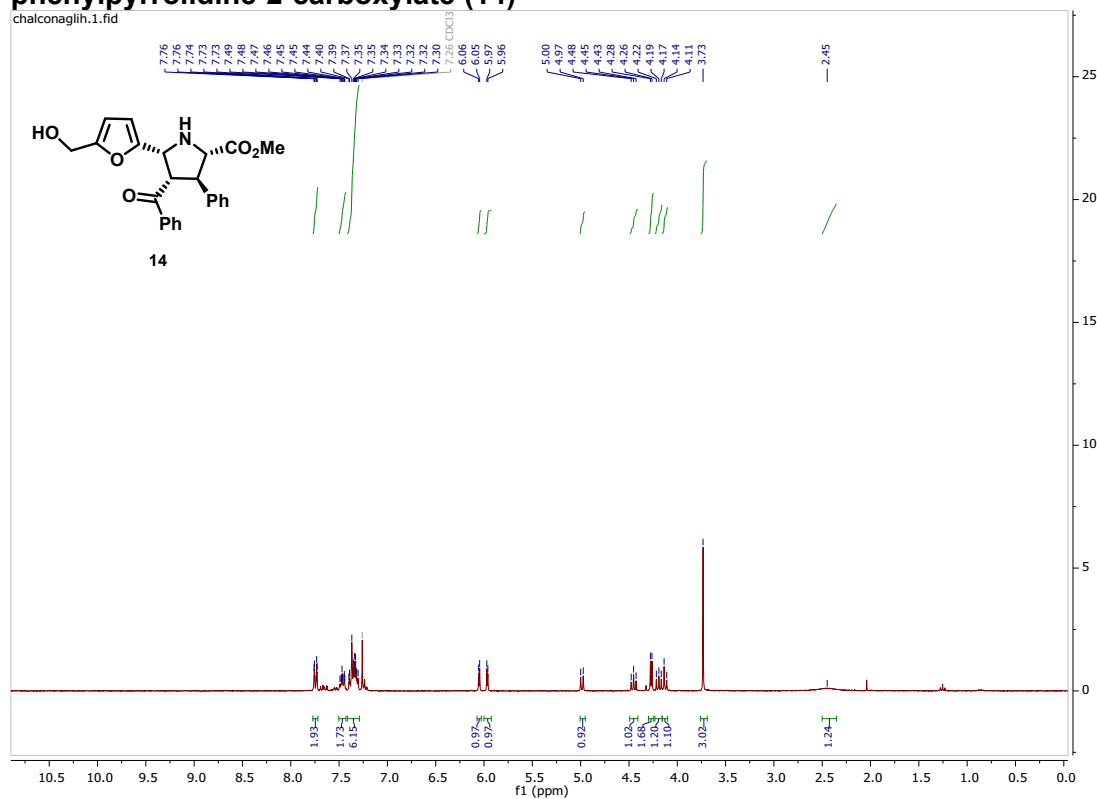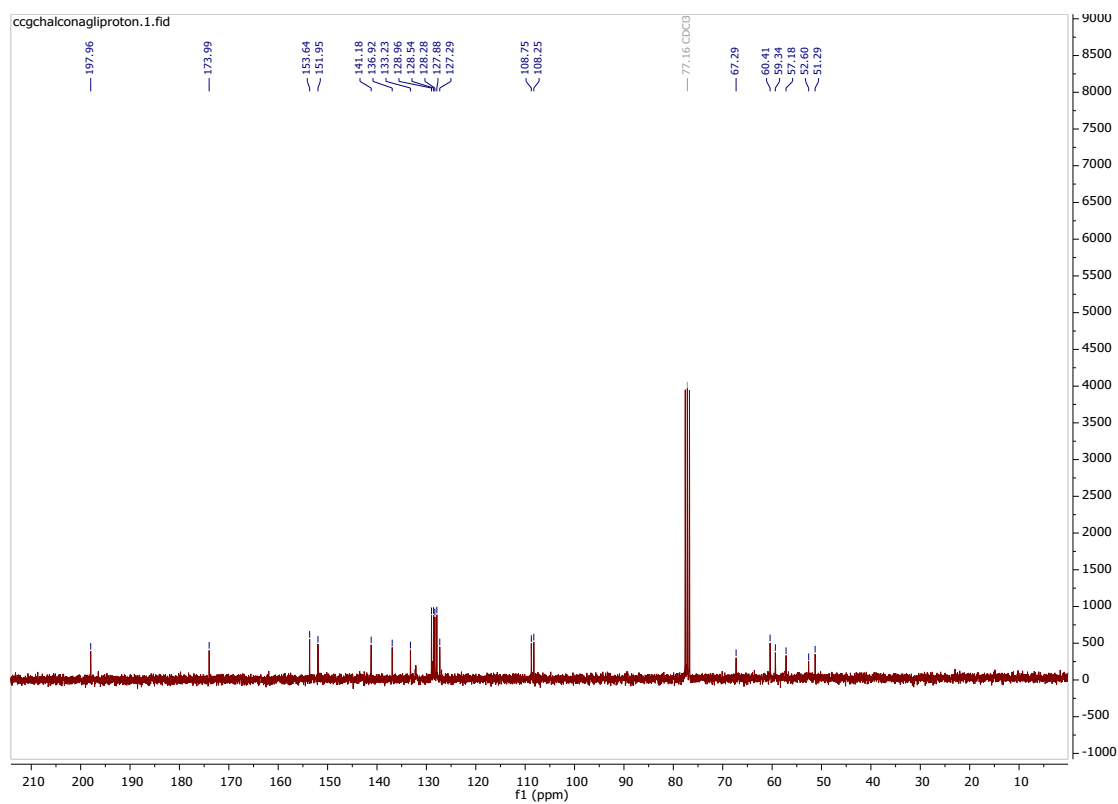

# **Methyl (2S,3R,4R,5R)-5-(5-(hydroxymethyl)furan-2-yl)-3-(4-methoxyphenyl)-2-methyl-4-nitropyrrolidine-2-carboxylate (15)**

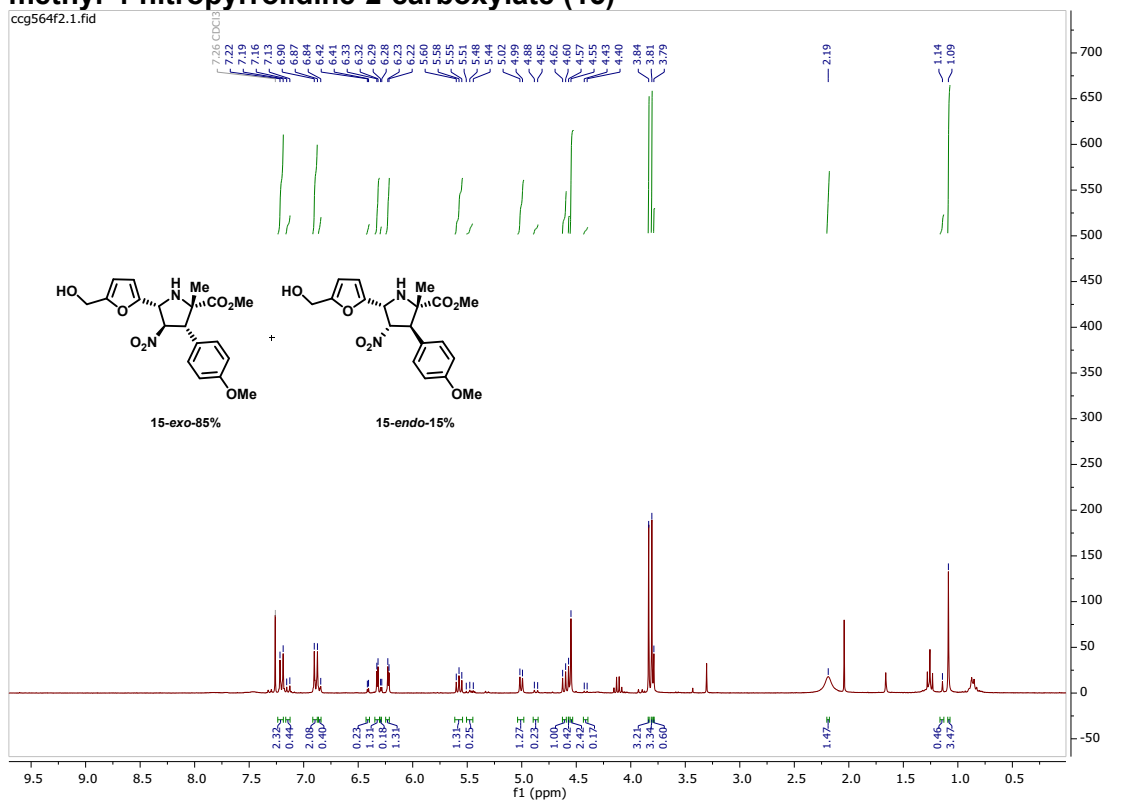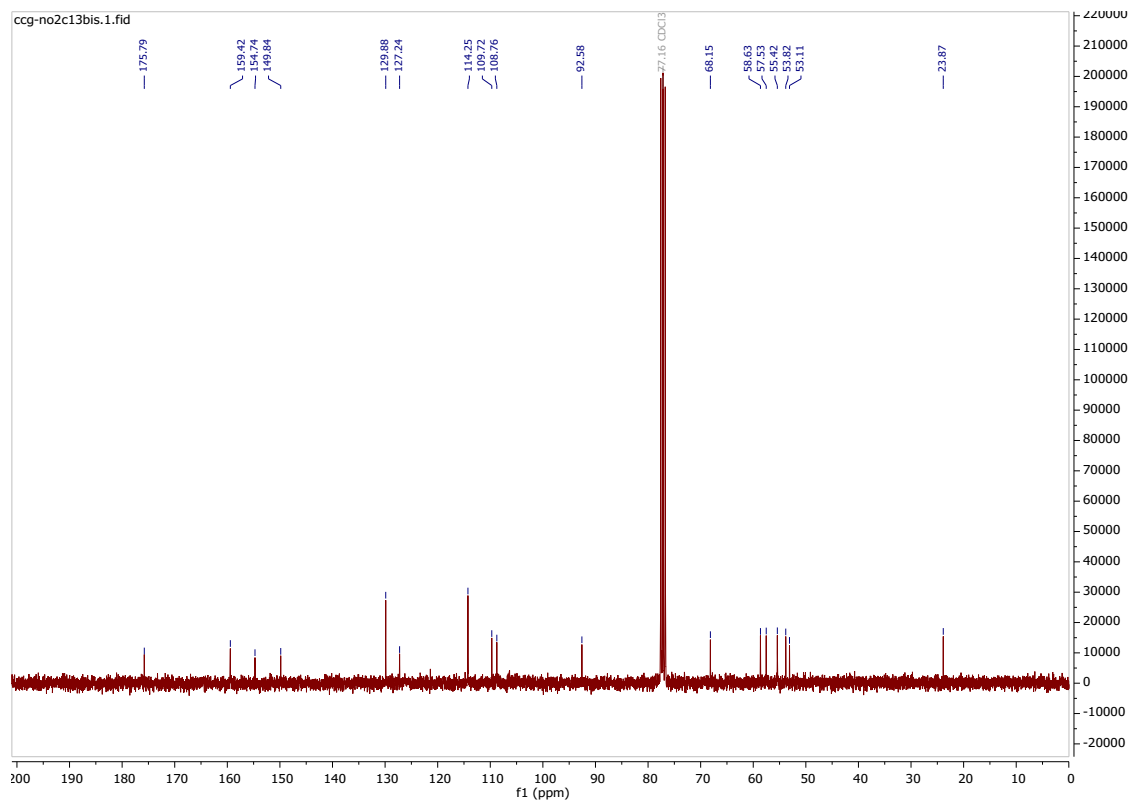

# Methyl 5-(5-(hydroxymethyl)furan-2-yl)-1H-pyrrole-2-carboxylate (17)

CCGPPIRROLBIS.1.fid

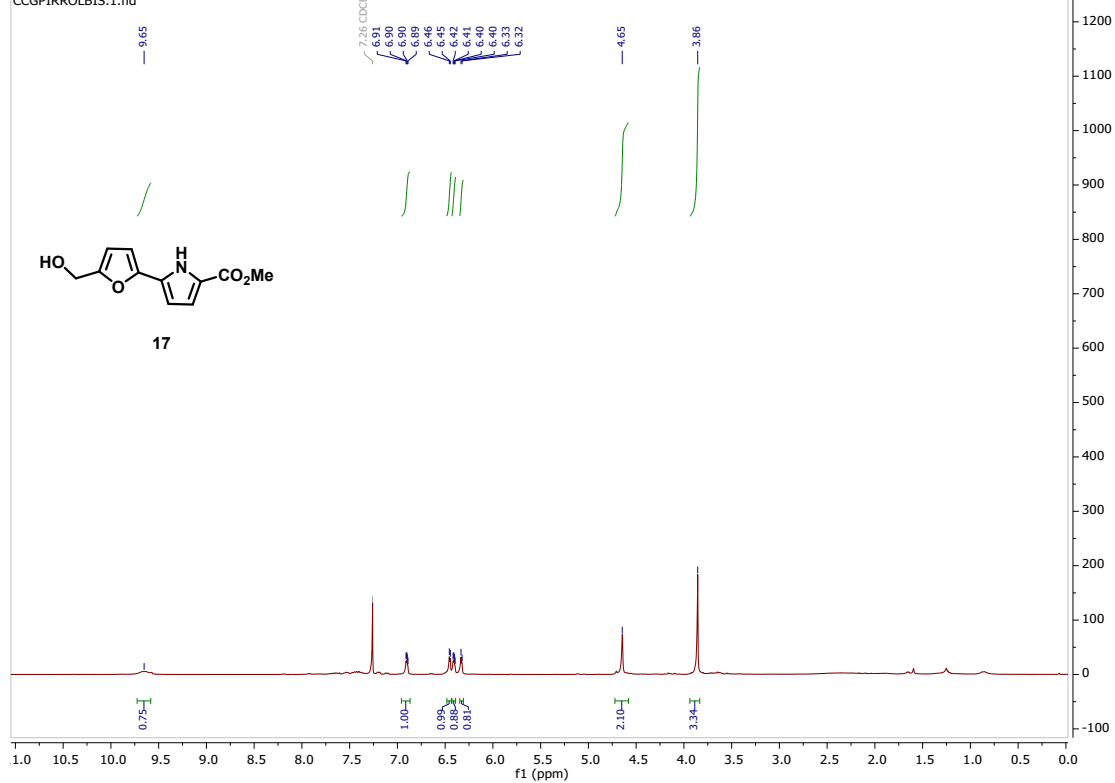

ccgprrrolc13.1.fid

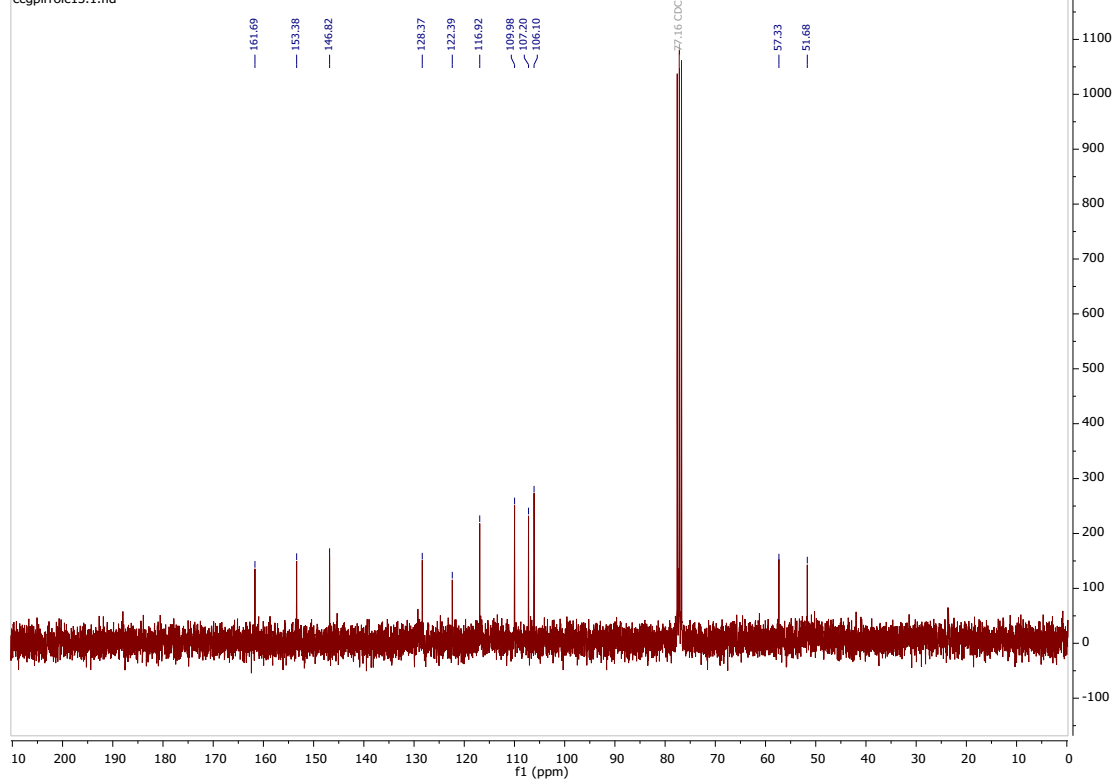

**(±)-Methyl 1-methyl-4,6-dioxo-5-phenyl-3-(5-(2,4,6-trimethylbenzyl)furan-2-yl)octahydropyrrolo[3,4-c]pyrrole-1-carboxylate (18)**

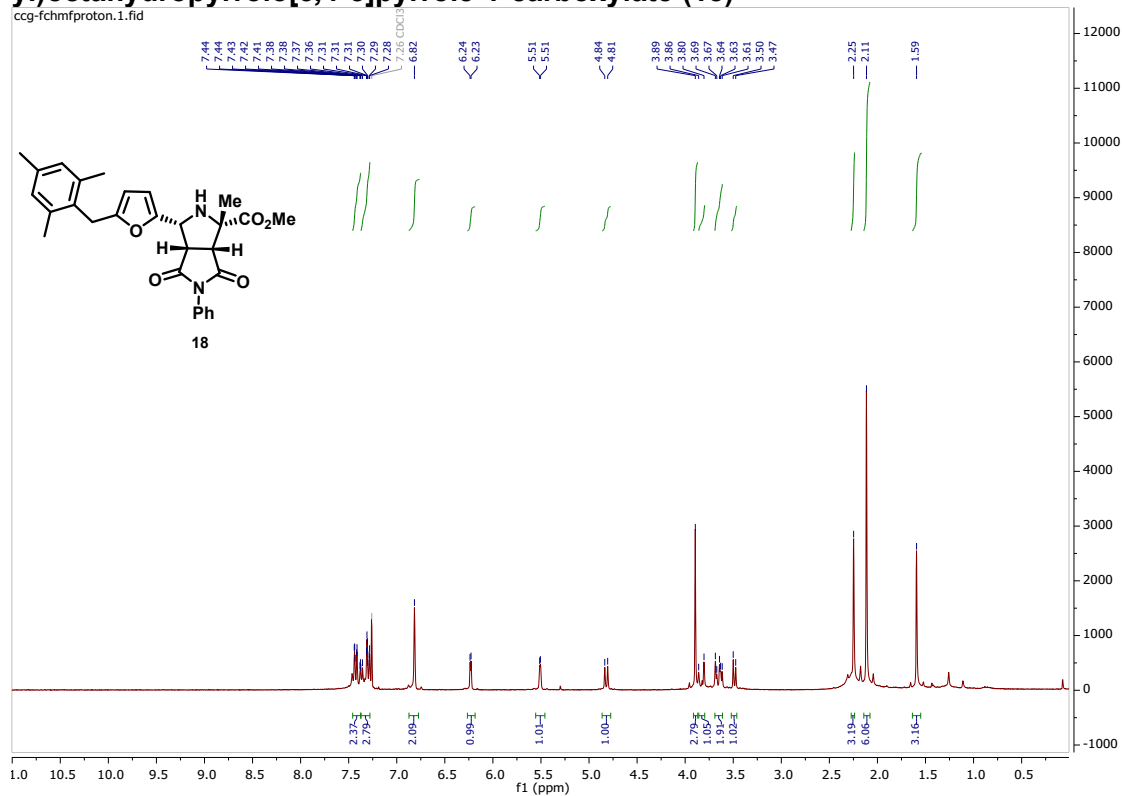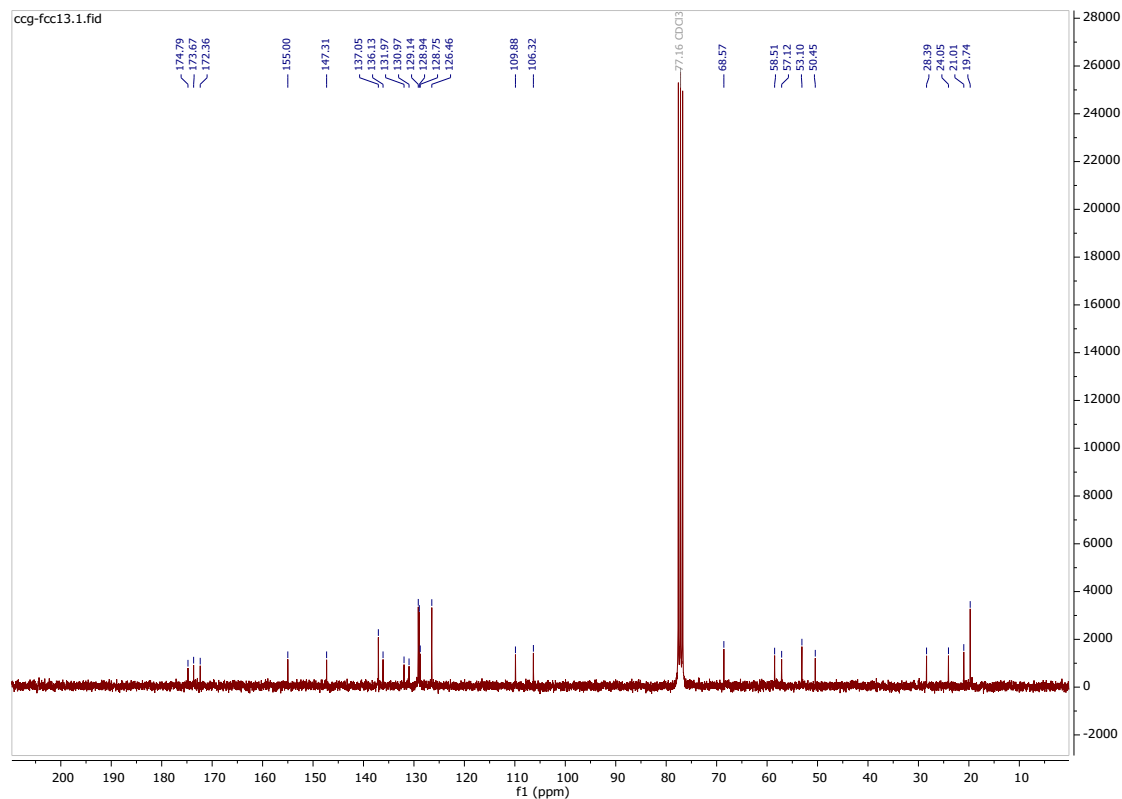

(±)-Methyl 3-(5-(4-methoxybenzyl)furan-2-yl)-1-methyl-4,6-dioxo-5-phenyloctahydropyrrolo[3,4-c]pyrrole-1-carboxylate (19)

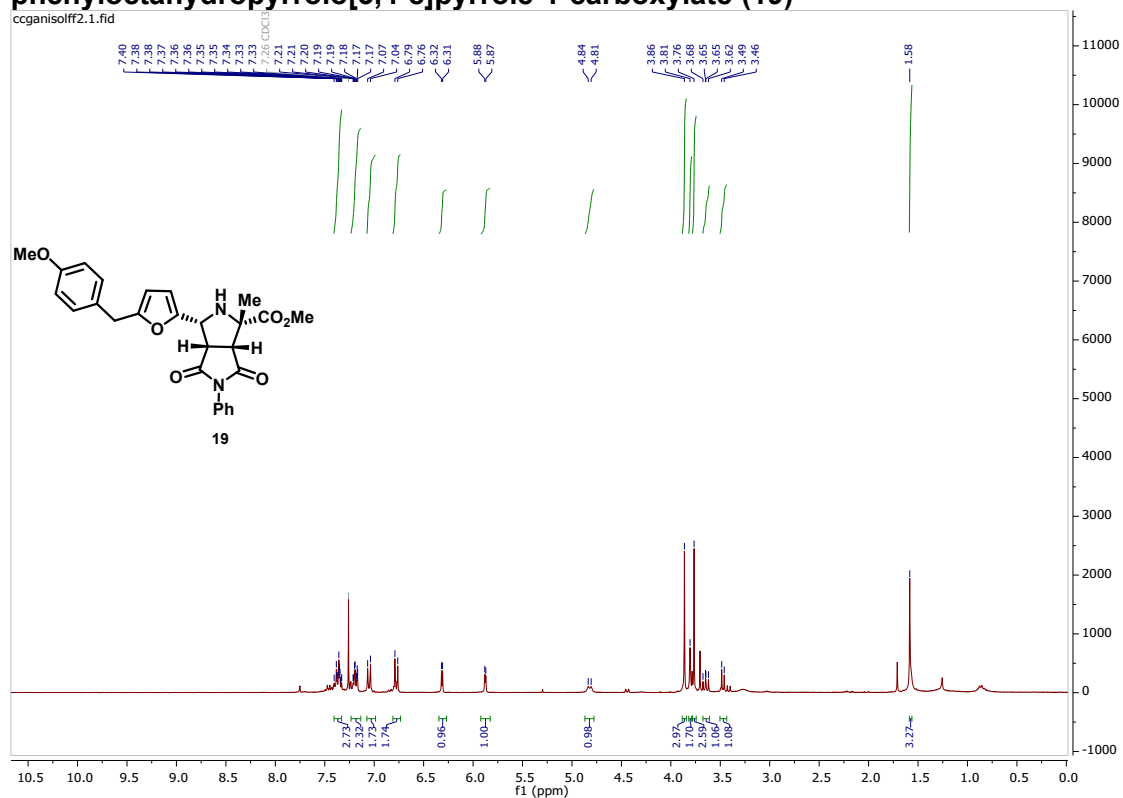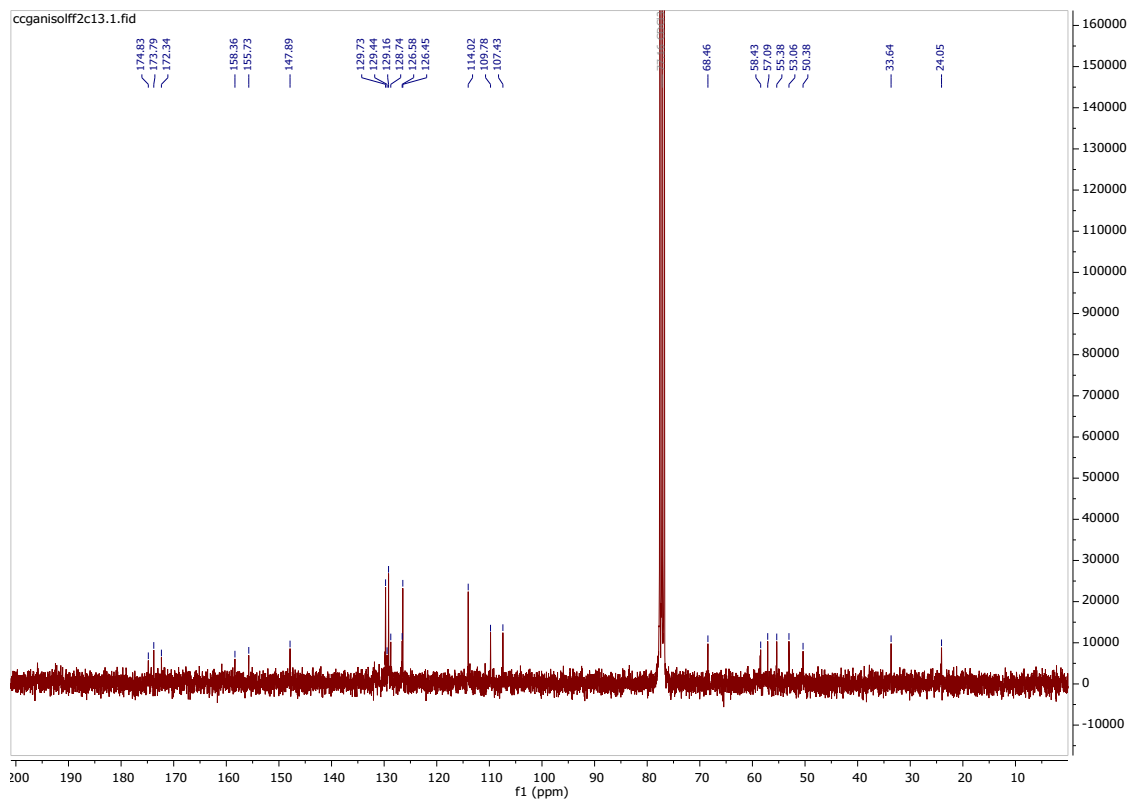

**(±)-Methyl 1-methyl-4,6-dioxo-3-(5-(phenethoxymethyl)furan-2-yl)-5-phenyloctahydropyrrolo[3,4-c]pyrrole-1-carboxylate (20)**

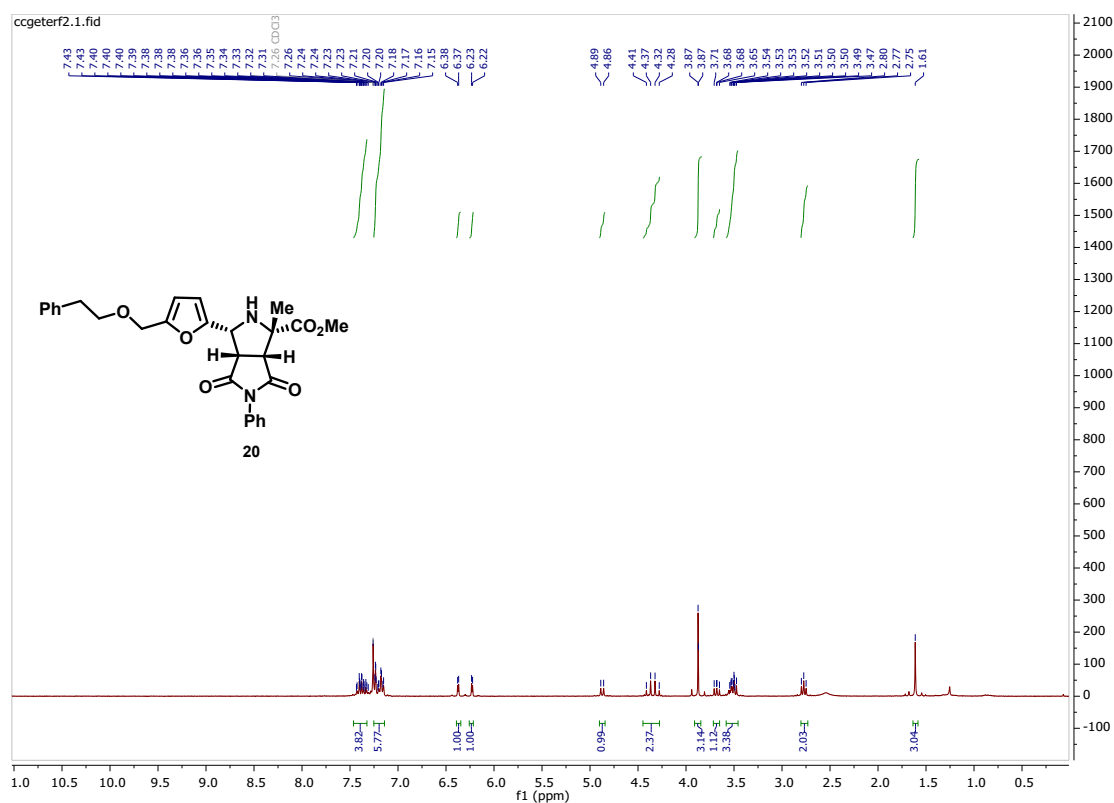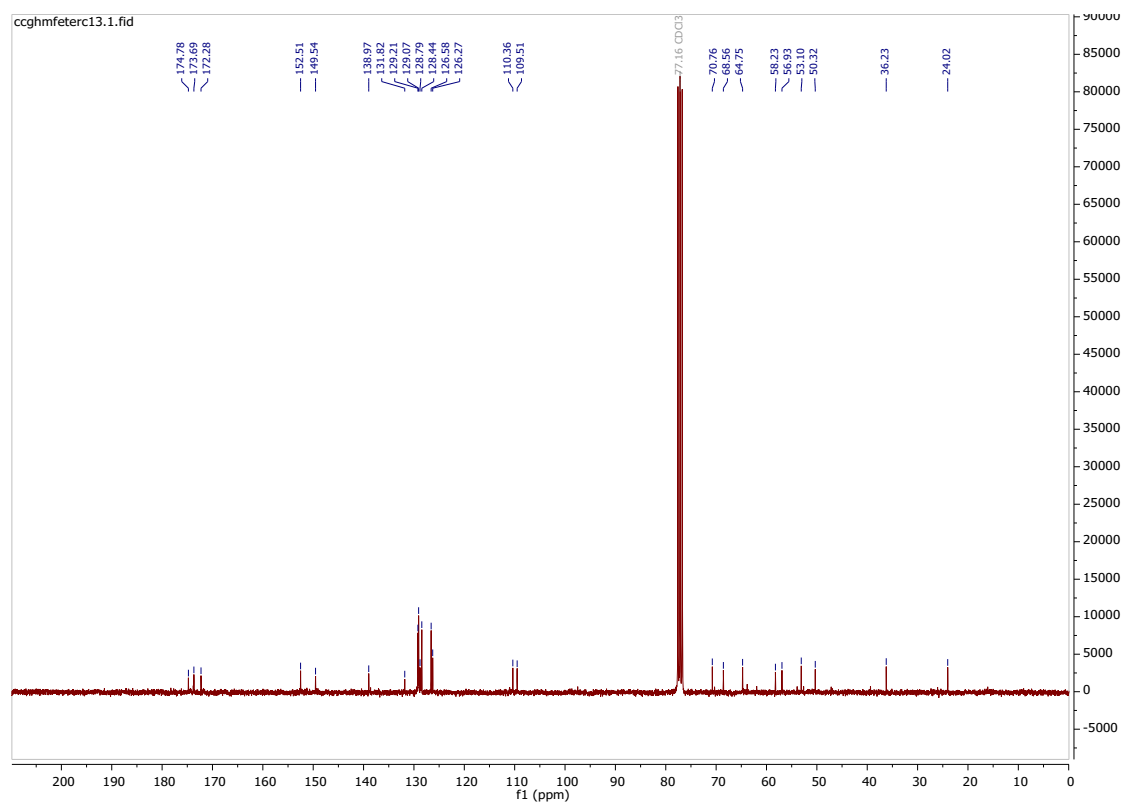

**(±)-Methyl 3-(5-(*E*)-3-(4-methoxyphenyl)acryloyloxymethylfuran-2-yl)-1-methyl-4,6-dioxo-5-phenyloctahydropyrrolo[3,4-*c*]pyrrole-1-carboxylate (21)**

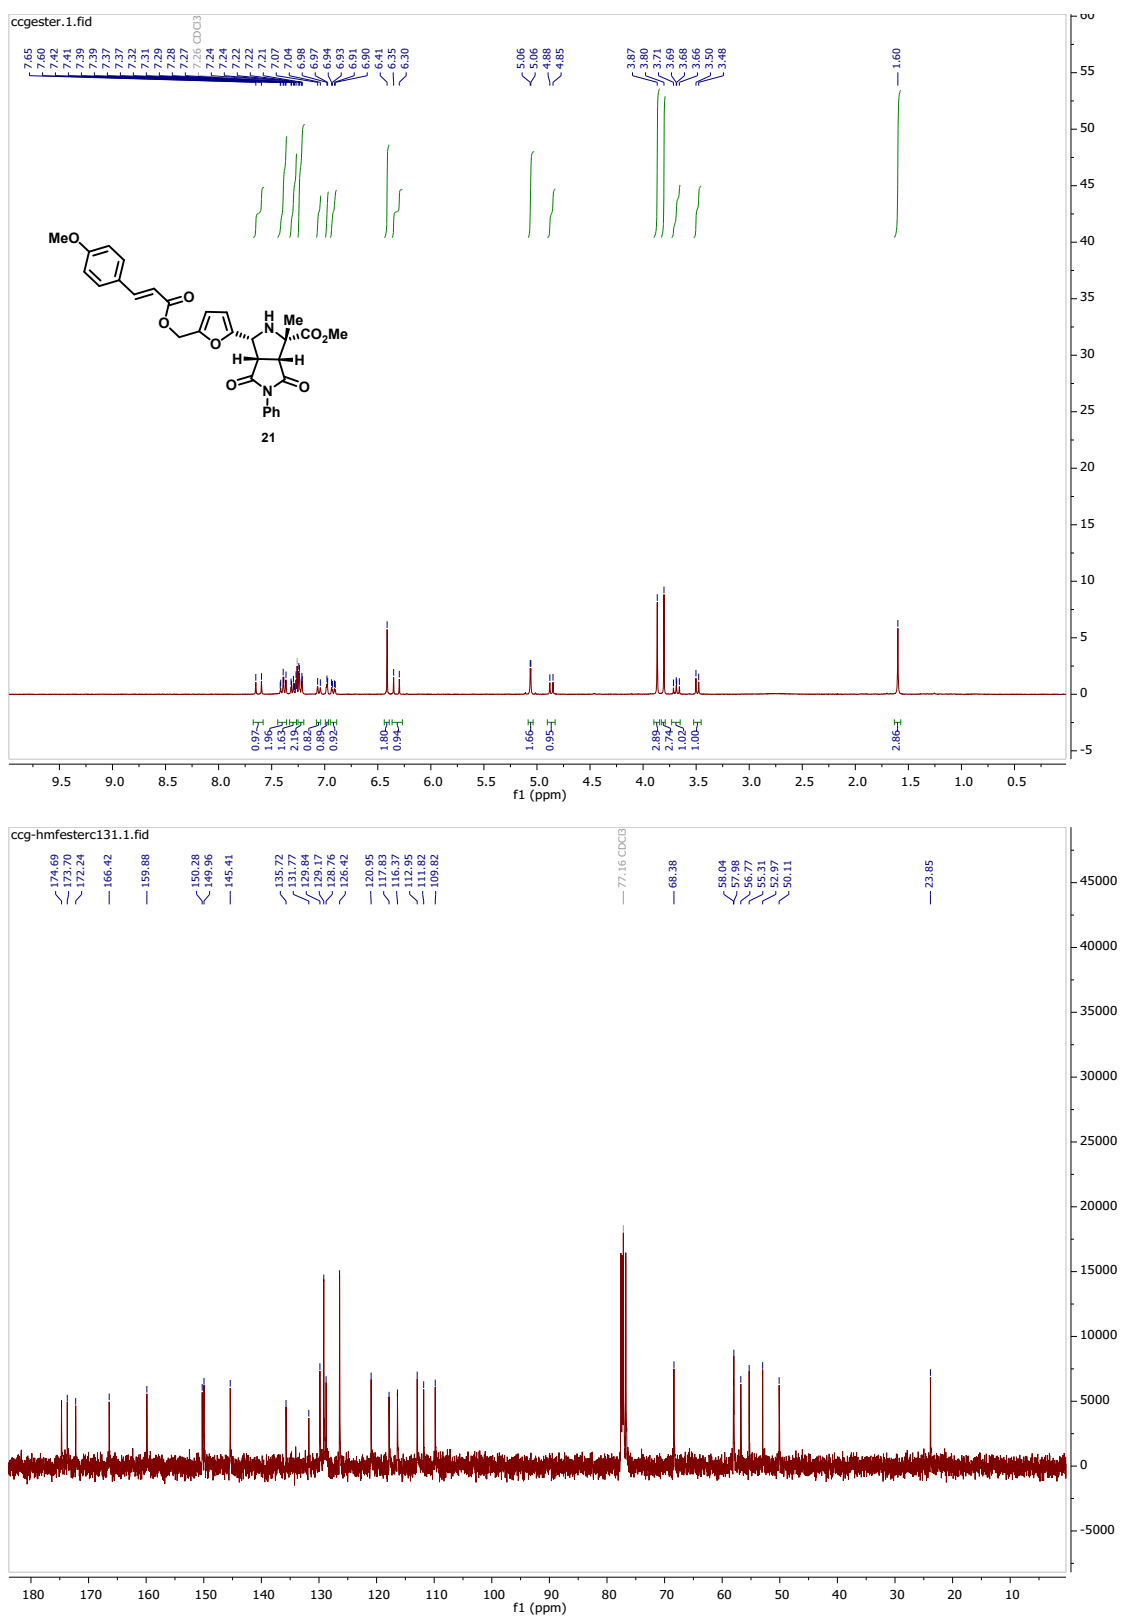

## 9. Bibliography

1. Cabrera, S.; Gómez Arrayás, R.; Carretero, J. C. *J. Am. Chem. Soc.* **2005**, *127*, 16394.
2. Bering, L., Jeyakumar, K., Antonchick, A. *Org. Lett.* **2018**, *20*, 3911–3914.
